# Gene Expression Profiles in Paired Gingival Biopsies from Periodontitis-Affected and Healthy Tissues Revealed by Massively Parallel Sequencing

Haleh Davanian<sup>1\*</sup>, Henrik Stranneheim<sup>2,3</sup>, Tove Båge<sup>1</sup>, Maria Lagervall<sup>3</sup>, Leif Jansson<sup>3</sup>, Joakim Lundeberg<sup>2</sup>, Tülay Yucel-Lindberg<sup>1</sup>

**1** Division of Periodontology, Department of Dental Medicine, Karolinska Institutet, Huddinge, Sweden, **2** Science for Life Laboratory, Division of Gene Technology, School of Biotechnology, Royal Institute of Technology (KTH), Solna, Sweden, **3** Department of Periodontology at Skanstull, Stockholm County Council Sweden, Stockholm, Sweden

## Abstract

Periodontitis is a chronic inflammatory disease affecting the soft tissue and bone that surrounds the teeth. Despite extensive research, distinctive genes responsible for the disease have not been identified. The objective of this study was to elucidate transcriptome changes in periodontitis, by investigating gene expression profiles in gingival tissue obtained from periodontitis-affected and healthy gingiva from the same patient, using RNA-sequencing. Gingival biopsies were obtained from a disease-affected and a healthy site from each of 10 individuals diagnosed with periodontitis. Enrichment analysis performed among uniquely expressed genes for the periodontitis-affected and healthy tissues revealed several regulated pathways indicative of inflammation for the periodontitis-affected condition. Hierarchical clustering of the sequenced biopsies demonstrated clustering according to the degree of inflammation, as observed histologically in the biopsies, rather than clustering at the individual level. Among the top 50 upregulated genes in periodontitis-affected tissues, we investigated two genes which have not previously been demonstrated to be involved in periodontitis. These included interferon regulatory factor 4 and chemokine (C-C motif) ligand 18, which were also expressed at the protein level in gingival biopsies from patients with periodontitis. In conclusion, this study provides a first step towards a quantitative comprehensive insight into the transcriptome changes in periodontitis. We demonstrate for the first time site-specific local variation in gene expression profiles of periodontitis-affected and healthy tissues obtained from patients with periodontitis, using RNA-seq. Further, we have identified novel genes expressed in periodontitis tissues, which may constitute potential therapeutic targets for future treatment strategies of periodontitis.

**Citation:** Davanian H, Stranneheim H, Båge T, Lagervall M, Jansson L, et al. (2012) Gene Expression Profiles in Paired Gingival Biopsies from Periodontitis-Affected and Healthy Tissues Revealed by Massively Parallel Sequencing. PLoS ONE 7(9): e46440. doi:10.1371/journal.pone.0046440

**Editor:** Michael Glogauer, University of Toronto, Canada

**Received:** June 14, 2012; **Accepted:** August 30, 2012; **Published:** September 28, 2012

**Copyright:** © 2012 Davanian et al. This is an open-access article distributed under the terms of the Creative Commons Attribution License, which permits unrestricted use, distribution, and reproduction in any medium, provided the original author and source are credited.

**Funding:** This study was supported by funds from the Swedish National Graduate School in Odontological Science, Swedish Research Council, project number 73XD-15005, the Swedish Patent Revenue Fund, Stockholm County Council and Karolinska Institutet. The funders had no role in study design, data collection and analysis, decision to publish, or preparation of the manuscript.

**Competing Interests:** The authors have declared that no competing interests exist.

\* E-mail: haleh.davianian@ki.se

These authors contributed equally to this work.

## Introduction

Periodontitis is a chronic inflammatory disease characterized by the destruction of periodontal tissue. This common disease, primarily initiated by periodontal pathogens, is an outcome of a complex interaction between periodontal microorganisms and the host inflammatory response [1]. The host response involves proinflammatory cytokines, chemokines, prostaglandins, Toll-like receptors and proteolytic enzymes, which have all been demonstrated to play an important role in the pathogenesis of periodontitis [2,3].

Studies have been performed combining *in vivo* and *in vitro* approaches to identify genes responsible for periodontitis. To date, there are a few published microarray studies investigating the gene expression profile in periodontitis. One microarray study reported no significant differences in gene expression at different pathological sites in patients with chronic and aggressive periodontitis [4], whereas Kim et al. [5] and Demmer et al. [6] showed a number of

genes that were upregulated in periodontitis compared to healthy controls. In addition, Beikler et al. [7] demonstrated that in periodontitis sites, the expression of immune and inflammatory genes was down-regulated following non-surgical therapy. With regard to *in vitro* studies, gene expression profiling has been performed on gingival fibroblasts from inflamed and healthy gingival tissues, for a limited number of inflammatory markers, such as interleukin (IL)-1, IL-6, IL-8, tumor necrosis factor- $\alpha$  (TNF- $\alpha$ ) and CD14 [8]. Furthermore, microarray analysis has also been performed on periodontal ligament cells and gingival keratinocytes [9,10]. With regard to disease susceptibility at a genomic level, one genome-wide association study (GWAS) has been conducted in patients with aggressive periodontitis showing an association between aggressive periodontitis and intronic single nucleotide polymorphism rs1537415, which is located in the glycosyltransferase gene GLT6D1 [11].

Despite research investigating periodontitis gene expression profiles through microarray analysis, specific genes responsible for the disease have not yet been found. However, the recent development of massively parallel sequencing has provided a more comprehensive and accurate tool for gene expression analysis through sequenced based assays of transcriptomes, RNA-Sequencing (RNA-Seq). This method enables analysis of the complexity of whole eukaryotic transcriptomes [12] and studies comparing RNA-Seq and microarrays have shown that RNA-Seq has less bias, a greater dynamic range, a lower frequency of false positive signals and higher reproducibility [13,14]. The aim of the present study was to investigate the general pattern of the gene expression profile in periodontitis using RNA-Seq. We also aimed to investigate the local variation in gene expression at site level, comparing periodontitis-affected and healthy gingival tissues obtained from the same patient.

## Materials and Methods

### Ethics Statement

The study was performed in accordance with the Declaration of Helsinki and the current legislation in Sweden and after approval from the Karolinska Institutet Ethical Research Board. The Regional Ethics Board in Stockholm approved the collection of the biopsies and informed consent was obtained from all patients.

### Collection of gingival tissue samples

A total of 10 nonsmoking individuals (20 biopsies), were included in the study. Four patients in the study group had other types of diseases: patient 2 was undergoing investigations for the disease sarcoidosis, patient 3 had diabetes type-2, patient 7 had a history of osteoarthritis and patient 10 was diagnosed with asthma. All participants were examined for periodontal disease and those with a tooth site demonstrating a probing depth  $\geq 6$  mm, clinical attachment level  $\geq 5$  mm and bleeding on probing were included in the periodontitis-affected group, according to the clinical parameters previously used as indicators of periodontitis [15,16,17]. During flap surgery, two adjacent gingival biopsies with identical clinical status and of about the same size were also obtained from a clinically healthy gingival pocket. Clinically healthy pockets were defined as sites with no gingival/periodontal inflammation, no bleeding on probing, a probing depth  $\leq 3.5$  mm and a clinical attachment level  $\leq 3.5$  mm. One of the biopsies from each site was stored in RNA Later (Applied Biosystems, USA) overnight at 4°C and thereafter stored at -80°C for subsequent RNA isolation. The second biopsy from each site was used for histological and immunohistochemical analysis.

### Hematoxylin-Eosin staining

Deparaffinized serial sections of gingival tissues were formalin fixed (4% neutral buffered formalin) and paraffin embedded. For assessment of orientation of the epithelium and connective tissue as well as the degree of inflammation, deparaffinized serial sections (4  $\mu$ m) were prepared and sections of each biopsy were stained with Hematoxylin-Eosin (H&E). The degree of inflammatory cell infiltration was evaluated by three blinded observers, using a relative scale from 0 to 3, and statistical differences between periodontitis-affected and healthy sites were tested using the Wilcoxon signed-rank test.

**Table 1. Patient characteristics and periodontal status.**

| Patient | Patient characteristics |     |                    | Periodontitis-affected sites          |                                        |                    | Healthy sites                          |                                        |  |
|---------|-------------------------|-----|--------------------|---------------------------------------|----------------------------------------|--------------------|----------------------------------------|----------------------------------------|--|
|         | Gender                  | Age | Probing depth (mm) | InflammationH&E (0-3) <sup>a, c</sup> | Inflammation CD3 (0-3) <sup>b, d</sup> | Probing depth (mm) | Inflammation H&E (0-3) <sup>a, c</sup> | Inflammation CD3 (0-3) <sup>b, d</sup> |  |
| 1       | M                       | 52  | 7                  | 3                                     | 2                                      | 3                  | 2                                      | 0                                      |  |
| 2       | M                       | 45  | 8                  | 1                                     | 1                                      | 3                  | 1                                      | 1                                      |  |
| 3       | M                       | 52  | 7                  | 3                                     | 3                                      | 3                  | 1                                      | 1                                      |  |
| 4       | F                       | 47  | 7                  | 3                                     | 3                                      | 3                  | 1                                      | 2                                      |  |
| 5       | F                       | 37  | 7                  | 2                                     | 2                                      | 3                  | 1                                      | 1                                      |  |
| 6       | M                       | 59  | 7                  | 2                                     | 3                                      | 3                  | 2                                      | 1                                      |  |
| 7       | F                       | 66  | 7                  | 2                                     | -                                      | 3                  | 0                                      | -                                      |  |
| 8       | M                       | 48  | 6                  | 2                                     | 2                                      | 3                  | 0                                      | 0                                      |  |
| 9       | M                       | 42  | 8                  | 3                                     | 1                                      | 2                  | 1                                      | 1                                      |  |
| 10      | F                       | 54  | 6                  | 2                                     | 1                                      | 3                  | 1                                      | 1                                      |  |

<sup>a</sup>0 = no evidence of inflammatory infiltration, 1 = slight inflammatory infiltration, 2 = moderate inflammatory infiltration and 3 = severe inflammatory infiltration.

<sup>b</sup>0 = no CD3 positive cells, 1 = low amount of CD3 positive cells, 2 = moderate amount of CD3 positive cells, 3 = high amount of CD3 positive cells and - = not enough material to perform staining.

<sup>c</sup>Significant difference between periodontitis-affected and healthy sites ( $p < 0.01$ ).

<sup>d</sup>Significant difference between periodontitis-affected and healthy sites ( $p < 0.05$ ).

doi:10.1371/journal.pone.0046440.t001

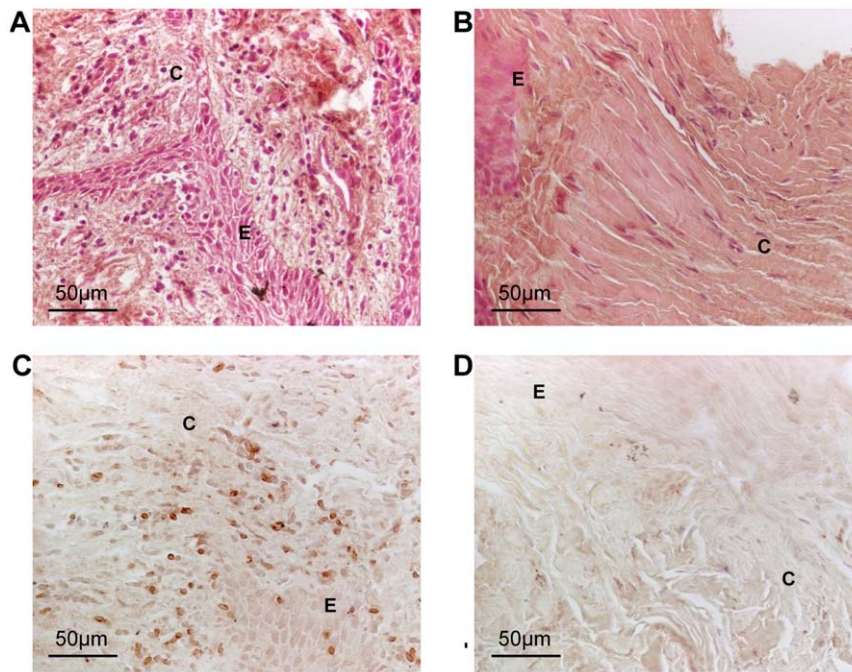

**Figure 1. H&E and CD3-stained paraffin-embedded gingival biopsies obtained from one representative patient with periodontitis.** A. H&E staining of inflammatory cells in periodontitis-affected sections. B. H&E staining of inflammatory cells in healthy gingival sections. C. Staining of the T-cell marker CD3 in periodontitis-affected sections. D. Staining of the T-cell marker CD3 in healthy sections. E, epithelium, C, connective tissue. doi:10.1371/journal.pone.0046440.g001

### Immunohistochemical stainings in gingival tissue

For staining of the T cell marker CD3, interferon regulatory factor 4 (IRF4) and chemokine (C-C motif) ligand 18 (CCL18), gingival tissues were rinsed in phosphate buffered saline (PBS) with 0.1% Saponin (PBS-Saponin buffer) for 10 min. After an antigen retrieval procedure, 10 mM Tris, 1 mM EDTA (pH 9.0) for CD3 and 0.01 M Citrate acid (pH 6.0) for IRF4 and CCL18, sections were blocked in 1% H<sub>2</sub>O<sub>2</sub> in PBS-Saponin for 60 min at room temperature (RT) for CD3 and for 45 min at RT for IRF4 and CCL18. Subsequently, tissues were rinsed in PBS-Saponin for 10 min and further treated with 3% bovine serum albumin (BSA) diluted in PBS-Saponin for 30 min at RT. The expression of CD3, IRF4 and CCL18 was investigated using CD3 polyclonal rabbit antibody (1 µg/ml, PBS-Saponin) from Dako Sweden AB (Stockholm, Sweden), IRF4 polyclonal rabbit antibody (0.5 µg/ml, PBS-Saponin) from Atlas antibodies (Stockholm, Sweden) and CCL18 polyclonal rabbit anti-human antibody (0.5 µg/ml, PBS-Saponin) from Sigma-Aldrich (St. Louis, MO, USA). Normal rabbit IgG from R&D systems (MN, USA) was used as negative control. After incubation with primary antibody, sections were blocked with 1% normal goat serum in PBS for 15 min. Afterwards, sections were incubated with a biotinylated secondary antibody provided in the Vectastain ABC-Elite Complex Kit (Vector labs, Burlingame, CA, USA) followed by application of the Elite ABC solution for 40 min at RT in the dark. Thereafter, sections were washed with PBS and the peroxidase activity was visualized with 0.3% (v/v) in DAB buffer containing 0.1% (v/v) H<sub>2</sub>O<sub>2</sub>. Finally, the slides were washed with distilled water, dehydrated through an ethanol series (70%, 95%, 99.9%) into xylene, mounted, and photographed using a light microscope. For CD3 stainings, the amount of positive cells was evaluated by three blinded observers, using a relative scale from 0 to 3, and statistical differences between periodontitis-affected and healthy biopsies were tested using the Wilcoxon signed-rank test.

### RNA extraction

RNA was extracted from gingival biopsies using steel-bead matrix tubes and a tabletop Fast-Prep homogenizer by two sequential centrifugations for 20 s at speed 6.5 (Qbiogene, Irvine, CA, USA). The RNA was purified on RNeasy Spin Columns (Qiagen, Valencia, CA, USA), treated with DNase H to ensure degradation of DNA, and thereafter eluted in RNase-free water. The average RNA yield was 15.6 µg. RNA quality was assessed using the RNA 6000 NanoLabChip Kit of the Bioanalyzer system from Agilent Technologies (Santa Clara, CA, USA).

### Transcriptome sample preparation for sequencing

A total amount of 2–3 µg per sample was used as input material for the RNA sample preparations. All samples had RIN values above 8. The samples were bar-coded and prepared according to the protocol (Cat# RS-930-1001) from the manufacturer (Illumina, San Diego, CA, USA), as previously described by Stranneheim et al. [18]. All sample preparation reagents were taken from the Illumina mRNA Sample Preparation Kit or ordered from vendors specified in the mRNA sample preparation protocol, except for automation specific reagents: carboxylic acid beads used for precipitation; the ethanol and tetraethylene glycol (EtOH/TEG) and the Polyethylene Glycol and sodium chloride (PEG/NaCl) precipitation buffers.

### Clustering and sequencing

The clustering of the bar-coded samples was performed on a cBot Cluster Generation System using an Illumina HiSeq Single Read Cluster Generation Kit according to the manufacturer's instructions. The library preparations were sequenced on an Illumina HiSeq 2000 as single-reads to 100 bp. Two sequencing runs were performed according to the manufacturer's instructions where two and three lanes were used in the first sequencing and

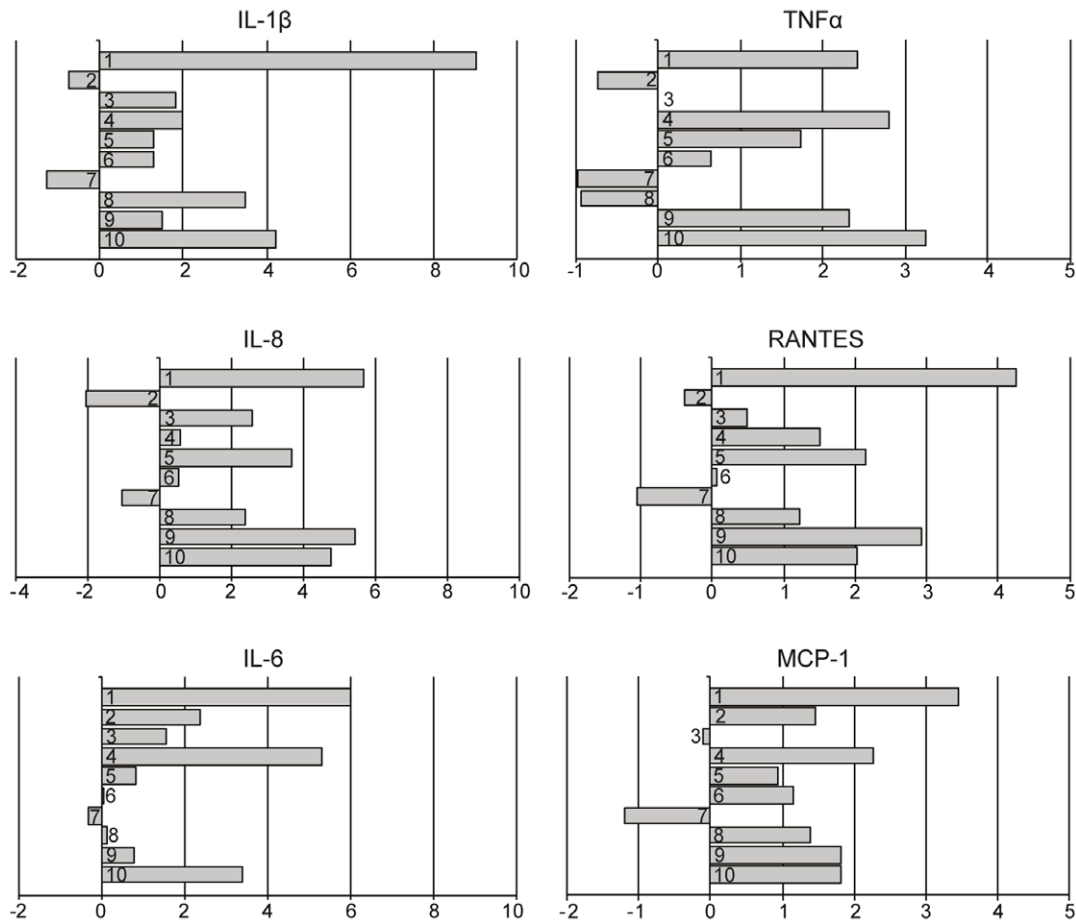

**Figure 2. Expression of the inflammatory mediators in periodontitis-affected and healthy tissues obtained by RNA-seq.** The bars show the expression ( $\log_2$  fold change) pattern based on RNA-Seq reads of IL-1 $\beta$ , IL-6, IL-8, TNF $\alpha$ , RANTES and MCP-1. doi:10.1371/journal.pone.0046440.g002

second sequencing run, respectively (Table S1). The runs generated a total of 402 million reads with an average of 15 million reads per sample that passed the Illumina Chastity filter; these reads were included in the study.

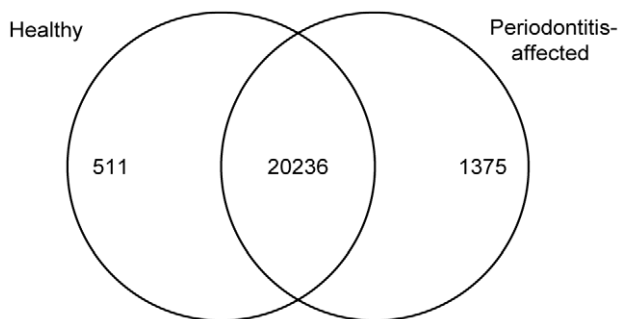

**Figure 3. Venn diagram of mRNA transcripts.** Venn diagram showing genes that were uniquely expressed in periodontitis-affected (1375) and healthy (511) gingival tissues. The intersection of the two circles refers to transcripts, which are expressed in both periodontitis-affected and healthy gingival tissues (20 236). doi:10.1371/journal.pone.0046440.g003

### Sequence analysis

All sequences were aligned to the human genome reference hg19 with TopHat [19,20] version 1.1.4 and Samtools [21] version 0.1.18 using TopHat standard parameters except for parameters `-solexa1.3-quals -p 8 -GTF Homo_sapiens.GRCh37.59.gtf`. Annotations from Ensembl and RefSeq, downloaded from University of California, Santa Cruz (UCSC) Genome Browser, were used to assign features to genomic positions. Sequences aligned to the human genome were assigned to features and counted using HTSeq version 0.4.6 with parameters `-m intersection-strict -s no -t exon`. The R/Bioconductor package DESeq [22] was used to call differential gene expression on read counts generated by HTSeq and to perform hierarchical clustering of samples. All biological replicates for healthy and periodontitis-affected had  $R^2$  (Spearman) correlation of gene expression (read counts) above 0.92.

### Functional analyses of gene lists using WebGestalt

Analyses of gene categories and pathways was performed using the WEB-based Gene Set Analysis Toolkit v2 (WebGestalt) [23] with parameters: Id Type: Ensembl\_gene\_stable\_id, Ref Set: Entrez Gene, Significance Level:  $p < 0.05$ , Statistics Test: Hypergeometric, MTC: BH, Minimum: 2. KEGG analysis was used for pathway enrichment analysis and the Gene ontology (GO)

**Table 2.** Enriched regulated (KEGG) biological pathways among unique genes in periodontitis-affected tissues.

| Pathway                                                | Total genes in pathway | Unique genes in pathway <sup>a</sup> | Adj <i>p</i> value <sup>b</sup> |
|--------------------------------------------------------|------------------------|--------------------------------------|---------------------------------|
| Neuroactive ligand-receptor interaction                | 256                    | 19                                   | 8.18e-10                        |
| Cytokine-cytokine receptor interaction                 | 267                    | 18                                   | 6.75e-09                        |
| Chemokine signaling pathway                            | 190                    | 10                                   | 0.0004                          |
| Intestinal immune network for IgA production           | 50                     | 5                                    | 0.0014                          |
| Alanine, aspartate and glutamate metabolism            | 31                     | 5                                    | 0.0022                          |
| Tyrosine metabolism                                    | 46                     | 4                                    | 0.0103                          |
| Calcium signaling pathway                              | 178                    | 7                                    | 0.0160                          |
| Hedgehog signaling pathway                             | 56                     | 4                                    | 0.0161                          |
| Systemic lupus erythematosus                           | 140                    | 6                                    | 0.0168                          |
| Glycine, serine and threonine metabolism               | 31                     | 3                                    | 0.0196                          |
| Jak-STAT signaling pathway                             | 155                    | 6                                    | 0.0229                          |
| Vascular smooth muscle contraction                     | 115                    | 5                                    | 0.0271                          |
| Arrhythmogenic right ventricular cardiomyopathy (ARVC) | 76                     | 4                                    | 0.0293                          |

<sup>a</sup>Lists of uniquely expressed genes within the enriched pathways can be found in Table S1.

<sup>b</sup>adj *p* value indicates the significance of the enrichment, (adj *p*<0.05).

doi:10.1371/journal.pone.0046440.t002

category Biological process was used for the functional annotation analysis.

## Results

### Patients and gingival tissues

A total of 10 patients, six males and four females, with a mean age of  $50 \pm 8$ , were included in the study. For each patient, a total of four gingival biopsies of about the same size were obtained from periodontitis-affected and healthy gingiva, with two biopsies from each site. Bleeding status, probing depth and degree of inflammation in the gingival tissues for each of the two gingival sites was recorded (Table 1). To assess the degree of gingival inflammation in the periodontitis-affected and healthy tissues, histological and immunohistochemistry staining was performed using H&E and anti-CD3 (Fig. 1). Scoring of the degree of inflammatory cell infiltration, assessed by H&E staining, and the amount of CD3 positive cells showed significantly higher inflammation in tissue from periodontitis-affected sites ( $p < 0.01$  for H&E and  $p < 0.05$  for CD3; Table 1).

### RNA-Sequencing

We sequenced cDNA from 10 periodontitis-affected and 10 healthy gingival tissues, with an average of 15 million reads of 100 bp in length per sample. A pairwise approach, where each periodontitis-affected biopsy had a healthy counterpart from the same individual, was used to eliminate the background noise of individual-specific gene transcription, enabling acquisition of more relevant data from the cohort. Aligning the sequence reads against the human genome yielded a median of 68% of uniquely aligned reads across all samples. The expression pattern, based on RNA-Seq reads, of well-known inflammatory mediators IL-1 $\beta$ , IL-6, IL-8, TNF $\alpha$ , Regulated upon Activation, Normal T-cell Expressed, and Secreted (RANTES) and Monocyte Chemoattractant Protein-1 (MCP-1) were analyzed in all the tissue samples. The expression ( $\log_2$  fold change) of these mediators was shown to be higher in the majority of the periodontitis-affected gingival tissue compared to healthy gingival tissue from the same patient (Fig. 2).

**Table 3.** Enriched regulated (KEGG) biological pathways among unique genes in healthy tissues.

| Pathway                                 | Total genes in pathway | Unique genes in pathway <sup>a</sup> | Adj <i>p</i> value <sup>b</sup> |
|-----------------------------------------|------------------------|--------------------------------------|---------------------------------|
| Neuroactive ligand-receptor interaction | 256                    | 11                                   | 8.18e-10                        |
| Glycolysis/Gluconeogenesis              | 62                     | 3                                    | 6.75e-09                        |
| Calcium signaling pathway               | 178                    | 4                                    | 0.0004                          |
| Gap junction                            | 90                     | 3                                    | 0.0014                          |
| Pyruvate metabolism                     | 40                     | 2                                    | 0.0022                          |
| Tryptophan metabolism                   | 40                     | 2                                    | 0.0103                          |

<sup>a</sup>Lists of uniquely expressed genes within the enriched pathways can be found in Table S1.

<sup>b</sup>adj *p* value indicates the significance of the enrichment, (adj *p*<0.05).

doi:10.1371/journal.pone.0046440.t003

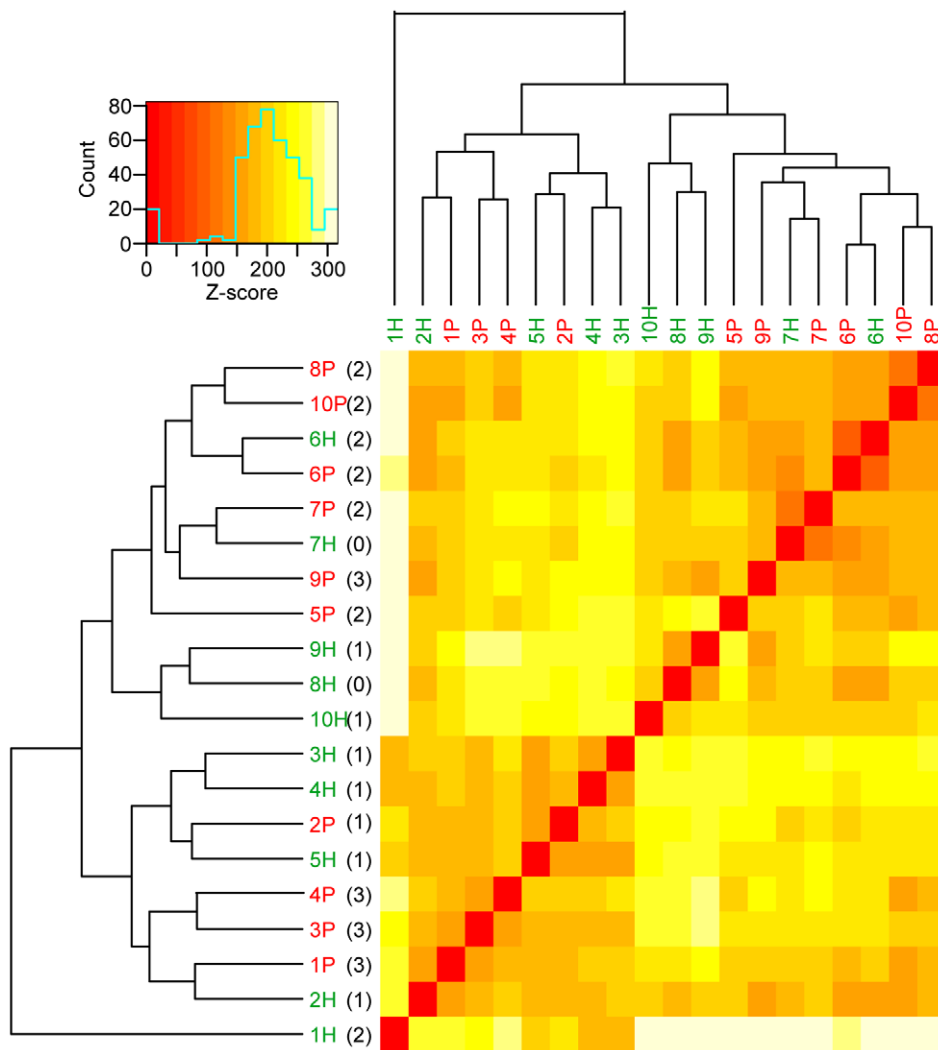

**Figure 4. Clustering dendrogram and heatmap of periodontitis-affected and healthy biopsies.** Clustering of all samples was based on gene transcripts with a median read above three times the background noise. The length of the branch between two biopsies and the colors of the heatmap correspond to degree of similarity between the gene expression profiles. Colors can be interpreted using the scale bar. Numbers in parentheses denote the inflammation scores of the biopsies after H&E histological evaluation.  
doi:10.1371/journal.pone.0046440.g004

#### Distribution of gene transcripts between periodontitis-affected and healthy gingival tissues

A total of 22 122 different mRNA transcripts were expressed in the periodontitis-affected and healthy gingival tissue samples. Among these transcripts, 1375 were unique to the periodontitis-affected tissue samples whereas 511 genes were uniquely transcribed in healthy gingival tissues (Fig. 3). KEGG enrichment analysis using WebGestalt [24] was performed among the unique genes for the periodontitis-affected and healthy tissues which revealed several regulated pathways indicative of inflammation for the periodontitis-affected condition (Table 2 and Table S1). In contrast, in the healthy gingival tissues, regulated pathways indicated a non-inflammatory profile among the unique genes, as demonstrated in Table 3 and Table S1.

#### Clustering of biopsies

Unsupervised hierarchical clustering was performed on all gene transcripts having a median read count above a cutoff level set to 0.3 read counts per feature, to exclude expression due to spurious transcription (Fig. 4). The gingival tissues from periodontitis-

affected sites from different patients showed a more similar gene expression pattern than healthy gingival tissues from the same patient. Clustering according to individual, where the paired healthy and periodontitis-affected biopsies cluster together, was only observed for patient 6 and 7. However, the biopsies showed a general trend of clustering according to the degree of inflammation as assessed by H&E staining (Table 1), except for sample 7H, sample 2H and an outlier sample 1H, which clustered separately. There was also a trend of forming larger clusters depending on sequence run, but paired biopsies (periodontitis-affected and healthy) from each patient were always analyzed in the same sequence run.

#### Differential gene expression between periodontitis-affected and healthy gingival tissues

Differential gene expression between periodontitis-affected and healthy gingival tissues was analyzed using read counts for each gene with the DeSeq package [22]. The analysis revealed a total of 453 significantly ( $\text{adj } p < 0.01$ ) differentially expressed genes. Additional analyses of genes expressed in periodontitis-affected

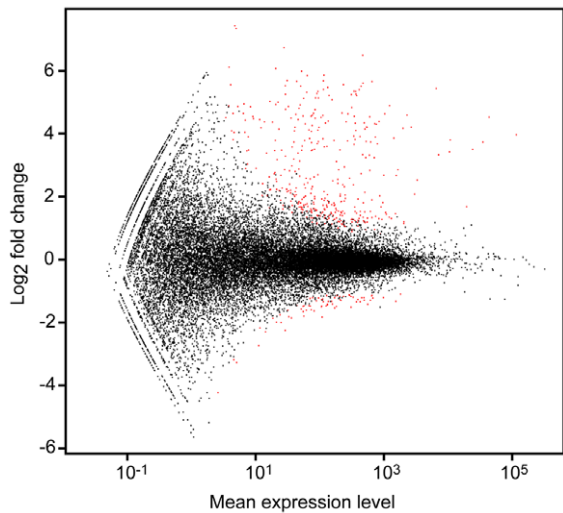

**Figure 5. Volcano plot displaying differential expression.** Differential gene expression (adj  $p < 0.01$ ) between periodontitis-affected and healthy gingival tissues. The y axis corresponds to the  $\log_2$  fold change value ( $M$  value), and the x axis displays the mean expression value. doi:10.1371/journal.pone.0046440.g005

gingiva, showed that 381 genes were upregulated, whereas 72 genes were shown to be down-regulated (Fig. 5, Table S2).

### Gene Ontology enrichment analysis of differentially expressed genes

Investigation of functional associations of gene expression changes in the tissue samples was performed using WebGestalt. Gene ontology (GO) Biological process was used for enrichment analysis. Significant gene enrichments ( $p < 0.05$ ) as well as their parent terms are demonstrated in Fig. 6. Several GO categories were over-represented among genes differentially expressed in periodontitis-affected versus healthy gingival tissues. The categories were mainly indicative of immune and inflammatory responses. Further enrichment analysis regarding Molecular function and Cellular components are provided in the supplementary data (Table S3).

### Top 50 upregulated genes in periodontitis-affected gingival tissue

The top 50 significantly upregulated genes in periodontitis-affected gingival tissue with Unigene entry are displayed in Table 4 together with Ensemble ID, gene symbol, fold change,  $\log_2$  fold

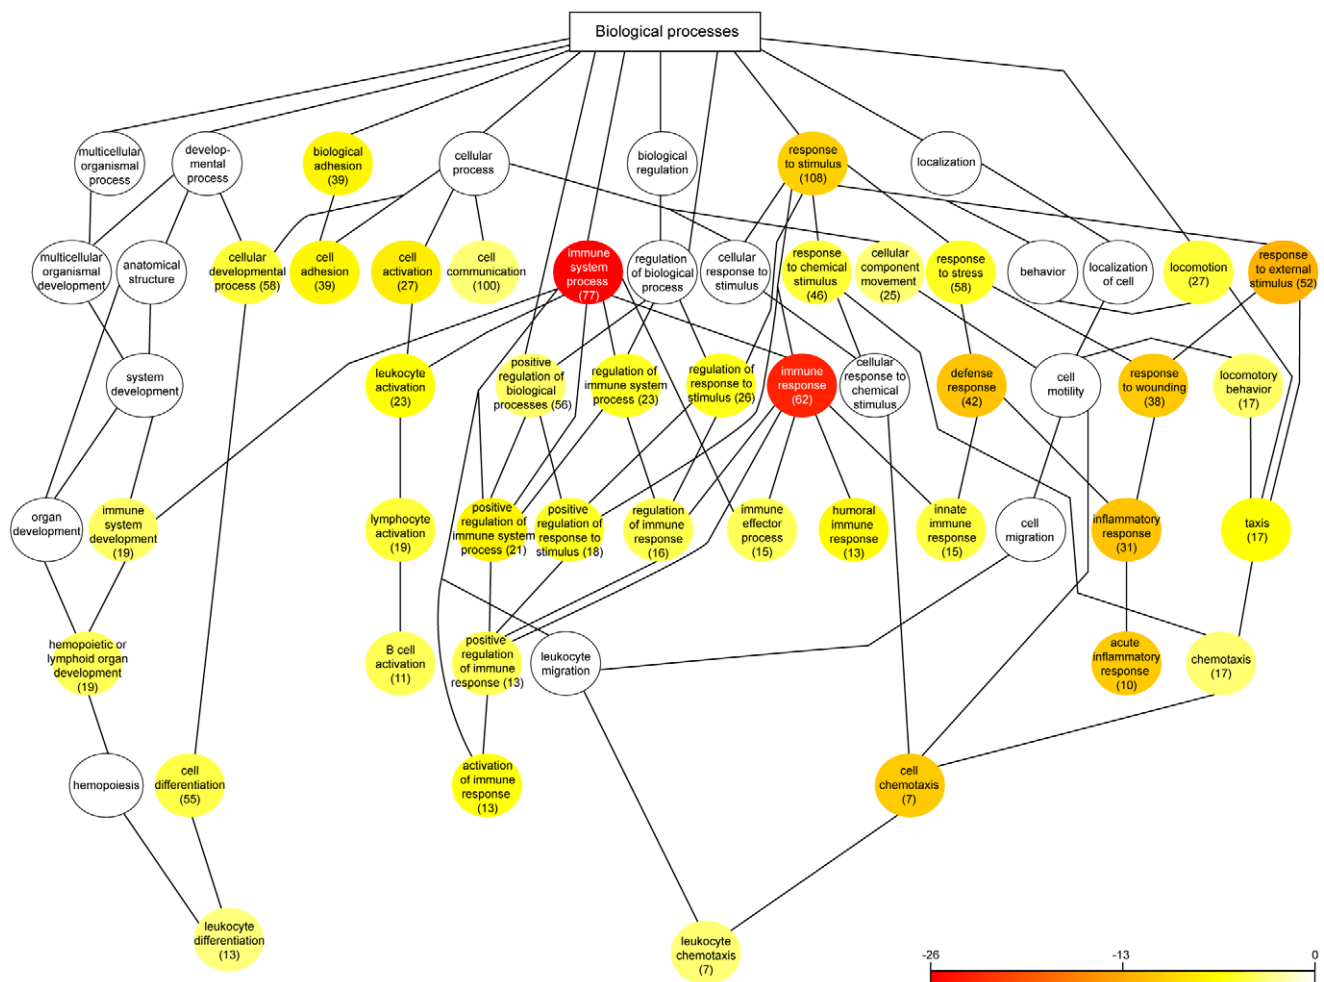

**Figure 6. Gene ontology (GO) analysis of differentially expressed genes.** All significant ( $p < 0.05$ ) Biological processes (GO categories) and their parent terms are shown. The color of each node illustrates the significance and can be interpreted using the scale bar, which displays the  $p$  value. Each node is also marked with the number of significantly regulated genes mapped to the GO category. doi:10.1371/journal.pone.0046440.g006

**Table 4.** Top 50 upregulated genes in periodontitis-affected tissue with Unigene entry.

| Ensemble ID     | Gene symbol | Description                                                                               | Fold change | Log <sub>2</sub> fold change | p value     |
|-----------------|-------------|-------------------------------------------------------------------------------------------|-------------|------------------------------|-------------|
| ENSG00000188596 | C12orf63    | chromosome 12 open reading frame 63                                                       | 69,15       | 6,11                         | 9,54e-06    |
| ENSG00000132704 | FCRL2       | Fc receptor-like 2                                                                        | 30,36       | 4,92                         | 1,39e-10    |
| ENSG00000143297 | FCRL5       | Fc receptor-like 5                                                                        | 25,24       | 4,66                         | 5,24e-30    |
| ENSG00000116748 | AMPD1       | adenosine monophosphate deaminase 1 (isoform M)                                           | 24,97       | 4,64                         | 5,58e-05    |
| ENSG00000187323 | DCC         | deleted in colorectal carcinoma                                                           | 20,69       | 4,37                         | 2,37e-09    |
| ENSG00000137265 | IRF4        | interferon regulatory factor 4                                                            | 20,10       | 4,33                         | 1,50e-32    |
| ENSG00000167077 | MEI1        | meiosis inhibitor 1                                                                       | 16,77       | 4,07                         | 3,24e-16    |
| ENSG00000101194 | SLC17A9     | solute carrier family 17, member 9                                                        | 14,40       | 3,85                         | 2,04e-14    |
| ENSG00000122188 | LAX1        | lymphocyte transmembrane adaptor 1                                                        | 14,28       | 3,84                         | 3,83e-20    |
| ENSG00000110777 | POU2AF1     | POU class 2 associating factor 1                                                          | 14,12       | 3,82                         | 9,81e-26    |
| ENSG00000124256 | ZBP1        | Z-DNA binding protein 1                                                                   | 13,76       | 3,78                         | 1,60e-14    |
| ENSG00000170476 | MGC29506    | hypothetical protein MGC29506                                                             | 13,33       | 3,74                         | 1,20e-21    |
| ENSG00000132185 | FCRLA       | Fc receptor-like A                                                                        | 12,18       | 3,61                         | 2,47e-11    |
| ENSG00000012223 | LTF         | lactotransferrin                                                                          | 12,09       | 3,61                         | 8,54e-22    |
| ENSG00000137673 | MMP7        | matrix metalloproteinase 7 (matrilysin, uterine)                                          | 11,37       | 3,51                         | 8,33e-18    |
| ENSG00000163534 | FCRL1       | Fc receptor-like 1                                                                        | 11,14       | 3,48                         | 1,54e-05    |
| ENSG00000177455 | CD19        | CD19 molecule                                                                             | 11,12       | 3,48                         | 2,13e-08    |
| ENSG00000061656 | SPAG4       | sperm associated antigen 4                                                                | 11,09       | 3,47                         | 1,62e-10    |
| ENSG00000121895 | TMEM156     | transmembrane protein 156                                                                 | 11,00       | 3,46                         | 2,35e-08    |
| ENSG00000015413 | DPEP1       | dipeptidase 1 (renal)                                                                     | 10,93       | 3,45                         | 8,81e-06    |
| ENSG00000048462 | TNFRSF17    | tumor necrosis factor receptor superfamily, member 17                                     | 10,43       | 3,38                         | 2,71e-08    |
| ENSG00000169962 | TAS1R3      | taste receptor, type 1, member 3                                                          | 10,42       | 3,38                         | 2,28e-06    |
| ENSG00000102096 | PIM2        | pim-2 oncogene                                                                            | 10,09       | 3,34                         | 2,43e-23    |
| ENSG00000183508 | FAM46C      | family with sequence similarity 46, member C                                              | 9,94        | 3,31                         | 2,19e-24    |
| ENSG00000168081 | PNOC        | prepronociceptin                                                                          | 9,75        | 3,29                         | 1,83e-07    |
| ENSG00000099958 | DERL3       | Der1-like domain family, member 3                                                         | 9,45        | 3,24                         | 2,26e-16    |
| ENSG00000105369 | CD79A       | CD79a molecule, immunoglobulin-associated alpha                                           | 9,43        | 3,24                         | 1,36e-18    |
| ENSG00000189233 | C8orf80     | chromosome 8 open reading frame 80                                                        | 9,03        | 3,17                         | 2,42e-07    |
| ENSG00000004468 | CD38        | CD38 molecule                                                                             | 8,75        | 3,13                         | 7,57e-10    |
| ENSG00000153789 | FAM92B      | family with sequence similarity 92, member B                                              | 8,21        | 3,04                         | 2,95e-05    |
| ENSG00000143603 | KCNN3       | potassium intermediate/small conductance calcium-activated channel, subfamily N, member 3 | 7,86        | 2,98                         | 3,81e-07    |
| ENSG00000007129 | CEACAM21    | carcinoembryonic antigen-related cell adhesion molecule 21                                | 7,48        | 2,90                         | 1,94e-05    |
| ENSG00000170866 | LILRA3      | leukocyte immunoglobulin-like receptor, subfamily A (without TM domain), member 3         | 7,45        | 2,90                         | 0,000111577 |
| ENSG00000129988 | LBP         | lipopolysaccharide binding protein                                                        | 7,33        | 2,87                         | 7,78e-08    |
| ENSG00000118308 | LRMP        | lymphoid-restricted membrane protein                                                      | 7,24        | 2,86                         | 7,08e-09    |
| ENSG00000139193 | CD27        | CD27 molecule                                                                             | 7,21        | 2,85                         | 4,63e-13    |
| ENSG00000073849 | ST6GAL1     | ST6 beta-galactosamide alpha-2,6-sialyltransferase 1                                      | 7,11        | 2,83                         | 4,37e-20    |
| ENSG00000177272 | KCNA3       | potassium voltage-gated channel, shaker-related subfamily, member 3                       | 7,07        | 2,82                         | 4,64e-08    |
| ENSG00000108405 | P2RX1       | purinergic receptor P2X, ligand-gated ion channel, 1                                      | 6,81        | 2,77                         | 3,18e-05    |
| ENSG00000026751 | SLAMF7      | SLAM family member 7                                                                      | 6,64        | 2,73                         | 2,05e-16    |
| ENSG00000124772 | CPNE5       | copine V                                                                                  | 6,47        | 2,69                         | 5,14e-10    |
| ENSG00000132465 | IGJ         | immunoglobulin J polypeptide, linker protein for immunoglobulin alpha and mu polypeptides | 6,41        | 2,68                         | 6,97e-21    |
| ENSG00000122224 | LY9         | lymphocyte antigen 9                                                                      | 6,39        | 2,68                         | 1,71e-06    |
| ENSG00000007312 | CD79B       | CD79b molecule, immunoglobulin-associated beta                                            | 6,28        | 2,65                         | 1,89e-07    |



**Table 4.** Cont.

| Ensemble ID     | Gene symbol | Description                                                          | Fold change | Log <sub>2</sub> fold change | p value  |
|-----------------|-------------|----------------------------------------------------------------------|-------------|------------------------------|----------|
| ENSG00000134873 | CLDN10      | claudin 10                                                           | 6,17        | 2,63                         | 2,82e-06 |
| ENSG00000172578 | KLHL6       | kelch-like 6 (Drosophila)                                            | 6,16        | 2,62                         | 1,98e-11 |
| ENSG00000196549 | MME         | membrane metallo-endopeptidase                                       | 6,01        | 2,59                         | 2,29e-16 |
| ENSG00000006074 | CCL18       | chemokine (C-C motif) ligand 18 (pulmonary and activation-regulated) | 6,00        | 2,59                         | 5,68e-10 |
| ENSG00000173432 | SAA1        | serum amyloid A1                                                     | 5,91        | 2,56                         | 7,97e-10 |
| ENSG00000159618 | GPR114      | G protein-coupled receptor 114                                       | 5,89        | 2,56                         | 1,29e-05 |

doi:10.1371/journal.pone.0046440.t004

change and *p* value. We investigated whether there were any available reports on the involvement of these genes in periodontitis or other chronic inflammatory conditions. Among the top 50 upregulated genes, we identified a number of candidate genes, which were not previously demonstrated to be involved in periodontitis but have been shown to be associated with other chronic conditions such as rheumatoid arthritis (RA). These candidate genes included FCRL5, adenosine monophosphate deaminase 1 (AMPD1), CCL18, tumor-necrosis factor receptor superfamily 17 (TNFRSF17) and leukocyte immunoglobulin-like receptor, subfamily A (without TM domain) member 3 (LILRA3), and IRF4 which has shown to be involved in chronic inflammatory diseases such as RA and inflammatory bowel disease (IBD), (Table 5).

#### The protein expression of IRF4 and CCL18 in periodontitis-affected tissue

The expression of two of the top 50 differentially upregulated genes, IRF4 and CCL18 were further investigated at the protein level in gingival tissue samples from five additional patients with periodontitis. Immunohistochemical analysis showed that the transcription factor IRF4 and the chemokine CCL18 were expressed at the protein level in gingival tissue from patients with periodontitis (Fig. 7). IRF4 protein was expressed in cells including fibroblasts and inflammatory cells in the gingival connective tissue, as shown by morphology. For the chemokine CCL18, cellular staining of fibroblasts and inflammatory cells was observed, as well

as some diffuse extracellular staining, consistent with chemokine secretion.

#### Discussion

This study provides a novel quantitative comprehensive mapping of gene expression in gingival tissues from patients diagnosed with periodontitis, using RNA-Seq.

We first confirmed that the degree of inflammation was higher in periodontitis-affected gingival tissue compared to healthy tissues obtained from the same individual. Our results were based on immunohistological staining of CD3 positive cells, and further verified by RNA-Seq quantification of gene expression of the established inflammatory markers IL-1 $\beta$ , IL-6, IL-8, TNF $\alpha$ , RANTES and MCP-1. These inflammatory mediators have previously been reported to be elevated in patients with periodontitis [25,26,27].

Next, we performed unsupervised clustering of the gingival tissues to get an overview of the data generated from the RNA-Seq analysis. Cluster analysis revealed that the majority of periodontitis-affected clustered together and the majority of the healthy gingival tissues also clustered together, which is in line with our results regarding inflammation in the tissues. The degree of inflammation, rather than the individual, seemed to affect the clustering, indicating a common gene expression profile for periodontitis. Our results, based on the gene expression pattern of the inflammatory markers (IL-1 $\beta$ , IL-6, IL-8, TNF $\alpha$ , RANTES and MCP-1) and the immunohistochemical evaluation, confirmed

**Table 5.** Selected upregulated genes identified in periodontitis and involved in other chronic inflammatory diseases.

| Ensemble ID     | Gene symbol | Description                                                                       | Fold change | Log <sub>2</sub> fold change | p value  | Involvement in other diseases    |
|-----------------|-------------|-----------------------------------------------------------------------------------|-------------|------------------------------|----------|----------------------------------|
| ENSG00000143297 | FCRL5       | Fc receptor-like 5                                                                | 25.24       | 4.66                         | 5.98e-27 | Rheumatoid arthritis (RA)        |
| ENSG00000116748 | AMPD1       | adenosine monophosphate deaminase 1                                               | 24.97       | 4.64                         | 0.0046   | Rheumatoid arthritis (RA)        |
| ENSG00000137265 | IRF4        | interferon regulatory factor 4                                                    | 20.10       | 4.33                         | 2.31e-29 | Inflammatory Bowel Disease (IBD) |
| ENSG00000048462 | TNFRSF17    | tumor necrosis factor receptor superfamily, member 17                             | 10.43       | 3.38                         | 4.80e-06 | Rheumatoid arthritis (RA)        |
| ENSG00000170866 | LILRA3      | leukocyte immunoglobulin-like receptor, subfamily A (without TM domain), member 3 | 7.45        | 2.90                         | 0.008037 | Rheumatoid arthritis (RA)        |
| ENSG00000006074 | CCL18       | chemokine (C-C motif) ligand 18 (pulmonary and activation-regulated)              | 6.00        | 2.59                         | 1.22e-07 | Rheumatoid arthritis (RA)        |

doi:10.1371/journal.pone.0046440.t005

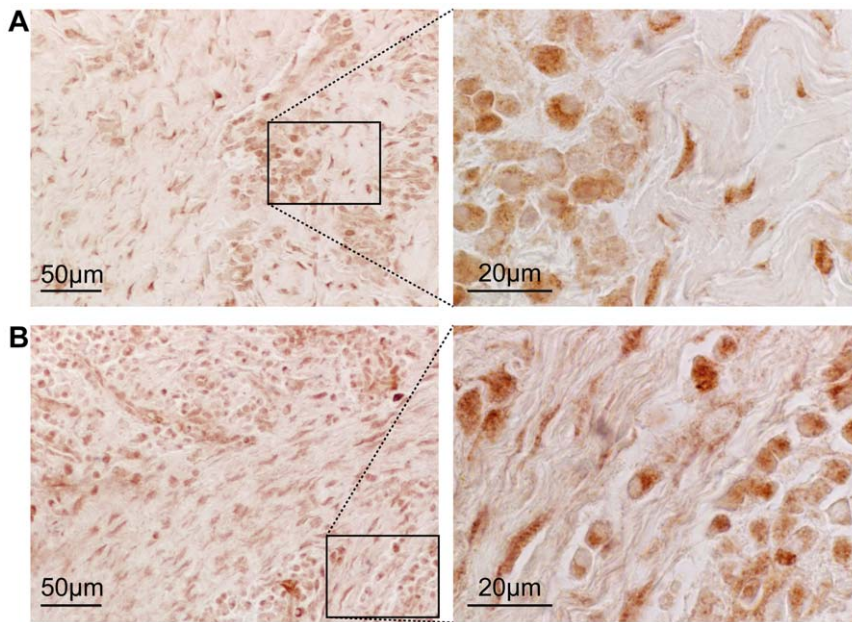

**Figure 7. Immunohistochemical stainings of IRF4 and CCL18 in the connective tissue of periodontitis-affected gingival sections. A.** Immunohistochemical staining of IRF4. **B.** Immunohistochemical staining of CCL18.  
doi:10.1371/journal.pone.0046440.g007

that the inflammation in periodontitis involves elevated levels of locally produced cytokines in the periodontium, as has been previously demonstrated [28]. However, cluster analysis revealed that three of the patients (patient no. 6, 7 and 2) deviated from the clustering pattern. For example, the healthy gingival tissue collected from patient 6 clustered with the periodontitis-affected tissue, which could be due to moderate inflammatory infiltration (H&E score 2) observed in the healthy gingival tissue. The clustering pattern in tissue from patient 7, where the healthy and diseased gingival tissue also clustered together, could be partly explained by the patient's history of osteoarthritis, which is a disease associated with elevated levels of circulating proinflammatory cytokines IL-6 and TNF $\alpha$  [29]. The cluster pattern for patient 2 differed from the rest of the patient group, which could be related to this patient undergoing investigation for the inflammatory disease sarcoidosis, and in turn might affect the systemic inflammatory response. Previous studies report that oral manifestations of sarcoidosis include aggressive destruction of the periodontium with rapid periodontal bone loss [30,31,32]. One of these studies also emphasizes the importance of patients diagnosed with sarcoidosis to be evaluated for other systemic involvements [31]. Thus, regarding our clustering pattern, it cannot be ruled out that general health differences might have some effect on the final outcome. However, the comparison of the gene expression profiles of all individuals should minimize potential interfering signals originating from single individuals affected with other diseases.

Our RNA-Seq analysis, investigating the gene expression profile in the gingival tissues showed that the genes were differentially distributed between healthy and periodontitis-affected samples. Enrichment analysis among uniquely expressed genes in the periodontitis-affected tissues showed regulated pathways indicative of inflammation, such as cytokine signaling, chemokine signaling and the JAK-STAT signaling pathway. Several cytokines such as interleukins, which are involved in periodontitis, signal through the JAK-STAT signaling pathway [33]. On the other hand, in the healthy biopsies, pathways were indicative of non-inflammatory

processes that may be involved in the maintenance of the healthy gingival tissue. Future studies should also include investigation of genes within these pathways, which may contribute to understanding, prevention and treatment of periodontitis.

Differential gene expression analyses of periodontitis-affected vs. healthy gingival tissues showed the majority of differentially expressed genes to be upregulated in the periodontitis-affected tissues. Furthermore, GO enrichment analysis among these differentially expressed genes demonstrated that most of these genes were involved in immune and inflammatory processes. This is in line with the increased inflammatory response in the tissue, and also in accordance with our previous microarray studies on inflammatory-stimulated cell cultures reporting that gene expression profiles of TNF $\alpha$ -stimulated cells show an induction of inflammatory genes [34,35].

Up to date, RNA-Seq studies aimed to identify new genes involved in the pathogenesis of periodontitis have not been reported. One *ab initio* study by Covani et al. [36] identified genes with potential roles in periodontitis, some of which have not previously been associated with the disease. However, the protein expression of these genes in periodontitis-affected tissues has not been confirmed. In our study we aimed to identify genes involved in the pathogenesis of periodontitis. Therefore, we further searched through the differentially expressed genes, focusing on the top 50 upregulated genes. Two of these 50 upregulated genes, IRF4 and CCL18, were also detected at the protein level in periodontitis affected-tissues, supporting these genes as novel finds in the pathogenesis of periodontitis. Furthermore, these two selected genes have been reported to be involved in other chronic inflammatory diseases such as RA. The transcription factor, IRF4, has been demonstrated to be involved in T-cell-dependent chronic inflammatory diseases such as IBD [37]. Mudter et al. 2011 reported a correlation between mRNA levels of IRF4 and production of cytokines such as IL-6 and IL-17 in the inflamed colon from patients with IBD, indicating that IRF4 is involved in the regulation of chronic mucosal inflammation [37]. In addition, the gene for CCL18 was upregulated in periodontitis-affected

gingival tissues. This chemokine, expressed by macrophages, monocytes and dendritic cells, has been demonstrated to be increased in synovial tissue of RA patients [38]. It has also been suggested that blockage of CCL18 expression by anti-TNF- $\alpha$  antibodies identifies CCL18 as an additional target for anti-TNF- $\alpha$  therapy in patients with RA [39,40]. Studies are currently ongoing to investigate the expression of candidate genes novel for periodontitis in a larger cohort of patients with periodontitis and healthy controls, to be able to evaluate their impact and to further explore the possible therapeutic targeting of these genes. In addition, future studies will also be performed investigating the biological significance of the down-regulated genes in periodontitis.

In conclusion, we demonstrate for the first time, using RNA-seq, profile analysis of periodontitis revealing site-specific local variation in gene expression profiles of periodontitis-affected and healthy tissues obtained from patients diagnosed with periodontitis. Furthermore, we have identified differentially expressed novel genes in gingival tissue of periodontitis. Our findings provide a first step towards a quantitative comprehensive insight into the transcriptome of gingival tissue from patients with periodontitis, to enable identification of possible diagnostic markers of periodontitis as well as potential therapeutic targets.

## References

- Feng Z, Weinberg A (2006) Role of bacteria in health and disease of periodontal tissues. *Periodontol* 2000 40: 50–76.
- Mahanonda R, Pichyangkul S (2007) Toll-like receptors and their role in periodontal health and disease. *Periodontol* 2000 43: 41–55.
- Sorsa T, Tjaderhane L, Kontinen YT, Lauhio A, Salo T, et al. (2006) Matrix metalloproteinases: contribution to pathogenesis, diagnosis and treatment of periodontal inflammation. *Ann Med* 38: 306–321.
- Papapanou PN, Abiron A, Verbitsky M, Pocolos D, Yang J, et al. (2004) Gene expression signatures in chronic and aggressive periodontitis: a pilot study. *Eur J Oral Sci* 112: 216–223.
- Kim DM, Ramoni MF, Nevins M, Fiorellini JP (2006) The gene expression profile in refractory periodontitis patients. *J Periodontol* 77: 1043–1050.
- Demmer RT, Behle JH, Wolf DL, Handfield M, Kebschull M, et al. (2008) Transcriptomes in healthy and diseased gingival tissues. *J Periodontol* 79: 2112–2124.
- Beikler T, Peters U, Prior K, Eisenacher M, Flemmig TF (2008) Gene expression in periodontal tissues following treatment. *BMC Med Genomics* 1: 30.
- Wang PL, Ohura K, Fujii T, Oido-Mori M, Kowashi Y, et al. (2003) DNA microarray analysis of human gingival fibroblasts from healthy and inflammatory gingival tissues. *Biochem Biophys Res Commun* 305: 970–973.
- Kurashige Y, Saitoh M, Nishimura M, Noro D, Kaku T, et al. (2008) Profiling of differentially expressed genes in porcine epithelial cells derived from periodontal ligament and gingiva by DNA microarray. *Arch Oral Biol* 53: 437–442.
- Steinberg T, Dannewitz B, Tomakidi P, Hoheisel JD, Mussig E, et al. (2006) Analysis of interleukin-1 $\beta$ -modulated mRNA gene transcription in human gingival keratinocytes by epithelia-specific cDNA microarrays. *J Periodontol Res* 41: 426–446.
- Schaefer AS, Richter GM, Nothnagel M, Manke T, Dommisch H, et al. (2010) A genome-wide association study identifies GLT6D1 as a susceptibility locus for periodontitis. *Hum Mol Genet* 19: 553–562.
- Twine NA, Janitz K, Wilkins MR, Janitz M (2011) Whole transcriptome sequencing reveals gene expression and splicing differences in brain regions affected by Alzheimer's disease. *PLoS One* 6: e16266.
- Richard H, Schulz MH, Richard H, Magen M, Nurnberger A, Schinnerer S, et al. (2010) Prediction of alternative isoforms from exon expression levels in RNA-Seq experiments. *Nucleic Acids Res* 38: e112.
- Sultan M, Schulz MH, Richard H, Magen A, Klingenhoff A, et al. (2008) A global view of gene activity and alternative splicing by deep sequencing of the human transcriptome. *Science* 321: 956–960.
- Lang NP, Joss A, Orsanic T, Gusberti FA, Siegrist BE (1986) Bleeding on probing. A predictor for the progression of periodontal disease? *J Clin Periodontol* 13: 590–596.
- Armitage GC (1996) Periodontal diseases: diagnosis. *Ann Periodontol* 1: 37–215.
- Tu YK, Gilthorpe MS, Griffiths GS, Maddick IH, Eaton KA, et al. (2004) The application of multilevel modeling in the analysis of longitudinal periodontal data—part I: absolute levels of disease. *J Periodontol* 75: 127–136.
- Stranneheim H, Werne B, Sherwood E, Lundeberg J (2011) Scalable transcriptome preparation for massive parallel sequencing. *PLoS One* 6: e21910.
- Langmead B, Trapnell C, Pop M, Salzberg SL (2009) Ultrafast and memory-efficient alignment of short DNA sequences to the human genome. *Genome Biol* 10: R25.
- Trapnell C, Pachter L, Salzberg SL (2009) TopHat: discovering splice junctions with RNA-Seq. *Bioinformatics* 25: 1105–1111.
- Li H, Handsaker B, Wysoker A, Fennell T, Ruan J, et al. (2009) The Sequence Alignment/Map format and SAMtools. *Bioinformatics* 25: 2078–2079.
- Anders S, Huber W (2010) Differential expression analysis for sequence count data. *Genome Biol* 11: R106.
- Zhang B, Kirov S, Snoddy J (2005) WebGestalt: an integrated system for exploring gene sets in various biological contexts. *Nucleic Acids Res* 33: W741–748.
- Web-based gene set analysis toolkit. Available: <http://bioinfo.vanderbilt.edu/webgestalt>. Accessed 2012 Aug 10.
- Gamonal J, Acevedo A, Bascones A, Jorge O, Silva A (2000) Levels of interleukin-1 beta, -8, and -10 and RANTES in gingival crevicular fluid and cell populations in adult periodontitis patients and the effect of periodontal treatment. *J Periodontol* 71: 1535–1545.
- Pradeep AR, Daisy H, Hadge P, Garg G, Thorat M (2009) Correlation of gingival crevicular fluid interleukin-18 and monocyte chemoattractant protein-1 levels in periodontal health and disease. *J Periodontol* 80: 1454–1461.
- Passoja A, Puijola I, Knuutila M, Niemela O, Karttunen R, et al. (2010) Serum levels of interleukin-10 and tumour necrosis factor- $\alpha$  in chronic periodontitis. *J Clin Periodontol* 37: 881–887.
- Dasanayake AP (2010) Periodontal disease is related to local and systemic mediators of inflammation. *J Evid Based Dent Pract* 10: 246–247.
- Stannus O, Jones G, Cicuttini F, Parameswaran V, Quinn S, et al. (2010) Circulating levels of IL-6 and TNF- $\alpha$  are associated with knee radiographic osteoarthritis and knee cartilage loss in older adults. *Osteoarthritis Cartilage* 18: 1441–1447.
- Cohen C, Krutchkoff D, Eisenberg E (1981) Systemic sarcoidosis: report of two cases with oral lesions. *J Oral Surg* 39: 613–618.
- Suresh L, Aguirre A, Buhite RJ, Radfar L (2004) Intraosseous sarcoidosis of the jaws mimicking aggressive periodontitis: a case report and literature review. *J Periodontol* 75: 478–482.
- Moretti AJ, Fiocchi MF, Flaitz CM (2007) Sarcoidosis affecting the periodontium: a long-term follow-up case. *J Periodontol* 78: 2209–2215.
- Hanada T, Yoshimura A (2002) Regulation of cytokine signaling and inflammation. *Cytokine Growth Factor Rev* 13: 413–421.
- Davanian H, Bage T, Lindberg J, Lundeberg J, Concha HQ, et al. (2012) Signaling pathways involved in the regulation of TNF $\alpha$ -induced toll-like receptor 2 expression in human gingival fibroblasts. *Cytokine* 57: 406–416.
- Bage T, Lindberg J, Lundeberg J, Modeer T, Yucel-Lindberg T (2010) Signal pathways JNK and NF- $\kappa$ B, identified by global gene expression profiling, are involved in regulation of TNF $\alpha$ -induced mPGES-1 and COX-2 expression in gingival fibroblasts. *BMC Genomics* 11: 241.
- Covani U, Marconcini S, Giacomelli L, Sivozhelevov V, Barone A, et al. (2008) Bioinformatic prediction of leader genes in human periodontitis. *J Periodontol* 79: 1974–1983.

## Supporting Information

**Table S1 Uniquely expressed genes within enriched pathways in periodontitis-affected and healthy gingival tissues.** (XLSX)

**Table S2 Full list of all significantly differentially expressed genes in periodontitis-affected and healthy gingival tissues.** (XLSX)

**Table S3 Gene Ontology enrichment analysis of differentially expressed genes.** (XLSX)

## Acknowledgments

We wish to thank Dr. Rachael Sugars for editing English-language and Nilminie Rathnayake for contributing to the collection of gingival biopsies.

## Author Contributions

Conceived and designed the experiments: HD HS TB JL TYL. Performed the experiments: HD HS ML. Analyzed the data: HD HS TB JL TYL. Contributed reagents/materials/analysis tools: ML LJ JL TYL. Wrote the paper: HD HS TB ML LJ TYL.

37. Mudter J, Yu J, Zufferey C, Brustle A, Wirtz S, et al. (2011) IRF4 regulates IL-17A promoter activity and controls ROR $\gamma$ mat-dependent Th17 colitis in vivo. *Inflamm Bowel Dis* 17: 1343–1358.
38. Momohara S, Okamoto H, Iwamoto T, Mizumura T, Ikari K, et al. (2007) High CCL18/PARC expression in articular cartilage and synovial tissue of patients with rheumatoid arthritis. *J Rheumatol* 34: 266–271.
39. Haringman JJ, Smeets TJ, Reinders-Blankert P, Tak PP (2006) Chemokine and chemokine receptor expression in paired peripheral blood mononuclear cells and synovial tissue of patients with rheumatoid arthritis, osteoarthritis, and reactive arthritis. *Ann Rheum Dis* 65: 294–300.
40. Auer J, Blass M, Schulze-Koops H, Russwurm S, Nagel T, et al. (2007) Expression and regulation of CCL18 in synovial fluid neutrophils of patients with rheumatoid arthritis. *Arthritis Res Ther* 9: R94.
