# Supplementary material for: Gene Expression Profiles in Paired Gingival Biopsies from Periodontitis-Affected and Healthy Tissues Revealed by Massively Parallel Sequencing
Source: PLoS One. 2012 Sep 28;7(9):e46440. doi: 10.1371/journal.pone.0046440 (PMC3460903; doi:10.1371/journal.pone.0046440)
Supplement: Table S1 — Uniquely expressed genes within enriched pathways in periodontitis-affected and healthy gingival tissues. (XLSX) [file pone.0046440.s001.xlsx]

## Sheet: Periodontitis unique genes
Uniquely expressed genes within enriched pathways in periodontitis-affected gingival tissues.
Neuroactive ligand-receptor interaction----04080
C=256;O=19;E=2.52;R=7.53;rawP=1.46e-11;adjP=8.18e-10
Ensembl Gene stable ID	Gene symbol	Description
ENSG00000135312	HTR1B	5-hydroxytryptamine (serotonin) receptor 1B
ENSG00000126010	GRPR	gastrin-releasing peptide receptor
ENSG00000112164	GLP1R	glucagon-like peptide 1 receptor
ENSG00000101188	NTSR1	neurotensin receptor 1 (high affinity)
ENSG00000176884	GRIN1	glutamate receptor, ionotropic, N-methyl D-aspartate 1
ENSG00000171596	NMUR1	neuromedin U receptor 1
ENSG00000166603	MC4R	melanocortin 4 receptor
ENSG00000171189	GRIK1	glutamate receptor, ionotropic, kainate 1
ENSG00000145451	GLRA3	glycine receptor, alpha 3
ENSG00000179097	HTR1F	5-hydroxytryptamine (serotonin) receptor 1F
ENSG00000179603	GRM8	glutamate receptor, metabotropic 8
ENSG00000134489	HRH4	histamine receptor H4
ENSG00000183473	SSTR3	somatostatin receptor 3
ENSG00000113262	GRM6	glutamate receptor, metabotropic 6
ENSG00000182687	GALR2	galanin receptor 2
ENSG00000171873	ADRA1D	adrenergic, alpha-1D-, receptor
ENSG00000104826	LHB	luteinizing hormone beta polypeptide
ENSG00000123901	GPR83	G protein-coupled receptor 83
ENSG00000109158	GABRA4	gamma-aminobutyric acid (GABA) A receptor, alpha 4
Cytokine-cytokine receptor interaction----04060
C=267;O=18;E=2.63;R=6.84;rawP=2.41e-10;adjP=6.75e-09
ENSG00000108688	CCL7	chemokine (C-C motif) ligand 7
ENSG00000184451	CCR10	chemokine (C-C motif) receptor 10
ENSG00000167236	CCL23	chemokine (C-C motif) ligand 23
ENSG00000135409	AMHR2	anti-Mullerian hormone receptor, type II
ENSG00000115705	TPO	thyroid peroxidase
ENSG00000164400	CSF2	colony stimulating factor 2 (granulocyte-macrophage)
ENSG00000117400	MPL	myeloproliferative leukemia virus oncogene
ENSG00000128438	TNFRSF13B	tumor necrosis factor receptor superfamily, member 13B
ENSG00000183625	CCR3	chemokine (C-C motif) receptor 3
ENSG00000111536	IL26	interleukin 26
ENSG00000186827	TNFRSF4	tumor necrosis factor receptor superfamily, member 4
ENSG00000164485	IL22RA2	interleukin 22 receptor, alpha 2
ENSG00000163737	PF4	platelet factor 4
ENSG00000112115	IL17A	interleukin 17A
ENSG00000172156	CCL11	chemokine (C-C motif) ligand 11
ENSG00000162594	IL23R	interleukin 23 receptor
ENSG00000131142	CCL25	chemokine (C-C motif) ligand 25
ENSG00000163736	PPBP	pro-platelet basic protein (chemokine (C-X-C motif) ligand 7)
Chemokine signaling pathway----04062
C=190;O=10;E=1.87;R=5.34;rawP=2.16e-05;adjP=0.0004
ENSG00000108688	CCL7	chemokine (C-C motif) ligand 7
ENSG00000184451	CCR10	chemokine (C-C motif) receptor 10
ENSG00000167236	CCL23	chemokine (C-C motif) ligand 23
ENSG00000183625	CCR3	chemokine (C-C motif) receptor 3
ENSG00000127588	GNG13	guanine nucleotide binding protein (G protein), gamma 13
ENSG00000163737	PF4	platelet factor 4
ENSG00000172156	CCL11	chemokine (C-C motif) ligand 11
ENSG00000114124	GRK7	G protein-coupled receptor kinase 7
ENSG00000163736	PPBP	pro-platelet basic protein (chemokine (C-X-C motif) ligand 7)
ENSG00000131142	CCL25	chemokine (C-C motif) ligand 25
Intestinal immune network for IgA production----04672
C=50;O=5;E=0.49;R=10.14;rawP=0.0001;adjP=0.0014
ENSG00000121594	CD80	CD80 molecule
ENSG00000184451	CCR10	chemokine (C-C motif) receptor 10
ENSG00000162896	PIGR	polymeric immunoglobulin receptor
ENSG00000128438	TNFRSF13B	tumor necrosis factor receptor superfamily, member 13B
ENSG00000131142	CCL25	chemokine (C-C motif) ligand 25
Alanine, aspartate and glutamate metabolism----00250
C=31;O=4;E=0.31;R=13.09;rawP=0.0002;adjP=0.0022
ENSG00000132744	ACY3	aspartoacylase (aminocyclase) 3
ENSG00000172482	AGXT	alanine-glyoxylate aminotransferase
ENSG00000182890	GLUD2	glutamate dehydrogenase 2
ENSG00000203797	DDO	D-aspartate oxidase
Tyrosine metabolism----00350
C=46;O=4;E=0.45;R=8.82;rawP=0.0011;adjP=0.0103
ENSG00000123454	DBH	dopamine beta-hydroxylase (dopamine beta-monooxygenase)
ENSG00000158104	HPD	4-hydroxyphenylpyruvate dioxygenase
ENSG00000180176	TH	tyrosine hydroxylase
ENSG00000115705	TPO	thyroid peroxidase
Calcium signaling pathway----04020
C=178;O=7;E=1.75;R=3.99;rawP=0.0020;adjP=0.0160
ENSG00000175344	CHRNA7	cholinergic receptor, nicotinic, alpha 7
ENSG00000102001	CACNA1F	calcium channel, voltage-dependent, L type, alpha 1F subunit
ENSG00000126583	PRKCG	protein kinase C, gamma
ENSG00000126010	GRPR	gastrin-releasing peptide receptor
ENSG00000171873	ADRA1D	adrenergic, alpha-1D-, receptor
ENSG00000101188	NTSR1	neurotensin receptor 1 (high affinity)
ENSG00000176884	GRIN1	glutamate receptor, ionotropic, N-methyl D-aspartate 1
Hedgehog signaling pathway----04340
C=56;O=4;E=0.55;R=7.24;rawP=0.0023;adjP=0.0161
ENSG00000125084	WNT1	wingless-type MMTV integration site family, member 1
ENSG00000183682	BMP8A	bone morphogenetic protein 8a
ENSG00000115596	WNT6	wingless-type MMTV integration site family, member 6
ENSG00000158955	WNT9B	wingless-type MMTV integration site family, member 9B
Systemic lupus erythematosus----05322
C=140;O=6;E=1.38;R=4.35;rawP=0.0027;adjP=0.0168
ENSG00000176919	C8G	complement component 8, gamma polypeptide
ENSG00000197697	HIST1H2BE	histone cluster 1, H2be
ENSG00000121594	CD80	CD80 molecule
ENSG00000196966	HIST1H3E	histone cluster 1, H3e
ENSG00000077522	ACTN2	actinin, alpha 2
ENSG00000233822	HIST1H2BN	histone cluster 1, H2bn
Glycine, serine and threonine metabolism----00260
C=31;O=3;E=0.31;R=9.82;rawP=0.0035;adjP=0.0196
ENSG00000132837	DMGDH	dimethylglycine dehydrogenase
ENSG00000145692	BHMT	betaine-homocysteine methyltransferase
ENSG00000172482	AGXT	alanine-glyoxylate aminotransferase
Jak-STAT signaling pathway----04630
C=155;O=6;E=1.53;R=3.93;rawP=0.0045;adjP=0.0229
ENSG00000115705	TPO	thyroid peroxidase
ENSG00000164485	IL22RA2	interleukin 22 receptor, alpha 2
ENSG00000164400	CSF2	colony stimulating factor 2 (granulocyte-macrophage)
ENSG00000117400	MPL	myeloproliferative leukemia virus oncogene
ENSG00000162594	IL23R	interleukin 23 receptor
ENSG00000111536	IL26	interleukin 26
Vascular smooth muscle contraction----04270
C=115;O=5;E=1.13;R=4.41;rawP=0.0058;adjP=0.0271
ENSG00000102001	CACNA1F	calcium channel, voltage-dependent, L type, alpha 1F subunit
ENSG00000187048	CYP4A11	cytochrome P450, family 4, subfamily A, polypeptide 11
ENSG00000126583	PRKCG	protein kinase C, gamma
ENSG00000171873	ADRA1D	adrenergic, alpha-1D-, receptor
ENSG00000162365	CYP4A22	cytochrome P450, family 4, subfamily A, polypeptide 22
Arrhythmogenic right ventricular cardiomyopathy (ARVC)----05412
C=76;O=4;E=0.75;R=5.34;rawP=0.0068;adjP=0.0293
ENSG00000102001	CACNA1F	calcium channel, voltage-dependent, L type, alpha 1F subunit
ENSG00000077522	ACTN2	actinin, alpha 2
ENSG00000066032	CTNNA2	catenin (cadherin-associated protein), alpha 2
ENSG00000130433	CACNG6	calcium channel, voltage-dependent, gamma subunit 6

## Sheet: Healthy unique genes
Uniquely expressed genes within enriched pathways in healthy gingival tissues.
Neuroactive ligand-receptor interaction----04080
C=256;O=11;E=0.97;R=11.39;rawP=4.47e-09;adjP=7.60e-08
Ensembl Gene stable ID	Gene symbol	Description
ENSG00000152822	GRM1	glutamate receptor, metabotropic 1
ENSG00000082556	OPRK1	opioid receptor, kappa 1
ENSG00000152208	GRID2	glutamate receptor, ionotropic, delta 2
ENSG00000136928	GABBR2	gamma-aminobutyric acid (GABA) B receptor, 2
ENSG00000056291	NPFFR2	neuropeptide FF receptor 2
ENSG00000183729	NPBWR1	neuropeptides B/W receptor 1
ENSG00000043591	ADRB1	adrenergic, beta-1-, receptor
ENSG00000186297	GABRA5	gamma-aminobutyric acid (GABA) A receptor, alpha 5
ENSG00000169836	TACR3	tachykinin receptor 3
ENSG00000164128	NPY1R	neuropeptide Y receptor Y1
ENSG00000150086	GRIN2B	glutamate receptor, ionotropic, N-methyl D-aspartate 2B
Glycolysis / Gluconeogenesis----00010
C=62;O=3;E=0.23;R=12.83;rawP=0.0017;adjP=0.0145
ENSG00000163114	PDHA2	pyruvate dehydrogenase (lipoamide) alpha 2
ENSG00000196616	ADH1B	alcohol dehydrogenase 1B (class I), beta polypeptide
ENSG00000166796	LDHC	lactate dehydrogenase C
Calcium signaling pathway----04020
C=178;O=4;E=0.67;R=5.96;rawP=0.0047;adjP=0.0208
ENSG00000152822	GRM1	glutamate receptor, metabotropic 1
ENSG00000067842	ATP2B3	ATPase, Ca++ transporting, plasma membrane 3
ENSG00000169836	TACR3	tachykinin receptor 3
ENSG00000043591	ADRB1	adrenergic, beta-1-, receptor
Gap junction----04540
C=90;O=3;E=0.34;R=8.84;rawP=0.0049;adjP=0.0208
ENSG00000152822	GRM1	glutamate receptor, metabotropic 1
ENSG00000152086	TUBA3E	tubulin, alpha 3e
ENSG00000043591	ADRB1	adrenergic, beta-1-, receptor
Pyruvate metabolism----00620
C=40;O=2;E=0.15;R=13.26;rawP=0.0100;adjP=0.0283
ENSG00000163114	PDHA2	pyruvate dehydrogenase (lipoamide) alpha 2
ENSG00000166796	LDHC	lactate dehydrogenase C
Tryptophan metabolism----00380
C=40;O=2;E=0.15;R=13.26;rawP=0.0100;adjP=0.0283
ENSG00000129167	TPH1	tryptophan hydroxylase 1
ENSG00000129673	AANAT	arylalkylamine N-acetyltransferase
