# Supplementary material for: Gene Expression Profiles in Paired Gingival Biopsies from Periodontitis-Affected and Healthy Tissues Revealed by Massively Parallel Sequencing
Source: PLoS One. 2012 Sep 28;7(9):e46440. doi: 10.1371/journal.pone.0046440 (PMC3460903; doi:10.1371/journal.pone.0046440)
Supplement: Table S3 — Gene Ontology enrichment analysis of differentially expressed genes. (XLSX) [file pone.0046440.s003.xlsx]

## Sheet: Biological process
Gene Ontology enrichment analysis (Biological process) of differentially expressed genes.
immune system process----GO:0002376
C=1066;O=77;E=17.58;R=4.38;rawP=3.80e-30;adjP=4.04e-27
Ensembl Gene stable ID	Gene symbol	Description
ENSG00000160683	CXCR5	chemokine (C-X-C motif) receptor 5
ENSG00000131042	LILRB2	leukocyte immunoglobulin-like receptor, subfamily B (with TM and ITIM domains), member 2
ENSG00000000971	CFH	complement factor H
ENSG00000132465	IGJ	immunoglobulin J polypeptide, linker protein for immunoglobulin alpha and mu polypeptides
ENSG00000026751	SLAMF7	SLAM family member 7
ENSG00000142224	IL19	interleukin 19
ENSG00000174123	TLR10	toll-like receptor 10
ENSG00000173432	SAA1	serum amyloid A1
ENSG00000134516	DOCK2	dedicator of cytokinesis 2
ENSG00000012223	LTF	lactotransferrin
ENSG00000141968	VAV1	vav 1 guanine nucleotide exchange factor
ENSG00000197943	PLCG2	phospholipase C, gamma 2 (phosphatidylinositol-specific)
ENSG00000102879	CORO1A	coronin, actin binding protein, 1A
ENSG00000028277	POU2F2	POU class 2 homeobox 2
ENSG00000165168	CYBB	cytochrome b-245, beta polypeptide
ENSG00000110777	POU2AF1	POU class 2 associating factor 1
ENSG00000125730	C3	complement component 3
ENSG00000005844	ITGAL	integrin, alpha L (antigen CD11A (p180), lymphocyte function-associated antigen 1; alpha polypeptide)
ENSG00000100365	NCF4	neutrophil cytosolic factor 4, 40kDa
ENSG00000124875	CXCL6	chemokine (C-X-C motif) ligand 6 (granulocyte chemotactic protein 2)
ENSG00000170866	LILRA3	leukocyte immunoglobulin-like receptor, subfamily A (without TM domain), member 3
ENSG00000170458	CD14	CD14 molecule
ENSG00000162747	FCGR3B	Fc fragment of IgG, low affinity IIIb, receptor (CD16b)
ENSG00000156738	MS4A1	membrane-spanning 4-domains, subfamily A, member 1
ENSG00000082074	FYB	FYN binding protein (FYB-120/130)
ENSG00000163735	CXCL5	chemokine (C-X-C motif) ligand 5
ENSG00000160255	ITGB2	integrin, beta 2 (complement component 3 receptor 3 and 4 subunit)
ENSG00000173372	C1QA	complement component 1, q subcomponent, A chain
ENSG00000051523	CYBA	cytochrome b-245, alpha polypeptide
ENSG00000177455	CD19	CD19 molecule
ENSG00000115919	KYNU	kynureninase (L-kynurenine hydrolase)
ENSG00000169429	IL8	interleukin 8
ENSG00000163739	CXCL1	chemokine (C-X-C motif) ligand 1 (melanoma growth stimulating activity, alpha)
ENSG00000129988	LBP	lipopolysaccharide binding protein
ENSG00000134460	IL2RA	interleukin 2 receptor, alpha
ENSG00000167613	LAIR1	leukocyte-associated immunoglobulin-like receptor 1
ENSG00000125810	CD93	CD93 molecule
ENSG00000100985	MMP9	matrix metallopeptidase 9 (gelatinase B, 92kDa gelatinase, 92kDa type IV collagenase)
ENSG00000174175	SELP	selectin P (granule membrane protein 140kDa, antigen CD62)
ENSG00000073849	ST6GAL1	ST6 beta-galactosamide alpha-2,6-sialyltranferase 1
ENSG00000090376	IRAK3	interleukin-1 receptor-associated kinase 3
ENSG00000107807	TLX1	T-cell leukemia homeobox 1
ENSG00000139193	CD27	CD27 molecule
ENSG00000100625	SIX4	SIX homeobox 4
ENSG00000090104	RGS1	regulator of G-protein signaling 1
ENSG00000134061	CD180	CD180 molecule
ENSG00000105369	CD79A	CD79a molecule, immunoglobulin-associated alpha
ENSG00000108342	CSF3	colony stimulating factor 3 (granulocyte)
ENSG00000137265	IRF4	interferon regulatory factor 4
ENSG00000172349	IL16	interleukin 16 (lymphocyte chemoattractant factor)
ENSG00000163131	CTSS	cathepsin S
ENSG00000122224	LY9	lymphocyte antigen 9
ENSG00000137077	CCL21	chemokine (C-C motif) ligand 21
ENSG00000122188	LAX1	lymphocyte transmembrane adaptor 1
ENSG00000107562	CXCL12	chemokine (C-X-C motif) ligand 12 (stromal cell-derived factor 1)
ENSG00000136960	ENPP2	ectonucleotide pyrophosphatase/phosphodiesterase 2
ENSG00000196092	PAX5	paired box 5
ENSG00000072694	FCGR2B	Fc fragment of IgG, low affinity IIb, receptor (CD32)
ENSG00000156234	CXCL13	chemokine (C-X-C motif) ligand 13
ENSG00000205403	CFI	complement factor I
ENSG00000007312	CD79B	CD79b molecule, immunoglobulin-associated beta
ENSG00000147168	IL2RG	interleukin 2 receptor, gamma (severe combined immunodeficiency)
ENSG00000004468	CD38	CD38 molecule
ENSG00000168421	RHOH	ras homolog gene family, member H
ENSG00000081237	PTPRC	protein tyrosine phosphatase, receptor type, C
ENSG00000104894	CD37	CD37 molecule
ENSG00000121966	CXCR4	chemokine (C-X-C motif) receptor 4
ENSG00000153064	BANK1	B-cell scaffold protein with ankyrin repeats 1
ENSG00000180353	HCLS1	hematopoietic cell-specific Lyn substrate 1
ENSG00000168685	IL7R	interleukin 7 receptor
ENSG00000100867	DHRS2	dehydrogenase/reductase (SDR family) member 2
ENSG00000203710	CR1	complement component (3b/4b) receptor 1 (Knops blood group)
ENSG00000100219	XBP1	X-box binding protein 1
ENSG00000182326	C1S	complement component 1, s subcomponent
ENSG00000125378	BMP4	bone morphogenetic protein 4
ENSG00000048462	TNFRSF17	tumor necrosis factor receptor superfamily, member 17
ENSG00000006074	CCL18	chemokine (C-C motif) ligand 18 (pulmonary and activation-regulated)
immune response----GO:0006955
C=750;O=62;E=12.37;R=5.01;rawP=4.42e-27;adjP=2.35e-24
ENSG00000131042	LILRB2	leukocyte immunoglobulin-like receptor, subfamily B (with TM and ITIM domains), member 2
ENSG00000000971	CFH	complement factor H
ENSG00000073849	ST6GAL1	ST6 beta-galactosamide alpha-2,6-sialyltranferase 1
ENSG00000090376	IRAK3	interleukin-1 receptor-associated kinase 3
ENSG00000132465	IGJ	immunoglobulin J polypeptide, linker protein for immunoglobulin alpha and mu polypeptides
ENSG00000026751	SLAMF7	SLAM family member 7
ENSG00000142224	IL19	interleukin 19
ENSG00000174123	TLR10	toll-like receptor 10
ENSG00000139193	CD27	CD27 molecule
ENSG00000012223	LTF	lactotransferrin
ENSG00000090104	RGS1	regulator of G-protein signaling 1
ENSG00000141968	VAV1	vav 1 guanine nucleotide exchange factor
ENSG00000134061	CD180	CD180 molecule
ENSG00000172349	IL16	interleukin 16 (lymphocyte chemoattractant factor)
ENSG00000137265	IRF4	interferon regulatory factor 4
ENSG00000108342	CSF3	colony stimulating factor 3 (granulocyte)
ENSG00000105369	CD79A	CD79a molecule, immunoglobulin-associated alpha
ENSG00000122224	LY9	lymphocyte antigen 9
ENSG00000163131	CTSS	cathepsin S
ENSG00000197943	PLCG2	phospholipase C, gamma 2 (phosphatidylinositol-specific)
ENSG00000137077	CCL21	chemokine (C-C motif) ligand 21
ENSG00000122188	LAX1	lymphocyte transmembrane adaptor 1
ENSG00000107562	CXCL12	chemokine (C-X-C motif) ligand 12 (stromal cell-derived factor 1)
ENSG00000102879	CORO1A	coronin, actin binding protein, 1A
ENSG00000028277	POU2F2	POU class 2 homeobox 2
ENSG00000136960	ENPP2	ectonucleotide pyrophosphatase/phosphodiesterase 2
ENSG00000196092	PAX5	paired box 5
ENSG00000165168	CYBB	cytochrome b-245, beta polypeptide
ENSG00000110777	POU2AF1	POU class 2 associating factor 1
ENSG00000125730	C3	complement component 3
ENSG00000072694	FCGR2B	Fc fragment of IgG, low affinity IIb, receptor (CD32)
ENSG00000005844	ITGAL	integrin, alpha L (antigen CD11A (p180), lymphocyte function-associated antigen 1; alpha polypeptide)
ENSG00000100365	NCF4	neutrophil cytosolic factor 4, 40kDa
ENSG00000156234	CXCL13	chemokine (C-X-C motif) ligand 13
ENSG00000205403	CFI	complement factor I
ENSG00000147168	IL2RG	interleukin 2 receptor, gamma (severe combined immunodeficiency)
ENSG00000007312	CD79B	CD79b molecule, immunoglobulin-associated beta
ENSG00000124875	CXCL6	chemokine (C-X-C motif) ligand 6 (granulocyte chemotactic protein 2)
ENSG00000170866	LILRA3	leukocyte immunoglobulin-like receptor, subfamily A (without TM domain), member 3
ENSG00000170458	CD14	CD14 molecule
ENSG00000162747	FCGR3B	Fc fragment of IgG, low affinity IIIb, receptor (CD16b)
ENSG00000156738	MS4A1	membrane-spanning 4-domains, subfamily A, member 1
ENSG00000082074	FYB	FYN binding protein (FYB-120/130)
ENSG00000081237	PTPRC	protein tyrosine phosphatase, receptor type, C
ENSG00000163735	CXCL5	chemokine (C-X-C motif) ligand 5
ENSG00000104894	CD37	CD37 molecule
ENSG00000121966	CXCR4	chemokine (C-X-C motif) receptor 4
ENSG00000173372	C1QA	complement component 1, q subcomponent, A chain
ENSG00000051523	CYBA	cytochrome b-245, alpha polypeptide
ENSG00000168685	IL7R	interleukin 7 receptor
ENSG00000177455	CD19	CD19 molecule
ENSG00000115919	KYNU	kynureninase (L-kynurenine hydrolase)
ENSG00000203710	CR1	complement component (3b/4b) receptor 1 (Knops blood group)
ENSG00000100219	XBP1	X-box binding protein 1
ENSG00000169429	IL8	interleukin 8
ENSG00000163739	CXCL1	chemokine (C-X-C motif) ligand 1 (melanoma growth stimulating activity, alpha)
ENSG00000182326	C1S	complement component 1, s subcomponent
ENSG00000129988	LBP	lipopolysaccharide binding protein
ENSG00000134460	IL2RA	interleukin 2 receptor, alpha
ENSG00000048462	TNFRSF17	tumor necrosis factor receptor superfamily, member 17
ENSG00000167613	LAIR1	leukocyte-associated immunoglobulin-like receptor 1
ENSG00000006074	CCL18	chemokine (C-C motif) ligand 18 (pulmonary and activation-regulated)
response to external stimulus----GO:0009605
C=904;O=52;E=14.91;R=3.49;rawP=1.05e-15;adjP=3.72e-13
ENSG00000019186	CYP24A1	cytochrome P450, family 24, subfamily A, polypeptide 1
ENSG00000108405	P2RX1	purinergic receptor P2X, ligand-gated ion channel, 1
ENSG00000000971	CFH	complement factor H
ENSG00000174175	SELP	selectin P (granule membrane protein 140kDa, antigen CD62)
ENSG00000090382	LYZ	lysozyme (renal amyloidosis)
ENSG00000010327	STAB1	stabilin 1
ENSG00000174123	TLR10	toll-like receptor 10
ENSG00000173432	SAA1	serum amyloid A1
ENSG00000104368	PLAT	plasminogen activator, tissue
ENSG00000134516	DOCK2	dedicator of cytokinesis 2
ENSG00000175040	CHST2	carbohydrate (N-acetylglucosamine-6-O) sulfotransferase 2
ENSG00000134061	CD180	CD180 molecule
ENSG00000172349	IL16	interleukin 16 (lymphocyte chemoattractant factor)
ENSG00000128340	RAC2	ras-related C3 botulinum toxin substrate 2 (rho family, small GTP binding protein Rac2)
ENSG00000183691	NOG	noggin
ENSG00000119699	TGFB3	transforming growth factor, beta 3
ENSG00000133800	LYVE1	lymphatic vessel endothelial hyaluronan receptor 1
ENSG00000137077	CCL21	chemokine (C-C motif) ligand 21
ENSG00000107562	CXCL12	chemokine (C-X-C motif) ligand 12 (stromal cell-derived factor 1)
ENSG00000102879	CORO1A	coronin, actin binding protein, 1A
ENSG00000177575	CD163	CD163 molecule
ENSG00000136960	ENPP2	ectonucleotide pyrophosphatase/phosphodiesterase 2
ENSG00000165168	CYBB	cytochrome b-245, beta polypeptide
ENSG00000125730	C3	complement component 3
ENSG00000005844	ITGAL	integrin, alpha L (antigen CD11A (p180), lymphocyte function-associated antigen 1; alpha polypeptide)
ENSG00000156234	CXCL13	chemokine (C-X-C motif) ligand 13
ENSG00000145423	SFRP2	secreted frizzled-related protein 2
ENSG00000205403	CFI	complement factor I
ENSG00000171051	FPR1	formyl peptide receptor 1
ENSG00000124875	CXCL6	chemokine (C-X-C motif) ligand 6 (granulocyte chemotactic protein 2)
ENSG00000170458	CD14	CD14 molecule
ENSG00000004468	CD38	CD38 molecule
ENSG00000057019	DCBLD2	discoidin, CUB and LCCL domain containing 2
ENSG00000163735	CXCL5	chemokine (C-X-C motif) ligand 5
ENSG00000160255	ITGB2	integrin, beta 2 (complement component 3 receptor 3 and 4 subunit)
ENSG00000121966	CXCR4	chemokine (C-X-C motif) receptor 4
ENSG00000173372	C1QA	complement component 1, q subcomponent, A chain
ENSG00000051523	CYBA	cytochrome b-245, alpha polypeptide
ENSG00000117215	PLA2G2D	phospholipase A2, group IID
ENSG00000152208	GRID2	glutamate receptor, ionotropic, delta 2
ENSG00000115919	KYNU	kynureninase (L-kynurenine hydrolase)
ENSG00000038427	VCAN	versican
ENSG00000203710	CR1	complement component (3b/4b) receptor 1 (Knops blood group)
ENSG00000169429	IL8	interleukin 8
ENSG00000163739	CXCL1	chemokine (C-X-C motif) ligand 1 (melanoma growth stimulating activity, alpha)
ENSG00000182326	C1S	complement component 1, s subcomponent
ENSG00000125378	BMP4	bone morphogenetic protein 4
ENSG00000159184	HOXB13	homeobox B13
ENSG00000129988	LBP	lipopolysaccharide binding protein
ENSG00000134460	IL2RA	interleukin 2 receptor, alpha
ENSG00000006074	CCL18	chemokine (C-C motif) ligand 18 (pulmonary and activation-regulated)
ENSG00000170323	FABP4	fatty acid binding protein 4, adipocyte
defense response----GO:0006952
C=657;O=42;E=10.84;R=3.88;rawP=2.76e-14;adjP=7.33e-12
ENSG00000131042	LILRB2	leukocyte immunoglobulin-like receptor, subfamily B (with TM and ITIM domains), member 2
ENSG00000108405	P2RX1	purinergic receptor P2X, ligand-gated ion channel, 1
ENSG00000000971	CFH	complement factor H
ENSG00000174175	SELP	selectin P (granule membrane protein 140kDa, antigen CD62)
ENSG00000090376	IRAK3	interleukin-1 receptor-associated kinase 3
ENSG00000090382	LYZ	lysozyme (renal amyloidosis)
ENSG00000026751	SLAMF7	SLAM family member 7
ENSG00000010327	STAB1	stabilin 1
ENSG00000174123	TLR10	toll-like receptor 10
ENSG00000173432	SAA1	serum amyloid A1
ENSG00000012223	LTF	lactotransferrin
ENSG00000175040	CHST2	carbohydrate (N-acetylglucosamine-6-O) sulfotransferase 2
ENSG00000134061	CD180	CD180 molecule
ENSG00000137077	CCL21	chemokine (C-C motif) ligand 21
ENSG00000102879	CORO1A	coronin, actin binding protein, 1A
ENSG00000177575	CD163	CD163 molecule
ENSG00000148677	ANKRD1	ankyrin repeat domain 1 (cardiac muscle)
ENSG00000165168	CYBB	cytochrome b-245, beta polypeptide
ENSG00000125730	C3	complement component 3
ENSG00000005844	ITGAL	integrin, alpha L (antigen CD11A (p180), lymphocyte function-associated antigen 1; alpha polypeptide)
ENSG00000156234	CXCL13	chemokine (C-X-C motif) ligand 13
ENSG00000205403	CFI	complement factor I
ENSG00000124875	CXCL6	chemokine (C-X-C motif) ligand 6 (granulocyte chemotactic protein 2)
ENSG00000170866	LILRA3	leukocyte immunoglobulin-like receptor, subfamily A (without TM domain), member 3
ENSG00000170458	CD14	CD14 molecule
ENSG00000101336	HCK	hemopoietic cell kinase
ENSG00000081237	PTPRC	protein tyrosine phosphatase, receptor type, C
ENSG00000160255	ITGB2	integrin, beta 2 (complement component 3 receptor 3 and 4 subunit)
ENSG00000121966	CXCR4	chemokine (C-X-C motif) receptor 4
ENSG00000173372	C1QA	complement component 1, q subcomponent, A chain
ENSG00000051523	CYBA	cytochrome b-245, alpha polypeptide
ENSG00000117215	PLA2G2D	phospholipase A2, group IID
ENSG00000177455	CD19	CD19 molecule
ENSG00000115919	KYNU	kynureninase (L-kynurenine hydrolase)
ENSG00000203710	CR1	complement component (3b/4b) receptor 1 (Knops blood group)
ENSG00000169429	IL8	interleukin 8
ENSG00000163739	CXCL1	chemokine (C-X-C motif) ligand 1 (melanoma growth stimulating activity, alpha)
ENSG00000182326	C1S	complement component 1, s subcomponent
ENSG00000129988	LBP	lipopolysaccharide binding protein
ENSG00000134460	IL2RA	interleukin 2 receptor, alpha
ENSG00000006074	CCL18	chemokine (C-C motif) ligand 18 (pulmonary and activation-regulated)
ENSG00000170323	FABP4	fatty acid binding protein 4, adipocyte
inflammatory response----GO:0006954
C=359;O=31;E=5.92;R=5.24;rawP=3.62e-14;adjP=7.69e-12
ENSG00000125730	C3	complement component 3
ENSG00000005844	ITGAL	integrin, alpha L (antigen CD11A (p180), lymphocyte function-associated antigen 1; alpha polypeptide)
ENSG00000108405	P2RX1	purinergic receptor P2X, ligand-gated ion channel, 1
ENSG00000156234	CXCL13	chemokine (C-X-C motif) ligand 13
ENSG00000000971	CFH	complement factor H
ENSG00000174175	SELP	selectin P (granule membrane protein 140kDa, antigen CD62)
ENSG00000205403	CFI	complement factor I
ENSG00000090382	LYZ	lysozyme (renal amyloidosis)
ENSG00000124875	CXCL6	chemokine (C-X-C motif) ligand 6 (granulocyte chemotactic protein 2)
ENSG00000010327	STAB1	stabilin 1
ENSG00000170458	CD14	CD14 molecule
ENSG00000174123	TLR10	toll-like receptor 10
ENSG00000173432	SAA1	serum amyloid A1
ENSG00000175040	CHST2	carbohydrate (N-acetylglucosamine-6-O) sulfotransferase 2
ENSG00000160255	ITGB2	integrin, beta 2 (complement component 3 receptor 3 and 4 subunit)
ENSG00000134061	CD180	CD180 molecule
ENSG00000121966	CXCR4	chemokine (C-X-C motif) receptor 4
ENSG00000173372	C1QA	complement component 1, q subcomponent, A chain
ENSG00000051523	CYBA	cytochrome b-245, alpha polypeptide
ENSG00000117215	PLA2G2D	phospholipase A2, group IID
ENSG00000203710	CR1	complement component (3b/4b) receptor 1 (Knops blood group)
ENSG00000169429	IL8	interleukin 8
ENSG00000163739	CXCL1	chemokine (C-X-C motif) ligand 1 (melanoma growth stimulating activity, alpha)
ENSG00000137077	CCL21	chemokine (C-C motif) ligand 21
ENSG00000182326	C1S	complement component 1, s subcomponent
ENSG00000134460	IL2RA	interleukin 2 receptor, alpha
ENSG00000129988	LBP	lipopolysaccharide binding protein
ENSG00000177575	CD163	CD163 molecule
ENSG00000006074	CCL18	chemokine (C-C motif) ligand 18 (pulmonary and activation-regulated)
ENSG00000165168	CYBB	cytochrome b-245, beta polypeptide
ENSG00000170323	FABP4	fatty acid binding protein 4, adipocyte
response to wounding----GO:0009611
C=560;O=38;E=9.24;R=4.11;rawP=8.62e-14;adjP=1.53e-11
ENSG00000108405	P2RX1	purinergic receptor P2X, ligand-gated ion channel, 1
ENSG00000000971	CFH	complement factor H
ENSG00000174175	SELP	selectin P (granule membrane protein 140kDa, antigen CD62)
ENSG00000090382	LYZ	lysozyme (renal amyloidosis)
ENSG00000010327	STAB1	stabilin 1
ENSG00000174123	TLR10	toll-like receptor 10
ENSG00000173432	SAA1	serum amyloid A1
ENSG00000104368	PLAT	plasminogen activator, tissue
ENSG00000175040	CHST2	carbohydrate (N-acetylglucosamine-6-O) sulfotransferase 2
ENSG00000134061	CD180	CD180 molecule
ENSG00000183691	NOG	noggin
ENSG00000119699	TGFB3	transforming growth factor, beta 3
ENSG00000133800	LYVE1	lymphatic vessel endothelial hyaluronan receptor 1
ENSG00000137077	CCL21	chemokine (C-C motif) ligand 21
ENSG00000177575	CD163	CD163 molecule
ENSG00000165168	CYBB	cytochrome b-245, beta polypeptide
ENSG00000125730	C3	complement component 3
ENSG00000005844	ITGAL	integrin, alpha L (antigen CD11A (p180), lymphocyte function-associated antigen 1; alpha polypeptide)
ENSG00000156234	CXCL13	chemokine (C-X-C motif) ligand 13
ENSG00000205403	CFI	complement factor I
ENSG00000124875	CXCL6	chemokine (C-X-C motif) ligand 6 (granulocyte chemotactic protein 2)
ENSG00000170458	CD14	CD14 molecule
ENSG00000057019	DCBLD2	discoidin, CUB and LCCL domain containing 2
ENSG00000160255	ITGB2	integrin, beta 2 (complement component 3 receptor 3 and 4 subunit)
ENSG00000121966	CXCR4	chemokine (C-X-C motif) receptor 4
ENSG00000051523	CYBA	cytochrome b-245, alpha polypeptide
ENSG00000173372	C1QA	complement component 1, q subcomponent, A chain
ENSG00000117215	PLA2G2D	phospholipase A2, group IID
ENSG00000038427	VCAN	versican
ENSG00000203710	CR1	complement component (3b/4b) receptor 1 (Knops blood group)
ENSG00000169429	IL8	interleukin 8
ENSG00000163739	CXCL1	chemokine (C-X-C motif) ligand 1 (melanoma growth stimulating activity, alpha)
ENSG00000182326	C1S	complement component 1, s subcomponent
ENSG00000159184	HOXB13	homeobox B13
ENSG00000129988	LBP	lipopolysaccharide binding protein
ENSG00000134460	IL2RA	interleukin 2 receptor, alpha
ENSG00000006074	CCL18	chemokine (C-C motif) ligand 18 (pulmonary and activation-regulated)
ENSG00000170323	FABP4	fatty acid binding protein 4, adipocyte
response to stimulus----GO:0050896
C=3471;O=108;E=57.25;R=1.89;rawP=3.29e-13;adjP=4.99e-11
ENSG00000019186	CYP24A1	cytochrome P450, family 24, subfamily A, polypeptide 1
ENSG00000131042	LILRB2	leukocyte immunoglobulin-like receptor, subfamily B (with TM and ITIM domains), member 2
ENSG00000108405	P2RX1	purinergic receptor P2X, ligand-gated ion channel, 1
ENSG00000000971	CFH	complement factor H
ENSG00000077943	ITGA8	integrin, alpha 8
ENSG00000132465	IGJ	immunoglobulin J polypeptide, linker protein for immunoglobulin alpha and mu polypeptides
ENSG00000026751	SLAMF7	SLAM family member 7
ENSG00000142224	IL19	interleukin 19
ENSG00000010327	STAB1	stabilin 1
ENSG00000174123	TLR10	toll-like receptor 10
ENSG00000173432	SAA1	serum amyloid A1
ENSG00000104368	PLAT	plasminogen activator, tissue
ENSG00000134516	DOCK2	dedicator of cytokinesis 2
ENSG00000012223	LTF	lactotransferrin
ENSG00000175040	CHST2	carbohydrate (N-acetylglucosamine-6-O) sulfotransferase 2
ENSG00000141968	VAV1	vav 1 guanine nucleotide exchange factor
ENSG00000197943	PLCG2	phospholipase C, gamma 2 (phosphatidylinositol-specific)
ENSG00000183691	NOG	noggin
ENSG00000133800	LYVE1	lymphatic vessel endothelial hyaluronan receptor 1
ENSG00000102879	CORO1A	coronin, actin binding protein, 1A
ENSG00000171345	KRT19	keratin 19
ENSG00000028277	POU2F2	POU class 2 homeobox 2
ENSG00000177575	CD163	CD163 molecule
ENSG00000148677	ANKRD1	ankyrin repeat domain 1 (cardiac muscle)
ENSG00000165168	CYBB	cytochrome b-245, beta polypeptide
ENSG00000110777	POU2AF1	POU class 2 associating factor 1
ENSG00000125730	C3	complement component 3
ENSG00000005844	ITGAL	integrin, alpha L (antigen CD11A (p180), lymphocyte function-associated antigen 1; alpha polypeptide)
ENSG00000099958	DERL3	Der1-like domain family, member 3
ENSG00000100365	NCF4	neutrophil cytosolic factor 4, 40kDa
ENSG00000145423	SFRP2	secreted frizzled-related protein 2
ENSG00000171051	FPR1	formyl peptide receptor 1
ENSG00000124875	CXCL6	chemokine (C-X-C motif) ligand 6 (granulocyte chemotactic protein 2)
ENSG00000170866	LILRA3	leukocyte immunoglobulin-like receptor, subfamily A (without TM domain), member 3
ENSG00000170458	CD14	CD14 molecule
ENSG00000162747	FCGR3B	Fc fragment of IgG, low affinity IIIb, receptor (CD16b)
ENSG00000101336	HCK	hemopoietic cell kinase
ENSG00000156738	MS4A1	membrane-spanning 4-domains, subfamily A, member 1
ENSG00000082074	FYB	FYN binding protein (FYB-120/130)
ENSG00000057019	DCBLD2	discoidin, CUB and LCCL domain containing 2
ENSG00000160255	ITGB2	integrin, beta 2 (complement component 3 receptor 3 and 4 subunit)
ENSG00000163735	CXCL5	chemokine (C-X-C motif) ligand 5
ENSG00000173372	C1QA	complement component 1, q subcomponent, A chain
ENSG00000051523	CYBA	cytochrome b-245, alpha polypeptide
ENSG00000149968	MMP3	matrix metallopeptidase 3 (stromelysin 1, progelatinase)
ENSG00000115919	KYNU	kynureninase (L-kynurenine hydrolase)
ENSG00000177455	CD19	CD19 molecule
ENSG00000169429	IL8	interleukin 8
ENSG00000054356	PTPRN	protein tyrosine phosphatase, receptor type, N
ENSG00000169962	TAS1R3	taste receptor, type 1, member 3
ENSG00000163739	CXCL1	chemokine (C-X-C motif) ligand 1 (melanoma growth stimulating activity, alpha)
ENSG00000176890	TYMS	thymidylate synthetase
ENSG00000134460	IL2RA	interleukin 2 receptor, alpha
ENSG00000129988	LBP	lipopolysaccharide binding protein
ENSG00000167613	LAIR1	leukocyte-associated immunoglobulin-like receptor 1
ENSG00000170323	FABP4	fatty acid binding protein 4, adipocyte
ENSG00000114854	TNNC1	troponin C type 1 (slow)
ENSG00000174175	SELP	selectin P (granule membrane protein 140kDa, antigen CD62)
ENSG00000164938	TP53INP1	tumor protein p53 inducible nuclear protein 1
ENSG00000073849	ST6GAL1	ST6 beta-galactosamide alpha-2,6-sialyltranferase 1
ENSG00000117724	CENPF	centromere protein F, 350/400ka (mitosin)
ENSG00000090376	IRAK3	interleukin-1 receptor-associated kinase 3
ENSG00000090382	LYZ	lysozyme (renal amyloidosis)
ENSG00000139193	CD27	CD27 molecule
ENSG00000090104	RGS1	regulator of G-protein signaling 1
ENSG00000134061	CD180	CD180 molecule
ENSG00000172349	IL16	interleukin 16 (lymphocyte chemoattractant factor)
ENSG00000137265	IRF4	interferon regulatory factor 4
ENSG00000108342	CSF3	colony stimulating factor 3 (granulocyte)
ENSG00000128340	RAC2	ras-related C3 botulinum toxin substrate 2 (rho family, small GTP binding protein Rac2)
ENSG00000105369	CD79A	CD79a molecule, immunoglobulin-associated alpha
ENSG00000122224	LY9	lymphocyte antigen 9
ENSG00000163131	CTSS	cathepsin S
ENSG00000151012	SLC7A11	solute carrier family 7, (cationic amino acid transporter, y+ system) member 11
ENSG00000101210	EEF1A2	eukaryotic translation elongation factor 1 alpha 2
ENSG00000119699	TGFB3	transforming growth factor, beta 3
ENSG00000137077	CCL21	chemokine (C-C motif) ligand 21
ENSG00000122188	LAX1	lymphocyte transmembrane adaptor 1
ENSG00000107562	CXCL12	chemokine (C-X-C motif) ligand 12 (stromal cell-derived factor 1)
ENSG00000136960	ENPP2	ectonucleotide pyrophosphatase/phosphodiesterase 2
ENSG00000196092	PAX5	paired box 5
ENSG00000072694	FCGR2B	Fc fragment of IgG, low affinity IIb, receptor (CD32)
ENSG00000058335	RASGRF1	Ras protein-specific guanine nucleotide-releasing factor 1
ENSG00000156234	CXCL13	chemokine (C-X-C motif) ligand 13
ENSG00000205403	CFI	complement factor I
ENSG00000147168	IL2RG	interleukin 2 receptor, gamma (severe combined immunodeficiency)
ENSG00000007312	CD79B	CD79b molecule, immunoglobulin-associated beta
ENSG00000004468	CD38	CD38 molecule
ENSG00000051108	HERPUD1	homocysteine-inducible, endoplasmic reticulum stress-inducible, ubiquitin-like domain member 1
ENSG00000081237	PTPRC	protein tyrosine phosphatase, receptor type, C
ENSG00000104894	CD37	CD37 molecule
ENSG00000121966	CXCR4	chemokine (C-X-C motif) receptor 4
ENSG00000104814	MAP4K1	mitogen-activated protein kinase kinase kinase kinase 1
ENSG00000180353	HCLS1	hematopoietic cell-specific Lyn substrate 1
ENSG00000168685	IL7R	interleukin 7 receptor
ENSG00000117215	PLA2G2D	phospholipase A2, group IID
ENSG00000100867	DHRS2	dehydrogenase/reductase (SDR family) member 2
ENSG00000152208	GRID2	glutamate receptor, ionotropic, delta 2
ENSG00000038427	VCAN	versican
ENSG00000203710	CR1	complement component (3b/4b) receptor 1 (Knops blood group)
ENSG00000100219	XBP1	X-box binding protein 1
ENSG00000198794	SCAMP5	secretory carrier membrane protein 5
ENSG00000182326	C1S	complement component 1, s subcomponent
ENSG00000125378	BMP4	bone morphogenetic protein 4
ENSG00000159184	HOXB13	homeobox B13
ENSG00000048462	TNFRSF17	tumor necrosis factor receptor superfamily, member 17
ENSG00000006074	CCL18	chemokine (C-C motif) ligand 18 (pulmonary and activation-regulated)
ENSG00000158125	XDH	xanthine dehydrogenase
cell activation----GO:0001775
C=366;O=27;E=6.04;R=4.47;rawP=7.06e-11;adjP=9.37e-09
ENSG00000160683	CXCR5	chemokine (C-X-C motif) receptor 5
ENSG00000125810	CD93	CD93 molecule
ENSG00000005844	ITGAL	integrin, alpha L (antigen CD11A (p180), lymphocyte function-associated antigen 1; alpha polypeptide)
ENSG00000108405	P2RX1	purinergic receptor P2X, ligand-gated ion channel, 1
ENSG00000174175	SELP	selectin P (granule membrane protein 140kDa, antigen CD62)
ENSG00000147168	IL2RG	interleukin 2 receptor, gamma (severe combined immunodeficiency)
ENSG00000026751	SLAMF7	SLAM family member 7
ENSG00000004468	CD38	CD38 molecule
ENSG00000173432	SAA1	serum amyloid A1
ENSG00000139193	CD27	CD27 molecule
ENSG00000168421	RHOH	ras homolog gene family, member H
ENSG00000134516	DOCK2	dedicator of cytokinesis 2
ENSG00000156738	MS4A1	membrane-spanning 4-domains, subfamily A, member 1
ENSG00000081237	PTPRC	protein tyrosine phosphatase, receptor type, C
ENSG00000141968	VAV1	vav 1 guanine nucleotide exchange factor
ENSG00000137265	IRF4	interferon regulatory factor 4
ENSG00000105369	CD79A	CD79a molecule, immunoglobulin-associated alpha
ENSG00000153064	BANK1	B-cell scaffold protein with ankyrin repeats 1
ENSG00000168685	IL7R	interleukin 7 receptor
ENSG00000100867	DHRS2	dehydrogenase/reductase (SDR family) member 2
ENSG00000197943	PLCG2	phospholipase C, gamma 2 (phosphatidylinositol-specific)
ENSG00000169429	IL8	interleukin 8
ENSG00000172867	KRT2	keratin 2
ENSG00000122188	LAX1	lymphocyte transmembrane adaptor 1
ENSG00000102879	CORO1A	coronin, actin binding protein, 1A
ENSG00000129988	LBP	lipopolysaccharide binding protein
ENSG00000134460	IL2RA	interleukin 2 receptor, alpha
positive regulation of immune system process----GO:0002684
C=229;O=21;E=3.78;R=5.56;rawP=1.99e-10;adjP=2.35e-08
ENSG00000125730	C3	complement component 3
ENSG00000000971	CFH	complement factor H
ENSG00000205403	CFI	complement factor I
ENSG00000147168	IL2RG	interleukin 2 receptor, gamma (severe combined immunodeficiency)
ENSG00000090376	IRAK3	interleukin-1 receptor-associated kinase 3
ENSG00000004468	CD38	CD38 molecule
ENSG00000139193	CD27	CD27 molecule
ENSG00000081237	PTPRC	protein tyrosine phosphatase, receptor type, C
ENSG00000104894	CD37	CD37 molecule
ENSG00000105369	CD79A	CD79a molecule, immunoglobulin-associated alpha
ENSG00000173372	C1QA	complement component 1, q subcomponent, A chain
ENSG00000168685	IL7R	interleukin 7 receptor
ENSG00000177455	CD19	CD19 molecule
ENSG00000203710	CR1	complement component (3b/4b) receptor 1 (Knops blood group)
ENSG00000197943	PLCG2	phospholipase C, gamma 2 (phosphatidylinositol-specific)
ENSG00000182326	C1S	complement component 1, s subcomponent
ENSG00000122188	LAX1	lymphocyte transmembrane adaptor 1
ENSG00000107562	CXCL12	chemokine (C-X-C motif) ligand 12 (stromal cell-derived factor 1)
ENSG00000129988	LBP	lipopolysaccharide binding protein
ENSG00000134460	IL2RA	interleukin 2 receptor, alpha
ENSG00000102879	CORO1A	coronin, actin binding protein, 1A
biological adhesion----GO:0022610
C=786;O=39;E=12.96;R=3.01;rawP=5.71e-10;adjP=5.51e-08
ENSG00000187689	AMTN	amelotin
ENSG00000125810	CD93	CD93 molecule
ENSG00000115165	CYTIP	cytohesin 1 interacting protein
ENSG00000136040	PLXNC1	plexin C1
ENSG00000130775	C1orf38	chromosome 1 open reading frame 38
ENSG00000174175	SELP	selectin P (granule membrane protein 140kDa, antigen CD62)
ENSG00000077943	ITGA8	integrin, alpha 8
ENSG00000026751	SLAMF7	SLAM family member 7
ENSG00000010327	STAB1	stabilin 1
ENSG00000173432	SAA1	serum amyloid A1
ENSG00000101680	LAMA1	laminin, alpha 1
ENSG00000091129	NRCAM	neuronal cell adhesion molecule
ENSG00000145681	HAPLN1	hyaluronan and proteoglycan link protein 1
ENSG00000141968	VAV1	vav 1 guanine nucleotide exchange factor
ENSG00000122224	LY9	lymphocyte antigen 9
ENSG00000145113	MUC4	mucin 4, cell surface associated
ENSG00000012124	CD22	CD22 molecule
ENSG00000133800	LYVE1	lymphatic vessel endothelial hyaluronan receptor 1
ENSG00000107562	CXCL12	chemokine (C-X-C motif) ligand 12 (stromal cell-derived factor 1)
ENSG00000102879	CORO1A	coronin, actin binding protein, 1A
ENSG00000171914	TLN2	talin 2
ENSG00000197410	DCHS2	dachsous 2 (Drosophila)
ENSG00000005844	ITGAL	integrin, alpha L (antigen CD11A (p180), lymphocyte function-associated antigen 1; alpha polypeptide)
ENSG00000104415	WISP1	WNT1 inducible signaling pathway protein 1
ENSG00000076662	ICAM3	intercellular adhesion molecule 3
ENSG00000108622	ICAM2	intercellular adhesion molecule 2
ENSG00000091128	LAMB4	laminin, beta 4
ENSG00000057019	DCBLD2	discoidin, CUB and LCCL domain containing 2
ENSG00000081237	PTPRC	protein tyrosine phosphatase, receptor type, C
ENSG00000160255	ITGB2	integrin, beta 2 (complement component 3 receptor 3 and 4 subunit)
ENSG00000133110	POSTN	periostin, osteoblast specific factor
ENSG00000038427	VCAN	versican
ENSG00000169429	IL8	interleukin 8
ENSG00000204291	COL15A1	collagen, type XV, alpha 1
ENSG00000170558	CDH2	cadherin 2, type 1, N-cadherin (neuronal)
ENSG00000134765	DSC1	desmocollin 1
ENSG00000198910	L1CAM	L1 cell adhesion molecule
ENSG00000198759	EGFL6	EGF-like-domain, multiple 6
ENSG00000134873	CLDN10	claudin 10
cell adhesion----GO:0007155
C=785;O=39;E=12.95;R=3.01;rawP=5.51e-10;adjP=5.51e-08
ENSG00000187689	AMTN	amelotin
ENSG00000125810	CD93	CD93 molecule
ENSG00000115165	CYTIP	cytohesin 1 interacting protein
ENSG00000136040	PLXNC1	plexin C1
ENSG00000130775	C1orf38	chromosome 1 open reading frame 38
ENSG00000174175	SELP	selectin P (granule membrane protein 140kDa, antigen CD62)
ENSG00000077943	ITGA8	integrin, alpha 8
ENSG00000026751	SLAMF7	SLAM family member 7
ENSG00000010327	STAB1	stabilin 1
ENSG00000173432	SAA1	serum amyloid A1
ENSG00000101680	LAMA1	laminin, alpha 1
ENSG00000091129	NRCAM	neuronal cell adhesion molecule
ENSG00000145681	HAPLN1	hyaluronan and proteoglycan link protein 1
ENSG00000141968	VAV1	vav 1 guanine nucleotide exchange factor
ENSG00000122224	LY9	lymphocyte antigen 9
ENSG00000145113	MUC4	mucin 4, cell surface associated
ENSG00000012124	CD22	CD22 molecule
ENSG00000133800	LYVE1	lymphatic vessel endothelial hyaluronan receptor 1
ENSG00000107562	CXCL12	chemokine (C-X-C motif) ligand 12 (stromal cell-derived factor 1)
ENSG00000102879	CORO1A	coronin, actin binding protein, 1A
ENSG00000171914	TLN2	talin 2
ENSG00000197410	DCHS2	dachsous 2 (Drosophila)
ENSG00000005844	ITGAL	integrin, alpha L (antigen CD11A (p180), lymphocyte function-associated antigen 1; alpha polypeptide)
ENSG00000104415	WISP1	WNT1 inducible signaling pathway protein 1
ENSG00000076662	ICAM3	intercellular adhesion molecule 3
ENSG00000108622	ICAM2	intercellular adhesion molecule 2
ENSG00000091128	LAMB4	laminin, beta 4
ENSG00000057019	DCBLD2	discoidin, CUB and LCCL domain containing 2
ENSG00000081237	PTPRC	protein tyrosine phosphatase, receptor type, C
ENSG00000160255	ITGB2	integrin, beta 2 (complement component 3 receptor 3 and 4 subunit)
ENSG00000133110	POSTN	periostin, osteoblast specific factor
ENSG00000038427	VCAN	versican
ENSG00000169429	IL8	interleukin 8
ENSG00000204291	COL15A1	collagen, type XV, alpha 1
ENSG00000170558	CDH2	cadherin 2, type 1, N-cadherin (neuronal)
ENSG00000134765	DSC1	desmocollin 1
ENSG00000198910	L1CAM	L1 cell adhesion molecule
ENSG00000198759	EGFL6	EGF-like-domain, multiple 6
ENSG00000134873	CLDN10	claudin 10
humoral immune response----GO:0006959
C=85;O=13;E=1.40;R=9.27;rawP=1.24e-09;adjP=1.10e-07
ENSG00000081237	PTPRC	protein tyrosine phosphatase, receptor type, C
ENSG00000110777	POU2AF1	POU class 2 associating factor 1
ENSG00000125730	C3	complement component 3
ENSG00000104894	CD37	CD37 molecule
ENSG00000173372	C1QA	complement component 1, q subcomponent, A chain
ENSG00000000971	CFH	complement factor H
ENSG00000203710	CR1	complement component (3b/4b) receptor 1 (Knops blood group)
ENSG00000073849	ST6GAL1	ST6 beta-galactosamide alpha-2,6-sialyltranferase 1
ENSG00000205403	CFI	complement factor I
ENSG00000182326	C1S	complement component 1, s subcomponent
ENSG00000028277	POU2F2	POU class 2 homeobox 2
ENSG00000196092	PAX5	paired box 5
ENSG00000012223	LTF	lactotransferrin
taxis----GO:0042330
C=171;O=17;E=2.82;R=6.03;rawP=3.30e-09;adjP=2.50e-07
ENSG00000156234	CXCL13	chemokine (C-X-C motif) ligand 13
ENSG00000171051	FPR1	formyl peptide receptor 1
ENSG00000124875	CXCL6	chemokine (C-X-C motif) ligand 6 (granulocyte chemotactic protein 2)
ENSG00000173432	SAA1	serum amyloid A1
ENSG00000134516	DOCK2	dedicator of cytokinesis 2
ENSG00000160255	ITGB2	integrin, beta 2 (complement component 3 receptor 3 and 4 subunit)
ENSG00000163735	CXCL5	chemokine (C-X-C motif) ligand 5
ENSG00000128340	RAC2	ras-related C3 botulinum toxin substrate 2 (rho family, small GTP binding protein Rac2)
ENSG00000172349	IL16	interleukin 16 (lymphocyte chemoattractant factor)
ENSG00000121966	CXCR4	chemokine (C-X-C motif) receptor 4
ENSG00000169429	IL8	interleukin 8
ENSG00000137077	CCL21	chemokine (C-C motif) ligand 21
ENSG00000163739	CXCL1	chemokine (C-X-C motif) ligand 1 (melanoma growth stimulating activity, alpha)
ENSG00000102879	CORO1A	coronin, actin binding protein, 1A
ENSG00000107562	CXCL12	chemokine (C-X-C motif) ligand 12 (stromal cell-derived factor 1)
ENSG00000136960	ENPP2	ectonucleotide pyrophosphatase/phosphodiesterase 2
ENSG00000006074	CCL18	chemokine (C-C motif) ligand 18 (pulmonary and activation-regulated)
chemotaxis----GO:0006935
C=171;O=17;E=2.82;R=6.03;rawP=3.30e-09;adjP=2.50e-07
ENSG00000156234	CXCL13	chemokine (C-X-C motif) ligand 13
ENSG00000171051	FPR1	formyl peptide receptor 1
ENSG00000124875	CXCL6	chemokine (C-X-C motif) ligand 6 (granulocyte chemotactic protein 2)
ENSG00000173432	SAA1	serum amyloid A1
ENSG00000134516	DOCK2	dedicator of cytokinesis 2
ENSG00000160255	ITGB2	integrin, beta 2 (complement component 3 receptor 3 and 4 subunit)
ENSG00000163735	CXCL5	chemokine (C-X-C motif) ligand 5
ENSG00000128340	RAC2	ras-related C3 botulinum toxin substrate 2 (rho family, small GTP binding protein Rac2)
ENSG00000172349	IL16	interleukin 16 (lymphocyte chemoattractant factor)
ENSG00000121966	CXCR4	chemokine (C-X-C motif) receptor 4
ENSG00000169429	IL8	interleukin 8
ENSG00000137077	CCL21	chemokine (C-C motif) ligand 21
ENSG00000163739	CXCL1	chemokine (C-X-C motif) ligand 1 (melanoma growth stimulating activity, alpha)
ENSG00000102879	CORO1A	coronin, actin binding protein, 1A
ENSG00000107562	CXCL12	chemokine (C-X-C motif) ligand 12 (stromal cell-derived factor 1)
ENSG00000136960	ENPP2	ectonucleotide pyrophosphatase/phosphodiesterase 2
ENSG00000006074	CCL18	chemokine (C-C motif) ligand 18 (pulmonary and activation-regulated)
leukocyte activation----GO:0045321
C=324;O=23;E=5.34;R=4.30;rawP=4.13e-09;adjP=2.92e-07
ENSG00000160683	CXCR5	chemokine (C-X-C motif) receptor 5
ENSG00000125810	CD93	CD93 molecule
ENSG00000005844	ITGAL	integrin, alpha L (antigen CD11A (p180), lymphocyte function-associated antigen 1; alpha polypeptide)
ENSG00000147168	IL2RG	interleukin 2 receptor, gamma (severe combined immunodeficiency)
ENSG00000026751	SLAMF7	SLAM family member 7
ENSG00000004468	CD38	CD38 molecule
ENSG00000139193	CD27	CD27 molecule
ENSG00000168421	RHOH	ras homolog gene family, member H
ENSG00000134516	DOCK2	dedicator of cytokinesis 2
ENSG00000156738	MS4A1	membrane-spanning 4-domains, subfamily A, member 1
ENSG00000081237	PTPRC	protein tyrosine phosphatase, receptor type, C
ENSG00000141968	VAV1	vav 1 guanine nucleotide exchange factor
ENSG00000105369	CD79A	CD79a molecule, immunoglobulin-associated alpha
ENSG00000137265	IRF4	interferon regulatory factor 4
ENSG00000153064	BANK1	B-cell scaffold protein with ankyrin repeats 1
ENSG00000168685	IL7R	interleukin 7 receptor
ENSG00000100867	DHRS2	dehydrogenase/reductase (SDR family) member 2
ENSG00000169429	IL8	interleukin 8
ENSG00000197943	PLCG2	phospholipase C, gamma 2 (phosphatidylinositol-specific)
ENSG00000122188	LAX1	lymphocyte transmembrane adaptor 1
ENSG00000129988	LBP	lipopolysaccharide binding protein
ENSG00000134460	IL2RA	interleukin 2 receptor, alpha
ENSG00000102879	CORO1A	coronin, actin binding protein, 1A
activation of immune response----GO:0002253
C=100;O=13;E=1.65;R=7.88;rawP=9.60e-09;adjP=6.37e-07
ENSG00000081237	PTPRC	protein tyrosine phosphatase, receptor type, C
ENSG00000125730	C3	complement component 3
ENSG00000105369	CD79A	CD79a molecule, immunoglobulin-associated alpha
ENSG00000173372	C1QA	complement component 1, q subcomponent, A chain
ENSG00000000971	CFH	complement factor H
ENSG00000203710	CR1	complement component (3b/4b) receptor 1 (Knops blood group)
ENSG00000177455	CD19	CD19 molecule
ENSG00000205403	CFI	complement factor I
ENSG00000197943	PLCG2	phospholipase C, gamma 2 (phosphatidylinositol-specific)
ENSG00000090376	IRAK3	interleukin-1 receptor-associated kinase 3
ENSG00000122188	LAX1	lymphocyte transmembrane adaptor 1
ENSG00000182326	C1S	complement component 1, s subcomponent
ENSG00000129988	LBP	lipopolysaccharide binding protein
regulation of response to stimulus----GO:0048583
C=441;O=26;E=7.27;R=3.57;rawP=1.86e-08;adjP=1.16e-06
ENSG00000125730	C3	complement component 3
ENSG00000000971	CFH	complement factor H
ENSG00000174175	SELP	selectin P (granule membrane protein 140kDa, antigen CD62)
ENSG00000205403	CFI	complement factor I
ENSG00000090376	IRAK3	interleukin-1 receptor-associated kinase 3
ENSG00000173432	SAA1	serum amyloid A1
ENSG00000139193	CD27	CD27 molecule
ENSG00000081237	PTPRC	protein tyrosine phosphatase, receptor type, C
ENSG00000104894	CD37	CD37 molecule
ENSG00000172349	IL16	interleukin 16 (lymphocyte chemoattractant factor)
ENSG00000137265	IRF4	interferon regulatory factor 4
ENSG00000105369	CD79A	CD79a molecule, immunoglobulin-associated alpha
ENSG00000104814	MAP4K1	mitogen-activated protein kinase kinase kinase kinase 1
ENSG00000173372	C1QA	complement component 1, q subcomponent, A chain
ENSG00000168685	IL7R	interleukin 7 receptor
ENSG00000152208	GRID2	glutamate receptor, ionotropic, delta 2
ENSG00000177455	CD19	CD19 molecule
ENSG00000203710	CR1	complement component (3b/4b) receptor 1 (Knops blood group)
ENSG00000169429	IL8	interleukin 8
ENSG00000197943	PLCG2	phospholipase C, gamma 2 (phosphatidylinositol-specific)
ENSG00000122188	LAX1	lymphocyte transmembrane adaptor 1
ENSG00000182326	C1S	complement component 1, s subcomponent
ENSG00000107562	CXCL12	chemokine (C-X-C motif) ligand 12 (stromal cell-derived factor 1)
ENSG00000129988	LBP	lipopolysaccharide binding protein
ENSG00000134460	IL2RA	interleukin 2 receptor, alpha
ENSG00000170323	FABP4	fatty acid binding protein 4, adipocyte
regulation of immune system process----GO:0002682
C=362;O=23;E=5.97;R=3.85;rawP=3.32e-08;adjP=1.96e-06
ENSG00000125730	C3	complement component 3
ENSG00000000971	CFH	complement factor H
ENSG00000174175	SELP	selectin P (granule membrane protein 140kDa, antigen CD62)
ENSG00000205403	CFI	complement factor I
ENSG00000147168	IL2RG	interleukin 2 receptor, gamma (severe combined immunodeficiency)
ENSG00000090376	IRAK3	interleukin-1 receptor-associated kinase 3
ENSG00000004468	CD38	CD38 molecule
ENSG00000139193	CD27	CD27 molecule
ENSG00000081237	PTPRC	protein tyrosine phosphatase, receptor type, C
ENSG00000104894	CD37	CD37 molecule
ENSG00000137265	IRF4	interferon regulatory factor 4
ENSG00000105369	CD79A	CD79a molecule, immunoglobulin-associated alpha
ENSG00000173372	C1QA	complement component 1, q subcomponent, A chain
ENSG00000168685	IL7R	interleukin 7 receptor
ENSG00000177455	CD19	CD19 molecule
ENSG00000203710	CR1	complement component (3b/4b) receptor 1 (Knops blood group)
ENSG00000197943	PLCG2	phospholipase C, gamma 2 (phosphatidylinositol-specific)
ENSG00000122188	LAX1	lymphocyte transmembrane adaptor 1
ENSG00000182326	C1S	complement component 1, s subcomponent
ENSG00000107562	CXCL12	chemokine (C-X-C motif) ligand 12 (stromal cell-derived factor 1)
ENSG00000129988	LBP	lipopolysaccharide binding protein
ENSG00000134460	IL2RA	interleukin 2 receptor, alpha
ENSG00000102879	CORO1A	coronin, actin binding protein, 1A
response to stress----GO:0006950
C=1696;O=58;E=27.97;R=2.07;rawP=3.59e-08;adjP=2.01e-06
ENSG00000131042	LILRB2	leukocyte immunoglobulin-like receptor, subfamily B (with TM and ITIM domains), member 2
ENSG00000108405	P2RX1	purinergic receptor P2X, ligand-gated ion channel, 1
ENSG00000000971	CFH	complement factor H
ENSG00000174175	SELP	selectin P (granule membrane protein 140kDa, antigen CD62)
ENSG00000164938	TP53INP1	tumor protein p53 inducible nuclear protein 1
ENSG00000090376	IRAK3	interleukin-1 receptor-associated kinase 3
ENSG00000090382	LYZ	lysozyme (renal amyloidosis)
ENSG00000026751	SLAMF7	SLAM family member 7
ENSG00000010327	STAB1	stabilin 1
ENSG00000174123	TLR10	toll-like receptor 10
ENSG00000173432	SAA1	serum amyloid A1
ENSG00000139193	CD27	CD27 molecule
ENSG00000104368	PLAT	plasminogen activator, tissue
ENSG00000012223	LTF	lactotransferrin
ENSG00000175040	CHST2	carbohydrate (N-acetylglucosamine-6-O) sulfotransferase 2
ENSG00000134061	CD180	CD180 molecule
ENSG00000183691	NOG	noggin
ENSG00000119699	TGFB3	transforming growth factor, beta 3
ENSG00000133800	LYVE1	lymphatic vessel endothelial hyaluronan receptor 1
ENSG00000137077	CCL21	chemokine (C-C motif) ligand 21
ENSG00000102879	CORO1A	coronin, actin binding protein, 1A
ENSG00000177575	CD163	CD163 molecule
ENSG00000148677	ANKRD1	ankyrin repeat domain 1 (cardiac muscle)
ENSG00000165168	CYBB	cytochrome b-245, beta polypeptide
ENSG00000125730	C3	complement component 3
ENSG00000005844	ITGAL	integrin, alpha L (antigen CD11A (p180), lymphocyte function-associated antigen 1; alpha polypeptide)
ENSG00000099958	DERL3	Der1-like domain family, member 3
ENSG00000156234	CXCL13	chemokine (C-X-C motif) ligand 13
ENSG00000205403	CFI	complement factor I
ENSG00000124875	CXCL6	chemokine (C-X-C motif) ligand 6 (granulocyte chemotactic protein 2)
ENSG00000170866	LILRA3	leukocyte immunoglobulin-like receptor, subfamily A (without TM domain), member 3
ENSG00000170458	CD14	CD14 molecule
ENSG00000004468	CD38	CD38 molecule
ENSG00000101336	HCK	hemopoietic cell kinase
ENSG00000051108	HERPUD1	homocysteine-inducible, endoplasmic reticulum stress-inducible, ubiquitin-like domain member 1
ENSG00000057019	DCBLD2	discoidin, CUB and LCCL domain containing 2
ENSG00000081237	PTPRC	protein tyrosine phosphatase, receptor type, C
ENSG00000160255	ITGB2	integrin, beta 2 (complement component 3 receptor 3 and 4 subunit)
ENSG00000121966	CXCR4	chemokine (C-X-C motif) receptor 4
ENSG00000104814	MAP4K1	mitogen-activated protein kinase kinase kinase kinase 1
ENSG00000173372	C1QA	complement component 1, q subcomponent, A chain
ENSG00000051523	CYBA	cytochrome b-245, alpha polypeptide
ENSG00000117215	PLA2G2D	phospholipase A2, group IID
ENSG00000100867	DHRS2	dehydrogenase/reductase (SDR family) member 2
ENSG00000203710	CR1	complement component (3b/4b) receptor 1 (Knops blood group)
ENSG00000177455	CD19	CD19 molecule
ENSG00000115919	KYNU	kynureninase (L-kynurenine hydrolase)
ENSG00000038427	VCAN	versican
ENSG00000169429	IL8	interleukin 8
ENSG00000163739	CXCL1	chemokine (C-X-C motif) ligand 1 (melanoma growth stimulating activity, alpha)
ENSG00000176890	TYMS	thymidylate synthetase
ENSG00000198794	SCAMP5	secretory carrier membrane protein 5
ENSG00000182326	C1S	complement component 1, s subcomponent
ENSG00000159184	HOXB13	homeobox B13
ENSG00000134460	IL2RA	interleukin 2 receptor, alpha
ENSG00000129988	LBP	lipopolysaccharide binding protein
ENSG00000006074	CCL18	chemokine (C-C motif) ligand 18 (pulmonary and activation-regulated)
ENSG00000170323	FABP4	fatty acid binding protein 4, adipocyte
positive regulation of response to stimulus----GO:0048584
C=228;O=18;E=3.76;R=4.79;rawP=4.31e-08;adjP=2.29e-06
ENSG00000125730	C3	complement component 3
ENSG00000000971	CFH	complement factor H
ENSG00000205403	CFI	complement factor I
ENSG00000090376	IRAK3	interleukin-1 receptor-associated kinase 3
ENSG00000139193	CD27	CD27 molecule
ENSG00000081237	PTPRC	protein tyrosine phosphatase, receptor type, C
ENSG00000105369	CD79A	CD79a molecule, immunoglobulin-associated alpha
ENSG00000172349	IL16	interleukin 16 (lymphocyte chemoattractant factor)
ENSG00000173372	C1QA	complement component 1, q subcomponent, A chain
ENSG00000177455	CD19	CD19 molecule
ENSG00000203710	CR1	complement component (3b/4b) receptor 1 (Knops blood group)
ENSG00000169429	IL8	interleukin 8
ENSG00000197943	PLCG2	phospholipase C, gamma 2 (phosphatidylinositol-specific)
ENSG00000182326	C1S	complement component 1, s subcomponent
ENSG00000122188	LAX1	lymphocyte transmembrane adaptor 1
ENSG00000129988	LBP	lipopolysaccharide binding protein
ENSG00000107562	CXCL12	chemokine (C-X-C motif) ligand 12 (stromal cell-derived factor 1)
ENSG00000170323	FABP4	fatty acid binding protein 4, adipocyte
lymphocyte activation----GO:0046649
C=272;O=19;E=4.49;R=4.24;rawP=1.26e-07;adjP=6.37e-06
ENSG00000160683	CXCR5	chemokine (C-X-C motif) receptor 5
ENSG00000005844	ITGAL	integrin, alpha L (antigen CD11A (p180), lymphocyte function-associated antigen 1; alpha polypeptide)
ENSG00000147168	IL2RG	interleukin 2 receptor, gamma (severe combined immunodeficiency)
ENSG00000026751	SLAMF7	SLAM family member 7
ENSG00000004468	CD38	CD38 molecule
ENSG00000139193	CD27	CD27 molecule
ENSG00000168421	RHOH	ras homolog gene family, member H
ENSG00000134516	DOCK2	dedicator of cytokinesis 2
ENSG00000156738	MS4A1	membrane-spanning 4-domains, subfamily A, member 1
ENSG00000141968	VAV1	vav 1 guanine nucleotide exchange factor
ENSG00000081237	PTPRC	protein tyrosine phosphatase, receptor type, C
ENSG00000105369	CD79A	CD79a molecule, immunoglobulin-associated alpha
ENSG00000137265	IRF4	interferon regulatory factor 4
ENSG00000153064	BANK1	B-cell scaffold protein with ankyrin repeats 1
ENSG00000168685	IL7R	interleukin 7 receptor
ENSG00000197943	PLCG2	phospholipase C, gamma 2 (phosphatidylinositol-specific)
ENSG00000122188	LAX1	lymphocyte transmembrane adaptor 1
ENSG00000134460	IL2RA	interleukin 2 receptor, alpha
ENSG00000102879	CORO1A	coronin, actin binding protein, 1A
response to chemical stimulus----GO:0042221
C=1243;O=46;E=20.50;R=2.24;rawP=1.40e-07;adjP=6.76e-06
ENSG00000114854	TNNC1	troponin C type 1 (slow)
ENSG00000019186	CYP24A1	cytochrome P450, family 24, subfamily A, polypeptide 1
ENSG00000108405	P2RX1	purinergic receptor P2X, ligand-gated ion channel, 1
ENSG00000174175	SELP	selectin P (granule membrane protein 140kDa, antigen CD62)
ENSG00000090376	IRAK3	interleukin-1 receptor-associated kinase 3
ENSG00000117724	CENPF	centromere protein F, 350/400ka (mitosin)
ENSG00000173432	SAA1	serum amyloid A1
ENSG00000139193	CD27	CD27 molecule
ENSG00000104368	PLAT	plasminogen activator, tissue
ENSG00000134516	DOCK2	dedicator of cytokinesis 2
ENSG00000172349	IL16	interleukin 16 (lymphocyte chemoattractant factor)
ENSG00000128340	RAC2	ras-related C3 botulinum toxin substrate 2 (rho family, small GTP binding protein Rac2)
ENSG00000151012	SLC7A11	solute carrier family 7, (cationic amino acid transporter, y+ system) member 11
ENSG00000101210	EEF1A2	eukaryotic translation elongation factor 1 alpha 2
ENSG00000197943	PLCG2	phospholipase C, gamma 2 (phosphatidylinositol-specific)
ENSG00000119699	TGFB3	transforming growth factor, beta 3
ENSG00000137077	CCL21	chemokine (C-C motif) ligand 21
ENSG00000107562	CXCL12	chemokine (C-X-C motif) ligand 12 (stromal cell-derived factor 1)
ENSG00000102879	CORO1A	coronin, actin binding protein, 1A
ENSG00000171345	KRT19	keratin 19
ENSG00000136960	ENPP2	ectonucleotide pyrophosphatase/phosphodiesterase 2
ENSG00000099958	DERL3	Der1-like domain family, member 3
ENSG00000156234	CXCL13	chemokine (C-X-C motif) ligand 13
ENSG00000171051	FPR1	formyl peptide receptor 1
ENSG00000124875	CXCL6	chemokine (C-X-C motif) ligand 6 (granulocyte chemotactic protein 2)
ENSG00000170458	CD14	CD14 molecule
ENSG00000004468	CD38	CD38 molecule
ENSG00000051108	HERPUD1	homocysteine-inducible, endoplasmic reticulum stress-inducible, ubiquitin-like domain member 1
ENSG00000163735	CXCL5	chemokine (C-X-C motif) ligand 5
ENSG00000160255	ITGB2	integrin, beta 2 (complement component 3 receptor 3 and 4 subunit)
ENSG00000121966	CXCR4	chemokine (C-X-C motif) receptor 4
ENSG00000180353	HCLS1	hematopoietic cell-specific Lyn substrate 1
ENSG00000149968	MMP3	matrix metallopeptidase 3 (stromelysin 1, progelatinase)
ENSG00000100867	DHRS2	dehydrogenase/reductase (SDR family) member 2
ENSG00000115919	KYNU	kynureninase (L-kynurenine hydrolase)
ENSG00000169429	IL8	interleukin 8
ENSG00000054356	PTPRN	protein tyrosine phosphatase, receptor type, N
ENSG00000169962	TAS1R3	taste receptor, type 1, member 3
ENSG00000163739	CXCL1	chemokine (C-X-C motif) ligand 1 (melanoma growth stimulating activity, alpha)
ENSG00000176890	TYMS	thymidylate synthetase
ENSG00000182326	C1S	complement component 1, s subcomponent
ENSG00000125378	BMP4	bone morphogenetic protein 4
ENSG00000129988	LBP	lipopolysaccharide binding protein
ENSG00000006074	CCL18	chemokine (C-C motif) ligand 18 (pulmonary and activation-regulated)
ENSG00000170323	FABP4	fatty acid binding protein 4, adipocyte
ENSG00000158125	XDH	xanthine dehydrogenase
cellular developmental process----GO:0048869
C=1773;O=58;E=29.24;R=1.98;rawP=1.70e-07;adjP=7.85e-06
ENSG00000100985	MMP9	matrix metallopeptidase 9 (gelatinase B, 92kDa gelatinase, 92kDa type IV collagenase)
ENSG00000019186	CYP24A1	cytochrome P450, family 24, subfamily A, polypeptide 1
ENSG00000074047	GLI2	GLI family zinc finger 2
ENSG00000167861	C17orf28	chromosome 17 open reading frame 28
ENSG00000077943	ITGA8	integrin, alpha 8
ENSG00000182752	PAPPA	pregnancy-associated plasma protein A, pappalysin 1
ENSG00000117724	CENPF	centromere protein F, 350/400ka (mitosin)
ENSG00000080986	NDC80	NDC80 homolog, kinetochore complex component (S. cerevisiae)
ENSG00000170381	SEMA3E	sema domain, immunoglobulin domain (Ig), short basic domain, secreted, (semaphorin) 3E
ENSG00000139193	CD27	CD27 molecule
ENSG00000107807	TLX1	T-cell leukemia homeobox 1
ENSG00000101680	LAMA1	laminin, alpha 1
ENSG00000091129	NRCAM	neuronal cell adhesion molecule
ENSG00000134516	DOCK2	dedicator of cytokinesis 2
ENSG00000100625	SIX4	SIX homeobox 4
ENSG00000137265	IRF4	interferon regulatory factor 4
ENSG00000108342	CSF3	colony stimulating factor 3 (granulocyte)
ENSG00000105369	CD79A	CD79a molecule, immunoglobulin-associated alpha
ENSG00000123095	BHLHE41	basic helix-loop-helix family, member e41
ENSG00000197943	PLCG2	phospholipase C, gamma 2 (phosphatidylinositol-specific)
ENSG00000183691	NOG	noggin
ENSG00000119699	TGFB3	transforming growth factor, beta 3
ENSG00000102879	CORO1A	coronin, actin binding protein, 1A
ENSG00000171345	KRT19	keratin 19
ENSG00000196092	PAX5	paired box 5
ENSG00000140961	OSGIN1	oxidative stress induced growth inhibitor 1
ENSG00000185686	PRAME	preferentially expressed antigen in melanoma
ENSG00000145423	SFRP2	secreted frizzled-related protein 2
ENSG00000187323	DCC	deleted in colorectal carcinoma
ENSG00000010671	BTK	Bruton agammaglobulinemia tyrosine kinase
ENSG00000132185	FCRLA	Fc receptor-like A
ENSG00000147168	IL2RG	interleukin 2 receptor, gamma (severe combined immunodeficiency)
ENSG00000167077	MEI1	meiosis inhibitor 1
ENSG00000133169	BEX1	brain expressed, X-linked 1
ENSG00000168421	RHOH	ras homolog gene family, member H
ENSG00000112175	BMP5	bone morphogenetic protein 5
ENSG00000081237	PTPRC	protein tyrosine phosphatase, receptor type, C
ENSG00000160255	ITGB2	integrin, beta 2 (complement component 3 receptor 3 and 4 subunit)
ENSG00000180353	HCLS1	hematopoietic cell-specific Lyn substrate 1
ENSG00000111913	FAM65B	family with sequence similarity 65, member B
ENSG00000106483	SFRP4	secreted frizzled-related protein 4
ENSG00000168685	IL7R	interleukin 7 receptor
ENSG00000100867	DHRS2	dehydrogenase/reductase (SDR family) member 2
ENSG00000038427	VCAN	versican
ENSG00000204291	COL15A1	collagen, type XV, alpha 1
ENSG00000172867	KRT2	keratin 2
ENSG00000182326	C1S	complement component 1, s subcomponent
ENSG00000125378	BMP4	bone morphogenetic protein 4
ENSG00000159184	HOXB13	homeobox B13
ENSG00000134460	IL2RA	interleukin 2 receptor, alpha
ENSG00000170558	CDH2	cadherin 2, type 1, N-cadherin (neuronal)
ENSG00000198910	L1CAM	L1 cell adhesion molecule
ENSG00000198759	EGFL6	EGF-like-domain, multiple 6
ENSG00000106565	TMEM176B	transmembrane protein 176B
ENSG00000170323	FABP4	fatty acid binding protein 4, adipocyte
ENSG00000081189	MEF2C	myocyte enhancer factor 2C
ENSG00000179593	ALOX15B	arachidonate 15-lipoxygenase, type B
ENSG00000158125	XDH	xanthine dehydrogenase
locomotion----GO:0040011
C=529;O=27;E=8.72;R=3.09;rawP=1.89e-07;adjP=8.36e-06
ENSG00000100985	MMP9	matrix metallopeptidase 9 (gelatinase B, 92kDa gelatinase, 92kDa type IV collagenase)
ENSG00000156234	CXCL13	chemokine (C-X-C motif) ligand 13
ENSG00000174175	SELP	selectin P (granule membrane protein 140kDa, antigen CD62)
ENSG00000187323	DCC	deleted in colorectal carcinoma
ENSG00000171051	FPR1	formyl peptide receptor 1
ENSG00000124875	CXCL6	chemokine (C-X-C motif) ligand 6 (granulocyte chemotactic protein 2)
ENSG00000173432	SAA1	serum amyloid A1
ENSG00000101680	LAMA1	laminin, alpha 1
ENSG00000104368	PLAT	plasminogen activator, tissue
ENSG00000091129	NRCAM	neuronal cell adhesion molecule
ENSG00000134516	DOCK2	dedicator of cytokinesis 2
ENSG00000100625	SIX4	SIX homeobox 4
ENSG00000160255	ITGB2	integrin, beta 2 (complement component 3 receptor 3 and 4 subunit)
ENSG00000163735	CXCL5	chemokine (C-X-C motif) ligand 5
ENSG00000172349	IL16	interleukin 16 (lymphocyte chemoattractant factor)
ENSG00000128340	RAC2	ras-related C3 botulinum toxin substrate 2 (rho family, small GTP binding protein Rac2)
ENSG00000121966	CXCR4	chemokine (C-X-C motif) receptor 4
ENSG00000169429	IL8	interleukin 8
ENSG00000172867	KRT2	keratin 2
ENSG00000163739	CXCL1	chemokine (C-X-C motif) ligand 1 (melanoma growth stimulating activity, alpha)
ENSG00000137077	CCL21	chemokine (C-C motif) ligand 21
ENSG00000107562	CXCL12	chemokine (C-X-C motif) ligand 12 (stromal cell-derived factor 1)
ENSG00000102879	CORO1A	coronin, actin binding protein, 1A
ENSG00000136960	ENPP2	ectonucleotide pyrophosphatase/phosphodiesterase 2
ENSG00000170558	CDH2	cadherin 2, type 1, N-cadherin (neuronal)
ENSG00000006074	CCL18	chemokine (C-C motif) ligand 18 (pulmonary and activation-regulated)
ENSG00000179593	ALOX15B	arachidonate 15-lipoxygenase, type B
innate immune response----GO:0045087
C=176;O=15;E=2.90;R=5.17;rawP=2.21e-07;adjP=9.39e-06
ENSG00000134061	CD180	CD180 molecule
ENSG00000125730	C3	complement component 3
ENSG00000173372	C1QA	complement component 1, q subcomponent, A chain
ENSG00000000971	CFH	complement factor H
ENSG00000051523	CYBA	cytochrome b-245, alpha polypeptide
ENSG00000203710	CR1	complement component (3b/4b) receptor 1 (Knops blood group)
ENSG00000115919	KYNU	kynureninase (L-kynurenine hydrolase)
ENSG00000205403	CFI	complement factor I
ENSG00000090376	IRAK3	interleukin-1 receptor-associated kinase 3
ENSG00000026751	SLAMF7	SLAM family member 7
ENSG00000182326	C1S	complement component 1, s subcomponent
ENSG00000102879	CORO1A	coronin, actin binding protein, 1A
ENSG00000129988	LBP	lipopolysaccharide binding protein
ENSG00000174123	TLR10	toll-like receptor 10
ENSG00000165168	CYBB	cytochrome b-245, beta polypeptide
cell differentiation----GO:0030154
C=1671;O=55;E=27.56;R=2.00;rawP=3.22e-07;adjP=1.32e-05
ENSG00000100985	MMP9	matrix metallopeptidase 9 (gelatinase B, 92kDa gelatinase, 92kDa type IV collagenase)
ENSG00000019186	CYP24A1	cytochrome P450, family 24, subfamily A, polypeptide 1
ENSG00000074047	GLI2	GLI family zinc finger 2
ENSG00000167861	C17orf28	chromosome 17 open reading frame 28
ENSG00000077943	ITGA8	integrin, alpha 8
ENSG00000182752	PAPPA	pregnancy-associated plasma protein A, pappalysin 1
ENSG00000117724	CENPF	centromere protein F, 350/400ka (mitosin)
ENSG00000170381	SEMA3E	sema domain, immunoglobulin domain (Ig), short basic domain, secreted, (semaphorin) 3E
ENSG00000139193	CD27	CD27 molecule
ENSG00000107807	TLX1	T-cell leukemia homeobox 1
ENSG00000101680	LAMA1	laminin, alpha 1
ENSG00000091129	NRCAM	neuronal cell adhesion molecule
ENSG00000134516	DOCK2	dedicator of cytokinesis 2
ENSG00000100625	SIX4	SIX homeobox 4
ENSG00000137265	IRF4	interferon regulatory factor 4
ENSG00000108342	CSF3	colony stimulating factor 3 (granulocyte)
ENSG00000105369	CD79A	CD79a molecule, immunoglobulin-associated alpha
ENSG00000123095	BHLHE41	basic helix-loop-helix family, member e41
ENSG00000197943	PLCG2	phospholipase C, gamma 2 (phosphatidylinositol-specific)
ENSG00000183691	NOG	noggin
ENSG00000119699	TGFB3	transforming growth factor, beta 3
ENSG00000171345	KRT19	keratin 19
ENSG00000196092	PAX5	paired box 5
ENSG00000140961	OSGIN1	oxidative stress induced growth inhibitor 1
ENSG00000185686	PRAME	preferentially expressed antigen in melanoma
ENSG00000145423	SFRP2	secreted frizzled-related protein 2
ENSG00000187323	DCC	deleted in colorectal carcinoma
ENSG00000010671	BTK	Bruton agammaglobulinemia tyrosine kinase
ENSG00000132185	FCRLA	Fc receptor-like A
ENSG00000147168	IL2RG	interleukin 2 receptor, gamma (severe combined immunodeficiency)
ENSG00000167077	MEI1	meiosis inhibitor 1
ENSG00000133169	BEX1	brain expressed, X-linked 1
ENSG00000168421	RHOH	ras homolog gene family, member H
ENSG00000112175	BMP5	bone morphogenetic protein 5
ENSG00000081237	PTPRC	protein tyrosine phosphatase, receptor type, C
ENSG00000180353	HCLS1	hematopoietic cell-specific Lyn substrate 1
ENSG00000111913	FAM65B	family with sequence similarity 65, member B
ENSG00000106483	SFRP4	secreted frizzled-related protein 4
ENSG00000168685	IL7R	interleukin 7 receptor
ENSG00000100867	DHRS2	dehydrogenase/reductase (SDR family) member 2
ENSG00000038427	VCAN	versican
ENSG00000204291	COL15A1	collagen, type XV, alpha 1
ENSG00000172867	KRT2	keratin 2
ENSG00000182326	C1S	complement component 1, s subcomponent
ENSG00000125378	BMP4	bone morphogenetic protein 4
ENSG00000159184	HOXB13	homeobox B13
ENSG00000134460	IL2RA	interleukin 2 receptor, alpha
ENSG00000170558	CDH2	cadherin 2, type 1, N-cadherin (neuronal)
ENSG00000198910	L1CAM	L1 cell adhesion molecule
ENSG00000198759	EGFL6	EGF-like-domain, multiple 6
ENSG00000106565	TMEM176B	transmembrane protein 176B
ENSG00000170323	FABP4	fatty acid binding protein 4, adipocyte
ENSG00000081189	MEF2C	myocyte enhancer factor 2C
ENSG00000179593	ALOX15B	arachidonate 15-lipoxygenase, type B
ENSG00000158125	XDH	xanthine dehydrogenase
positive regulation of immune response----GO:0050778
C=142;O=13;E=2.34;R=5.55;rawP=6.38e-07;adjP=2.51e-05
ENSG00000081237	PTPRC	protein tyrosine phosphatase, receptor type, C
ENSG00000125730	C3	complement component 3
ENSG00000105369	CD79A	CD79a molecule, immunoglobulin-associated alpha
ENSG00000173372	C1QA	complement component 1, q subcomponent, A chain
ENSG00000000971	CFH	complement factor H
ENSG00000203710	CR1	complement component (3b/4b) receptor 1 (Knops blood group)
ENSG00000177455	CD19	CD19 molecule
ENSG00000205403	CFI	complement factor I
ENSG00000197943	PLCG2	phospholipase C, gamma 2 (phosphatidylinositol-specific)
ENSG00000090376	IRAK3	interleukin-1 receptor-associated kinase 3
ENSG00000122188	LAX1	lymphocyte transmembrane adaptor 1
ENSG00000182326	C1S	complement component 1, s subcomponent
ENSG00000129988	LBP	lipopolysaccharide binding protein
regulation of immune response----GO:0050776
C=218;O=16;E=3.60;R=4.45;rawP=6.66e-07;adjP=2.53e-05
ENSG00000081237	PTPRC	protein tyrosine phosphatase, receptor type, C
ENSG00000125730	C3	complement component 3
ENSG00000104894	CD37	CD37 molecule
ENSG00000137265	IRF4	interferon regulatory factor 4
ENSG00000105369	CD79A	CD79a molecule, immunoglobulin-associated alpha
ENSG00000173372	C1QA	complement component 1, q subcomponent, A chain
ENSG00000000971	CFH	complement factor H
ENSG00000168685	IL7R	interleukin 7 receptor
ENSG00000203710	CR1	complement component (3b/4b) receptor 1 (Knops blood group)
ENSG00000177455	CD19	CD19 molecule
ENSG00000205403	CFI	complement factor I
ENSG00000197943	PLCG2	phospholipase C, gamma 2 (phosphatidylinositol-specific)
ENSG00000090376	IRAK3	interleukin-1 receptor-associated kinase 3
ENSG00000122188	LAX1	lymphocyte transmembrane adaptor 1
ENSG00000182326	C1S	complement component 1, s subcomponent
ENSG00000129988	LBP	lipopolysaccharide binding protein
immune effector process----GO:0002252
C=200;O=15;E=3.30;R=4.55;rawP=1.14e-06;adjP=4.17e-05
ENSG00000081237	PTPRC	protein tyrosine phosphatase, receptor type, C
ENSG00000125730	C3	complement component 3
ENSG00000104894	CD37	CD37 molecule
ENSG00000122224	LY9	lymphocyte antigen 9
ENSG00000173372	C1QA	complement component 1, q subcomponent, A chain
ENSG00000000971	CFH	complement factor H
ENSG00000168685	IL7R	interleukin 7 receptor
ENSG00000203710	CR1	complement component (3b/4b) receptor 1 (Knops blood group)
ENSG00000205403	CFI	complement factor I
ENSG00000090376	IRAK3	interleukin-1 receptor-associated kinase 3
ENSG00000026751	SLAMF7	SLAM family member 7
ENSG00000122188	LAX1	lymphocyte transmembrane adaptor 1
ENSG00000182326	C1S	complement component 1, s subcomponent
ENSG00000129988	LBP	lipopolysaccharide binding protein
ENSG00000139193	CD27	CD27 molecule
hemopoietic or lymphoid organ development----GO:0048534
C=316;O=19;E=5.21;R=3.65;rawP=1.26e-06;adjP=4.46e-05
ENSG00000100985	MMP9	matrix metallopeptidase 9 (gelatinase B, 92kDa gelatinase, 92kDa type IV collagenase)
ENSG00000160683	CXCR5	chemokine (C-X-C motif) receptor 5
ENSG00000156234	CXCL13	chemokine (C-X-C motif) ligand 13
ENSG00000147168	IL2RG	interleukin 2 receptor, gamma (severe combined immunodeficiency)
ENSG00000107807	TLX1	T-cell leukemia homeobox 1
ENSG00000139193	CD27	CD27 molecule
ENSG00000168421	RHOH	ras homolog gene family, member H
ENSG00000134516	DOCK2	dedicator of cytokinesis 2
ENSG00000100625	SIX4	SIX homeobox 4
ENSG00000081237	PTPRC	protein tyrosine phosphatase, receptor type, C
ENSG00000105369	CD79A	CD79a molecule, immunoglobulin-associated alpha
ENSG00000108342	CSF3	colony stimulating factor 3 (granulocyte)
ENSG00000137265	IRF4	interferon regulatory factor 4
ENSG00000180353	HCLS1	hematopoietic cell-specific Lyn substrate 1
ENSG00000168685	IL7R	interleukin 7 receptor
ENSG00000100867	DHRS2	dehydrogenase/reductase (SDR family) member 2
ENSG00000197943	PLCG2	phospholipase C, gamma 2 (phosphatidylinositol-specific)
ENSG00000134460	IL2RA	interleukin 2 receptor, alpha
ENSG00000125378	BMP4	bone morphogenetic protein 4
B cell activation----GO:0042113
C=107;O=11;E=1.76;R=6.23;rawP=1.50e-06;adjP=5.14e-05
ENSG00000081237	PTPRC	protein tyrosine phosphatase, receptor type, C
ENSG00000160683	CXCR5	chemokine (C-X-C motif) receptor 5
ENSG00000105369	CD79A	CD79a molecule, immunoglobulin-associated alpha
ENSG00000153064	BANK1	B-cell scaffold protein with ankyrin repeats 1
ENSG00000168685	IL7R	interleukin 7 receptor
ENSG00000197943	PLCG2	phospholipase C, gamma 2 (phosphatidylinositol-specific)
ENSG00000147168	IL2RG	interleukin 2 receptor, gamma (severe combined immunodeficiency)
ENSG00000122188	LAX1	lymphocyte transmembrane adaptor 1
ENSG00000004468	CD38	CD38 molecule
ENSG00000139193	CD27	CD27 molecule
ENSG00000156738	MS4A1	membrane-spanning 4-domains, subfamily A, member 1
locomotory behavior----GO:0007626
C=273;O=17;E=4.50;R=3.78;rawP=2.90e-06;adjP=9.62e-05
ENSG00000156234	CXCL13	chemokine (C-X-C motif) ligand 13
ENSG00000171051	FPR1	formyl peptide receptor 1
ENSG00000124875	CXCL6	chemokine (C-X-C motif) ligand 6 (granulocyte chemotactic protein 2)
ENSG00000173432	SAA1	serum amyloid A1
ENSG00000134516	DOCK2	dedicator of cytokinesis 2
ENSG00000160255	ITGB2	integrin, beta 2 (complement component 3 receptor 3 and 4 subunit)
ENSG00000163735	CXCL5	chemokine (C-X-C motif) ligand 5
ENSG00000128340	RAC2	ras-related C3 botulinum toxin substrate 2 (rho family, small GTP binding protein Rac2)
ENSG00000172349	IL16	interleukin 16 (lymphocyte chemoattractant factor)
ENSG00000121966	CXCR4	chemokine (C-X-C motif) receptor 4
ENSG00000169429	IL8	interleukin 8
ENSG00000137077	CCL21	chemokine (C-C motif) ligand 21
ENSG00000163739	CXCL1	chemokine (C-X-C motif) ligand 1 (melanoma growth stimulating activity, alpha)
ENSG00000102879	CORO1A	coronin, actin binding protein, 1A
ENSG00000107562	CXCL12	chemokine (C-X-C motif) ligand 12 (stromal cell-derived factor 1)
ENSG00000136960	ENPP2	ectonucleotide pyrophosphatase/phosphodiesterase 2
ENSG00000006074	CCL18	chemokine (C-C motif) ligand 18 (pulmonary and activation-regulated)
immune system development----GO:0002520
C=337;O=19;E=5.56;R=3.42;rawP=3.25e-06;adjP=0.0001
ENSG00000100985	MMP9	matrix metallopeptidase 9 (gelatinase B, 92kDa gelatinase, 92kDa type IV collagenase)
ENSG00000160683	CXCR5	chemokine (C-X-C motif) receptor 5
ENSG00000156234	CXCL13	chemokine (C-X-C motif) ligand 13
ENSG00000147168	IL2RG	interleukin 2 receptor, gamma (severe combined immunodeficiency)
ENSG00000107807	TLX1	T-cell leukemia homeobox 1
ENSG00000139193	CD27	CD27 molecule
ENSG00000168421	RHOH	ras homolog gene family, member H
ENSG00000134516	DOCK2	dedicator of cytokinesis 2
ENSG00000100625	SIX4	SIX homeobox 4
ENSG00000081237	PTPRC	protein tyrosine phosphatase, receptor type, C
ENSG00000105369	CD79A	CD79a molecule, immunoglobulin-associated alpha
ENSG00000108342	CSF3	colony stimulating factor 3 (granulocyte)
ENSG00000137265	IRF4	interferon regulatory factor 4
ENSG00000180353	HCLS1	hematopoietic cell-specific Lyn substrate 1
ENSG00000168685	IL7R	interleukin 7 receptor
ENSG00000100867	DHRS2	dehydrogenase/reductase (SDR family) member 2
ENSG00000197943	PLCG2	phospholipase C, gamma 2 (phosphatidylinositol-specific)
ENSG00000134460	IL2RA	interleukin 2 receptor, alpha
ENSG00000125378	BMP4	bone morphogenetic protein 4
positive regulation of biological process----GO:0048518
C=1865;O=56;E=30.76;R=1.82;rawP=4.56e-06;adjP=0.0001
ENSG00000100985	MMP9	matrix metallopeptidase 9 (gelatinase B, 92kDa gelatinase, 92kDa type IV collagenase)
ENSG00000108405	P2RX1	purinergic receptor P2X, ligand-gated ion channel, 1
ENSG00000074047	GLI2	GLI family zinc finger 2
ENSG00000000971	CFH	complement factor H
ENSG00000174175	SELP	selectin P (granule membrane protein 140kDa, antigen CD62)
ENSG00000077943	ITGA8	integrin, alpha 8
ENSG00000164938	TP53INP1	tumor protein p53 inducible nuclear protein 1
ENSG00000090376	IRAK3	interleukin-1 receptor-associated kinase 3
ENSG00000026751	SLAMF7	SLAM family member 7
ENSG00000142224	IL19	interleukin 19
ENSG00000173432	SAA1	serum amyloid A1
ENSG00000139193	CD27	CD27 molecule
ENSG00000107807	TLX1	T-cell leukemia homeobox 1
ENSG00000101680	LAMA1	laminin, alpha 1
ENSG00000091129	NRCAM	neuronal cell adhesion molecule
ENSG00000100625	SIX4	SIX homeobox 4
ENSG00000141968	VAV1	vav 1 guanine nucleotide exchange factor
ENSG00000172349	IL16	interleukin 16 (lymphocyte chemoattractant factor)
ENSG00000137265	IRF4	interferon regulatory factor 4
ENSG00000108342	CSF3	colony stimulating factor 3 (granulocyte)
ENSG00000105369	CD79A	CD79a molecule, immunoglobulin-associated alpha
ENSG00000128340	RAC2	ras-related C3 botulinum toxin substrate 2 (rho family, small GTP binding protein Rac2)
ENSG00000197943	PLCG2	phospholipase C, gamma 2 (phosphatidylinositol-specific)
ENSG00000183691	NOG	noggin
ENSG00000119699	TGFB3	transforming growth factor, beta 3
ENSG00000122188	LAX1	lymphocyte transmembrane adaptor 1
ENSG00000107562	CXCL12	chemokine (C-X-C motif) ligand 12 (stromal cell-derived factor 1)
ENSG00000102879	CORO1A	coronin, actin binding protein, 1A
ENSG00000125730	C3	complement component 3
ENSG00000058335	RASGRF1	Ras protein-specific guanine nucleotide-releasing factor 1
ENSG00000185686	PRAME	preferentially expressed antigen in melanoma
ENSG00000187323	DCC	deleted in colorectal carcinoma
ENSG00000205403	CFI	complement factor I
ENSG00000010671	BTK	Bruton agammaglobulinemia tyrosine kinase
ENSG00000147168	IL2RG	interleukin 2 receptor, gamma (severe combined immunodeficiency)
ENSG00000170458	CD14	CD14 molecule
ENSG00000004468	CD38	CD38 molecule
ENSG00000081237	PTPRC	protein tyrosine phosphatase, receptor type, C
ENSG00000163735	CXCL5	chemokine (C-X-C motif) ligand 5
ENSG00000104894	CD37	CD37 molecule
ENSG00000180353	HCLS1	hematopoietic cell-specific Lyn substrate 1
ENSG00000173372	C1QA	complement component 1, q subcomponent, A chain
ENSG00000168685	IL7R	interleukin 7 receptor
ENSG00000177455	CD19	CD19 molecule
ENSG00000203710	CR1	complement component (3b/4b) receptor 1 (Knops blood group)
ENSG00000169429	IL8	interleukin 8
ENSG00000198794	SCAMP5	secretory carrier membrane protein 5
ENSG00000182326	C1S	complement component 1, s subcomponent
ENSG00000102096	PIM2	pim-2 oncogene
ENSG00000125378	BMP4	bone morphogenetic protein 4
ENSG00000129988	LBP	lipopolysaccharide binding protein
ENSG00000134460	IL2RA	interleukin 2 receptor, alpha
ENSG00000198910	L1CAM	L1 cell adhesion molecule
ENSG00000170323	FABP4	fatty acid binding protein 4, adipocyte
ENSG00000081189	MEF2C	myocyte enhancer factor 2C
ENSG00000179593	ALOX15B	arachidonate 15-lipoxygenase, type B
acute inflammatory response----GO:0002526
C=101;O=10;E=1.67;R=6.00;rawP=6.37e-06;adjP=0.0002
ENSG00000125730	C3	complement component 3
ENSG00000108405	P2RX1	purinergic receptor P2X, ligand-gated ion channel, 1
ENSG00000173372	C1QA	complement component 1, q subcomponent, A chain
ENSG00000000971	CFH	complement factor H
ENSG00000203710	CR1	complement component (3b/4b) receptor 1 (Knops blood group)
ENSG00000205403	CFI	complement factor I
ENSG00000182326	C1S	complement component 1, s subcomponent
ENSG00000129988	LBP	lipopolysaccharide binding protein
ENSG00000173432	SAA1	serum amyloid A1
ENSG00000177575	CD163	CD163 molecule
cell chemotaxis----GO:0060326
C=44;O=7;E=0.73;R=9.65;rawP=6.92e-06;adjP=0.0002
ENSG00000160255	ITGB2	integrin, beta 2 (complement component 3 receptor 3 and 4 subunit)
ENSG00000172349	IL16	interleukin 16 (lymphocyte chemoattractant factor)
ENSG00000107562	CXCL12	chemokine (C-X-C motif) ligand 12 (stromal cell-derived factor 1)
ENSG00000102879	CORO1A	coronin, actin binding protein, 1A
ENSG00000173432	SAA1	serum amyloid A1
ENSG00000134516	DOCK2	dedicator of cytokinesis 2
ENSG00000169429	IL8	interleukin 8
cell communication----GO:0007154
C=4150;O=100;E=68.44;R=1.46;rawP=7.06e-06;adjP=0.0002
ENSG00000117152	RGS4	regulator of G-protein signaling 4
ENSG00000160683	CXCR5	chemokine (C-X-C motif) receptor 5
ENSG00000019186	CYP24A1	cytochrome P450, family 24, subfamily A, polypeptide 1
ENSG00000131042	LILRB2	leukocyte immunoglobulin-like receptor, subfamily B (with TM and ITIM domains), member 2
ENSG00000108405	P2RX1	purinergic receptor P2X, ligand-gated ion channel, 1
ENSG00000074047	GLI2	GLI family zinc finger 2
ENSG00000182162	P2RY8	purinergic receptor P2Y, G-protein coupled, 8
ENSG00000136040	PLXNC1	plexin C1
ENSG00000163219	ARHGAP25	Rho GTPase activating protein 25
ENSG00000077943	ITGA8	integrin, alpha 8
ENSG00000145358	DDIT4L	DNA-damage-inducible transcript 4-like
ENSG00000080986	NDC80	NDC80 homolog, kinetochore complex component (S. cerevisiae)
ENSG00000142224	IL19	interleukin 19
ENSG00000010327	STAB1	stabilin 1
ENSG00000174123	TLR10	toll-like receptor 10
ENSG00000179826	MRGPRX3	MAS-related GPR, member X3
ENSG00000104368	PLAT	plasminogen activator, tissue
ENSG00000101445	PPP1R16B	protein phosphatase 1, regulatory (inhibitor) subunit 16B
ENSG00000186472	PCLO	piccolo (presynaptic cytomatrix protein)
ENSG00000143119	CD53	CD53 molecule
ENSG00000169435	RASSF6	Ras association (RalGDS/AF-6) domain family member 6
ENSG00000141968	VAV1	vav 1 guanine nucleotide exchange factor
ENSG00000197943	PLCG2	phospholipase C, gamma 2 (phosphatidylinositol-specific)
ENSG00000183691	NOG	noggin
ENSG00000148677	ANKRD1	ankyrin repeat domain 1 (cardiac muscle)
ENSG00000125730	C3	complement component 3
ENSG00000185686	PRAME	preferentially expressed antigen in melanoma
ENSG00000005844	ITGAL	integrin, alpha L (antigen CD11A (p180), lymphocyte function-associated antigen 1; alpha polypeptide)
ENSG00000099958	DERL3	Der1-like domain family, member 3
ENSG00000100365	NCF4	neutrophil cytosolic factor 4, 40kDa
ENSG00000023445	BIRC3	baculoviral IAP repeat-containing 3
ENSG00000145423	SFRP2	secreted frizzled-related protein 2
ENSG00000171051	FPR1	formyl peptide receptor 1
ENSG00000153292	GPR110	G protein-coupled receptor 110
ENSG00000010671	BTK	Bruton agammaglobulinemia tyrosine kinase
ENSG00000124875	CXCL6	chemokine (C-X-C motif) ligand 6 (granulocyte chemotactic protein 2)
ENSG00000170866	LILRA3	leukocyte immunoglobulin-like receptor, subfamily A (without TM domain), member 3
ENSG00000170458	CD14	CD14 molecule
ENSG00000166927	MS4A7	membrane-spanning 4-domains, subfamily A, member 7
ENSG00000156738	MS4A1	membrane-spanning 4-domains, subfamily A, member 1
ENSG00000082074	FYB	FYN binding protein (FYB-120/130)
ENSG00000057019	DCBLD2	discoidin, CUB and LCCL domain containing 2
ENSG00000160255	ITGB2	integrin, beta 2 (complement component 3 receptor 3 and 4 subunit)
ENSG00000163735	CXCL5	chemokine (C-X-C motif) ligand 5
ENSG00000168081	PNOC	prepronociceptin
ENSG00000173372	C1QA	complement component 1, q subcomponent, A chain
ENSG00000166501	PRKCB	protein kinase C, beta
ENSG00000177455	CD19	CD19 molecule
ENSG00000169429	IL8	interleukin 8
ENSG00000054356	PTPRN	protein tyrosine phosphatase, receptor type, N
ENSG00000169962	TAS1R3	taste receptor, type 1, member 3
ENSG00000163739	CXCL1	chemokine (C-X-C motif) ligand 1 (melanoma growth stimulating activity, alpha)
ENSG00000176890	TYMS	thymidylate synthetase
ENSG00000134460	IL2RA	interleukin 2 receptor, alpha
ENSG00000129988	LBP	lipopolysaccharide binding protein
ENSG00000100055	CYTH4	cytohesin 4
ENSG00000127507	EMR2	egf-like module containing, mucin-like, hormone receptor-like 2
ENSG00000164691	TAGAP	T-cell activation RhoGTPase activating protein
ENSG00000159618	GPR114	G protein-coupled receptor 114
ENSG00000132704	FCRL2	Fc receptor-like 2
ENSG00000090376	IRAK3	interleukin-1 receptor-associated kinase 3
ENSG00000072818	ACAP1	ArfGAP with coiled-coil, ankyrin repeat and PH domains 1
ENSG00000139193	CD27	CD27 molecule
ENSG00000101680	LAMA1	laminin, alpha 1
ENSG00000106688	SLC1A1	solute carrier family 1 (neuronal/epithelial high affinity glutamate transporter, system Xag), member 1
ENSG00000090104	RGS1	regulator of G-protein signaling 1
ENSG00000100368	CSF2RB	colony stimulating factor 2 receptor, beta, low-affinity (granulocyte-macrophage)
ENSG00000108342	CSF3	colony stimulating factor 3 (granulocyte)
ENSG00000128340	RAC2	ras-related C3 botulinum toxin substrate 2 (rho family, small GTP binding protein Rac2)
ENSG00000105369	CD79A	CD79a molecule, immunoglobulin-associated alpha
ENSG00000119699	TGFB3	transforming growth factor, beta 3
ENSG00000137077	CCL21	chemokine (C-C motif) ligand 21
ENSG00000122188	LAX1	lymphocyte transmembrane adaptor 1
ENSG00000107562	CXCL12	chemokine (C-X-C motif) ligand 12 (stromal cell-derived factor 1)
ENSG00000136960	ENPP2	ectonucleotide pyrophosphatase/phosphodiesterase 2
ENSG00000072694	FCGR2B	Fc fragment of IgG, low affinity IIb, receptor (CD32)
ENSG00000058335	RASGRF1	Ras protein-specific guanine nucleotide-releasing factor 1
ENSG00000156234	CXCL13	chemokine (C-X-C motif) ligand 13
ENSG00000147168	IL2RG	interleukin 2 receptor, gamma (severe combined immunodeficiency)
ENSG00000007312	CD79B	CD79b molecule, immunoglobulin-associated beta
ENSG00000104415	WISP1	WNT1 inducible signaling pathway protein 1
ENSG00000004468	CD38	CD38 molecule
ENSG00000168421	RHOH	ras homolog gene family, member H
ENSG00000051108	HERPUD1	homocysteine-inducible, endoplasmic reticulum stress-inducible, ubiquitin-like domain member 1
ENSG00000081237	PTPRC	protein tyrosine phosphatase, receptor type, C
ENSG00000121966	CXCR4	chemokine (C-X-C motif) receptor 4
ENSG00000104814	MAP4K1	mitogen-activated protein kinase kinase kinase kinase 1
ENSG00000180353	HCLS1	hematopoietic cell-specific Lyn substrate 1
ENSG00000106483	SFRP4	secreted frizzled-related protein 4
ENSG00000168685	IL7R	interleukin 7 receptor
ENSG00000123329	ARHGAP9	Rho GTPase activating protein 9
ENSG00000152208	GRID2	glutamate receptor, ionotropic, delta 2
ENSG00000102096	PIM2	pim-2 oncogene
ENSG00000125378	BMP4	bone morphogenetic protein 4
ENSG00000048462	TNFRSF17	tumor necrosis factor receptor superfamily, member 17
ENSG00000170558	CDH2	cadherin 2, type 1, N-cadherin (neuronal)
ENSG00000006074	CCL18	chemokine (C-C motif) ligand 18 (pulmonary and activation-regulated)
ENSG00000198910	L1CAM	L1 cell adhesion molecule
ENSG00000105851	PIK3CG	phosphoinositide-3-kinase, catalytic, gamma polypeptide
ENSG00000196549	MME	membrane metallo-endopeptidase
cellular component movement----GO:0006928
C=561;O=25;E=9.25;R=2.70;rawP=6.33e-06;adjP=0.0002
ENSG00000100985	MMP9	matrix metallopeptidase 9 (gelatinase B, 92kDa gelatinase, 92kDa type IV collagenase)
ENSG00000160683	CXCR5	chemokine (C-X-C motif) receptor 5
ENSG00000112303	VNN2	vanin 2
ENSG00000005844	ITGAL	integrin, alpha L (antigen CD11A (p180), lymphocyte function-associated antigen 1; alpha polypeptide)
ENSG00000074047	GLI2	GLI family zinc finger 2
ENSG00000174175	SELP	selectin P (granule membrane protein 140kDa, antigen CD62)
ENSG00000187323	DCC	deleted in colorectal carcinoma
ENSG00000171051	FPR1	formyl peptide receptor 1
ENSG00000173432	SAA1	serum amyloid A1
ENSG00000101680	LAMA1	laminin, alpha 1
ENSG00000104368	PLAT	plasminogen activator, tissue
ENSG00000091129	NRCAM	neuronal cell adhesion molecule
ENSG00000134516	DOCK2	dedicator of cytokinesis 2
ENSG00000100625	SIX4	SIX homeobox 4
ENSG00000160255	ITGB2	integrin, beta 2 (complement component 3 receptor 3 and 4 subunit)
ENSG00000172349	IL16	interleukin 16 (lymphocyte chemoattractant factor)
ENSG00000169429	IL8	interleukin 8
ENSG00000172867	KRT2	keratin 2
ENSG00000133800	LYVE1	lymphatic vessel endothelial hyaluronan receptor 1
ENSG00000107562	CXCL12	chemokine (C-X-C motif) ligand 12 (stromal cell-derived factor 1)
ENSG00000102879	CORO1A	coronin, actin binding protein, 1A
ENSG00000136960	ENPP2	ectonucleotide pyrophosphatase/phosphodiesterase 2
ENSG00000170558	CDH2	cadherin 2, type 1, N-cadherin (neuronal)
ENSG00000198910	L1CAM	L1 cell adhesion molecule
ENSG00000179593	ALOX15B	arachidonate 15-lipoxygenase, type B
leukocyte chemotaxis----GO:0030595
C=43;O=7;E=0.71;R=9.87;rawP=5.90e-06;adjP=0.0002
ENSG00000160255	ITGB2	integrin, beta 2 (complement component 3 receptor 3 and 4 subunit)
ENSG00000172349	IL16	interleukin 16 (lymphocyte chemoattractant factor)
ENSG00000107562	CXCL12	chemokine (C-X-C motif) ligand 12 (stromal cell-derived factor 1)
ENSG00000102879	CORO1A	coronin, actin binding protein, 1A
ENSG00000173432	SAA1	serum amyloid A1
ENSG00000134516	DOCK2	dedicator of cytokinesis 2
ENSG00000169429	IL8	interleukin 8
leukocyte differentiation----GO:0002521
C=181;O=13;E=2.99;R=4.35;rawP=9.61e-06;adjP=0.0003
ENSG00000081237	PTPRC	protein tyrosine phosphatase, receptor type, C
ENSG00000100985	MMP9	matrix metallopeptidase 9 (gelatinase B, 92kDa gelatinase, 92kDa type IV collagenase)
ENSG00000137265	IRF4	interferon regulatory factor 4
ENSG00000108342	CSF3	colony stimulating factor 3 (granulocyte)
ENSG00000105369	CD79A	CD79a molecule, immunoglobulin-associated alpha
ENSG00000168685	IL7R	interleukin 7 receptor
ENSG00000100867	DHRS2	dehydrogenase/reductase (SDR family) member 2
ENSG00000197943	PLCG2	phospholipase C, gamma 2 (phosphatidylinositol-specific)
ENSG00000147168	IL2RG	interleukin 2 receptor, gamma (severe combined immunodeficiency)
ENSG00000134460	IL2RA	interleukin 2 receptor, alpha
ENSG00000139193	CD27	CD27 molecule
ENSG00000168421	RHOH	ras homolog gene family, member H
ENSG00000134516	DOCK2	dedicator of cytokinesis 2

## Sheet: Molecular function
Gene Ontology enrichment analysis (Molecular function) of differentially expressed genes.
receptor activity----GO:0004872
C=1674;O=56;E=27.24;R=2.06;rawP=1.02e-07;adjP=2.29e-05
Ensembl Gene stable ID	Gene symbol	Description
ENSG00000160683	CXCR5	chemokine (C-X-C motif) receptor 5
ENSG00000127507	EMR2	egf-like module containing, mucin-like, hormone receptor-like 2
ENSG00000125810	CD93	CD93 molecule
ENSG00000131042	LILRB2	leukocyte immunoglobulin-like receptor, subfamily B (with TM and ITIM domains), member 2
ENSG00000108405	P2RX1	purinergic receptor P2X, ligand-gated ion channel, 1
ENSG00000159618	GPR114	G protein-coupled receptor 114
ENSG00000182162	P2RY8	purinergic receptor P2Y, G-protein coupled, 8
ENSG00000136040	PLXNC1	plexin C1
ENSG00000132704	FCRL2	Fc receptor-like 2
ENSG00000077943	ITGA8	integrin, alpha 8
ENSG00000165457	FOLR2	folate receptor 2 (fetal)
ENSG00000026751	SLAMF7	SLAM family member 7
ENSG00000010327	STAB1	stabilin 1
ENSG00000170381	SEMA3E	sema domain, immunoglobulin domain (Ig), short basic domain, secreted, (semaphorin) 3E
ENSG00000174123	TLR10	toll-like receptor 10
ENSG00000139193	CD27	CD27 molecule
ENSG00000179826	MRGPRX3	MAS-related GPR, member X3
ENSG00000137648	TMPRSS4	transmembrane protease, serine 4
ENSG00000163534	FCRL1	Fc receptor-like 1
ENSG00000100368	CSF2RB	colony stimulating factor 2 receptor, beta, low-affinity (granulocyte-macrophage)
ENSG00000134061	CD180	CD180 molecule
ENSG00000105369	CD79A	CD79a molecule, immunoglobulin-associated alpha
ENSG00000143297	FCRL5	Fc receptor-like 5
ENSG00000133800	LYVE1	lymphatic vessel endothelial hyaluronan receptor 1
ENSG00000138131	LOXL4	lysyl oxidase-like 4
ENSG00000177575	CD163	CD163 molecule
ENSG00000136960	ENPP2	ectonucleotide pyrophosphatase/phosphodiesterase 2
ENSG00000072694	FCGR2B	Fc fragment of IgG, low affinity IIb, receptor (CD32)
ENSG00000005844	ITGAL	integrin, alpha L (antigen CD11A (p180), lymphocyte function-associated antigen 1; alpha polypeptide)
ENSG00000160856	FCRL3	Fc receptor-like 3
ENSG00000187323	DCC	deleted in colorectal carcinoma
ENSG00000205403	CFI	complement factor I
ENSG00000171051	FPR1	formyl peptide receptor 1
ENSG00000153292	GPR110	G protein-coupled receptor 110
ENSG00000147168	IL2RG	interleukin 2 receptor, gamma (severe combined immunodeficiency)
ENSG00000007312	CD79B	CD79b molecule, immunoglobulin-associated beta
ENSG00000170866	LILRA3	leukocyte immunoglobulin-like receptor, subfamily A (without TM domain), member 3
ENSG00000170458	CD14	CD14 molecule
ENSG00000004468	CD38	CD38 molecule
ENSG00000166927	MS4A7	membrane-spanning 4-domains, subfamily A, member 7
ENSG00000162747	FCGR3B	Fc fragment of IgG, low affinity IIIb, receptor (CD16b)
ENSG00000110324	IL10RA	interleukin 10 receptor, alpha
ENSG00000156738	MS4A1	membrane-spanning 4-domains, subfamily A, member 1
ENSG00000081237	PTPRC	protein tyrosine phosphatase, receptor type, C
ENSG00000160255	ITGB2	integrin, beta 2 (complement component 3 receptor 3 and 4 subunit)
ENSG00000121966	CXCR4	chemokine (C-X-C motif) receptor 4
ENSG00000168685	IL7R	interleukin 7 receptor
ENSG00000152208	GRID2	glutamate receptor, ionotropic, delta 2
ENSG00000203710	CR1	complement component (3b/4b) receptor 1 (Knops blood group)
ENSG00000054356	PTPRN	protein tyrosine phosphatase, receptor type, N
ENSG00000169962	TAS1R3	taste receptor, type 1, member 3
ENSG00000143226	FCGR2A	Fc fragment of IgG, low affinity IIa, receptor (CD32)
ENSG00000162739	SLAMF6	SLAM family member 6
ENSG00000134460	IL2RA	interleukin 2 receptor, alpha
ENSG00000048462	TNFRSF17	tumor necrosis factor receptor superfamily, member 17
ENSG00000167613	LAIR1	leukocyte-associated immunoglobulin-like receptor 1
molecular transducer activity----GO:0060089
C=2116;O=64;E=34.43;R=1.86;rawP=4.00e-07;adjP=3.00e-05
ENSG00000160683	CXCR5	chemokine (C-X-C motif) receptor 5
ENSG00000117152	RGS4	regulator of G-protein signaling 4
ENSG00000127507	EMR2	egf-like module containing, mucin-like, hormone receptor-like 2
ENSG00000125810	CD93	CD93 molecule
ENSG00000131042	LILRB2	leukocyte immunoglobulin-like receptor, subfamily B (with TM and ITIM domains), member 2
ENSG00000108405	P2RX1	purinergic receptor P2X, ligand-gated ion channel, 1
ENSG00000159618	GPR114	G protein-coupled receptor 114
ENSG00000182162	P2RY8	purinergic receptor P2Y, G-protein coupled, 8
ENSG00000136040	PLXNC1	plexin C1
ENSG00000132704	FCRL2	Fc receptor-like 2
ENSG00000077943	ITGA8	integrin, alpha 8
ENSG00000165457	FOLR2	folate receptor 2 (fetal)
ENSG00000026751	SLAMF7	SLAM family member 7
ENSG00000010327	STAB1	stabilin 1
ENSG00000170381	SEMA3E	sema domain, immunoglobulin domain (Ig), short basic domain, secreted, (semaphorin) 3E
ENSG00000155926	SLA	Src-like-adaptor
ENSG00000174123	TLR10	toll-like receptor 10
ENSG00000139193	CD27	CD27 molecule
ENSG00000179826	MRGPRX3	MAS-related GPR, member X3
ENSG00000137648	TMPRSS4	transmembrane protease, serine 4
ENSG00000090104	RGS1	regulator of G-protein signaling 1
ENSG00000163534	FCRL1	Fc receptor-like 1
ENSG00000100368	CSF2RB	colony stimulating factor 2 receptor, beta, low-affinity (granulocyte-macrophage)
ENSG00000134061	CD180	CD180 molecule
ENSG00000105369	CD79A	CD79a molecule, immunoglobulin-associated alpha
ENSG00000197943	PLCG2	phospholipase C, gamma 2 (phosphatidylinositol-specific)
ENSG00000143297	FCRL5	Fc receptor-like 5
ENSG00000133800	LYVE1	lymphatic vessel endothelial hyaluronan receptor 1
ENSG00000107562	CXCL12	chemokine (C-X-C motif) ligand 12 (stromal cell-derived factor 1)
ENSG00000138131	LOXL4	lysyl oxidase-like 4
ENSG00000177575	CD163	CD163 molecule
ENSG00000136960	ENPP2	ectonucleotide pyrophosphatase/phosphodiesterase 2
ENSG00000072694	FCGR2B	Fc fragment of IgG, low affinity IIb, receptor (CD32)
ENSG00000005844	ITGAL	integrin, alpha L (antigen CD11A (p180), lymphocyte function-associated antigen 1; alpha polypeptide)
ENSG00000160856	FCRL3	Fc receptor-like 3
ENSG00000187323	DCC	deleted in colorectal carcinoma
ENSG00000205403	CFI	complement factor I
ENSG00000171051	FPR1	formyl peptide receptor 1
ENSG00000153292	GPR110	G protein-coupled receptor 110
ENSG00000147168	IL2RG	interleukin 2 receptor, gamma (severe combined immunodeficiency)
ENSG00000007312	CD79B	CD79b molecule, immunoglobulin-associated beta
ENSG00000170866	LILRA3	leukocyte immunoglobulin-like receptor, subfamily A (without TM domain), member 3
ENSG00000170458	CD14	CD14 molecule
ENSG00000004468	CD38	CD38 molecule
ENSG00000166927	MS4A7	membrane-spanning 4-domains, subfamily A, member 7
ENSG00000162747	FCGR3B	Fc fragment of IgG, low affinity IIIb, receptor (CD16b)
ENSG00000110324	IL10RA	interleukin 10 receptor, alpha
ENSG00000156738	MS4A1	membrane-spanning 4-domains, subfamily A, member 1
ENSG00000081237	PTPRC	protein tyrosine phosphatase, receptor type, C
ENSG00000160255	ITGB2	integrin, beta 2 (complement component 3 receptor 3 and 4 subunit)
ENSG00000121966	CXCR4	chemokine (C-X-C motif) receptor 4
ENSG00000104814	MAP4K1	mitogen-activated protein kinase kinase kinase kinase 1
ENSG00000168685	IL7R	interleukin 7 receptor
ENSG00000152208	GRID2	glutamate receptor, ionotropic, delta 2
ENSG00000177455	CD19	CD19 molecule
ENSG00000203710	CR1	complement component (3b/4b) receptor 1 (Knops blood group)
ENSG00000054356	PTPRN	protein tyrosine phosphatase, receptor type, N
ENSG00000169962	TAS1R3	taste receptor, type 1, member 3
ENSG00000143226	FCGR2A	Fc fragment of IgG, low affinity IIa, receptor (CD32)
ENSG00000162739	SLAMF6	SLAM family member 6
ENSG00000125378	BMP4	bone morphogenetic protein 4
ENSG00000134460	IL2RA	interleukin 2 receptor, alpha
ENSG00000048462	TNFRSF17	tumor necrosis factor receptor superfamily, member 17
ENSG00000167613	LAIR1	leukocyte-associated immunoglobulin-like receptor 1
signal transducer activity----GO:0004871
C=2116;O=64;E=34.43;R=1.86;rawP=4.00e-07;adjP=3.00e-05
ENSG00000160683	CXCR5	chemokine (C-X-C motif) receptor 5
ENSG00000117152	RGS4	regulator of G-protein signaling 4
ENSG00000127507	EMR2	egf-like module containing, mucin-like, hormone receptor-like 2
ENSG00000125810	CD93	CD93 molecule
ENSG00000131042	LILRB2	leukocyte immunoglobulin-like receptor, subfamily B (with TM and ITIM domains), member 2
ENSG00000108405	P2RX1	purinergic receptor P2X, ligand-gated ion channel, 1
ENSG00000159618	GPR114	G protein-coupled receptor 114
ENSG00000182162	P2RY8	purinergic receptor P2Y, G-protein coupled, 8
ENSG00000136040	PLXNC1	plexin C1
ENSG00000132704	FCRL2	Fc receptor-like 2
ENSG00000077943	ITGA8	integrin, alpha 8
ENSG00000165457	FOLR2	folate receptor 2 (fetal)
ENSG00000026751	SLAMF7	SLAM family member 7
ENSG00000010327	STAB1	stabilin 1
ENSG00000170381	SEMA3E	sema domain, immunoglobulin domain (Ig), short basic domain, secreted, (semaphorin) 3E
ENSG00000155926	SLA	Src-like-adaptor
ENSG00000174123	TLR10	toll-like receptor 10
ENSG00000139193	CD27	CD27 molecule
ENSG00000179826	MRGPRX3	MAS-related GPR, member X3
ENSG00000137648	TMPRSS4	transmembrane protease, serine 4
ENSG00000090104	RGS1	regulator of G-protein signaling 1
ENSG00000163534	FCRL1	Fc receptor-like 1
ENSG00000100368	CSF2RB	colony stimulating factor 2 receptor, beta, low-affinity (granulocyte-macrophage)
ENSG00000134061	CD180	CD180 molecule
ENSG00000105369	CD79A	CD79a molecule, immunoglobulin-associated alpha
ENSG00000197943	PLCG2	phospholipase C, gamma 2 (phosphatidylinositol-specific)
ENSG00000143297	FCRL5	Fc receptor-like 5
ENSG00000133800	LYVE1	lymphatic vessel endothelial hyaluronan receptor 1
ENSG00000107562	CXCL12	chemokine (C-X-C motif) ligand 12 (stromal cell-derived factor 1)
ENSG00000138131	LOXL4	lysyl oxidase-like 4
ENSG00000177575	CD163	CD163 molecule
ENSG00000136960	ENPP2	ectonucleotide pyrophosphatase/phosphodiesterase 2
ENSG00000072694	FCGR2B	Fc fragment of IgG, low affinity IIb, receptor (CD32)
ENSG00000005844	ITGAL	integrin, alpha L (antigen CD11A (p180), lymphocyte function-associated antigen 1; alpha polypeptide)
ENSG00000160856	FCRL3	Fc receptor-like 3
ENSG00000187323	DCC	deleted in colorectal carcinoma
ENSG00000205403	CFI	complement factor I
ENSG00000171051	FPR1	formyl peptide receptor 1
ENSG00000153292	GPR110	G protein-coupled receptor 110
ENSG00000147168	IL2RG	interleukin 2 receptor, gamma (severe combined immunodeficiency)
ENSG00000007312	CD79B	CD79b molecule, immunoglobulin-associated beta
ENSG00000170866	LILRA3	leukocyte immunoglobulin-like receptor, subfamily A (without TM domain), member 3
ENSG00000170458	CD14	CD14 molecule
ENSG00000004468	CD38	CD38 molecule
ENSG00000166927	MS4A7	membrane-spanning 4-domains, subfamily A, member 7
ENSG00000162747	FCGR3B	Fc fragment of IgG, low affinity IIIb, receptor (CD16b)
ENSG00000110324	IL10RA	interleukin 10 receptor, alpha
ENSG00000156738	MS4A1	membrane-spanning 4-domains, subfamily A, member 1
ENSG00000081237	PTPRC	protein tyrosine phosphatase, receptor type, C
ENSG00000160255	ITGB2	integrin, beta 2 (complement component 3 receptor 3 and 4 subunit)
ENSG00000121966	CXCR4	chemokine (C-X-C motif) receptor 4
ENSG00000104814	MAP4K1	mitogen-activated protein kinase kinase kinase kinase 1
ENSG00000168685	IL7R	interleukin 7 receptor
ENSG00000152208	GRID2	glutamate receptor, ionotropic, delta 2
ENSG00000177455	CD19	CD19 molecule
ENSG00000203710	CR1	complement component (3b/4b) receptor 1 (Knops blood group)
ENSG00000054356	PTPRN	protein tyrosine phosphatase, receptor type, N
ENSG00000169962	TAS1R3	taste receptor, type 1, member 3
ENSG00000143226	FCGR2A	Fc fragment of IgG, low affinity IIa, receptor (CD32)
ENSG00000162739	SLAMF6	SLAM family member 6
ENSG00000125378	BMP4	bone morphogenetic protein 4
ENSG00000134460	IL2RA	interleukin 2 receptor, alpha
ENSG00000048462	TNFRSF17	tumor necrosis factor receptor superfamily, member 17
ENSG00000167613	LAIR1	leukocyte-associated immunoglobulin-like receptor 1
protein binding----GO:0005515
C=8041;O=168;E=130.84;R=1.28;rawP=1.10e-06;adjP=4.16e-05
ENSG00000093072	CECR1	cat eye syndrome chromosome region, candidate 1
ENSG00000108405	P2RX1	purinergic receptor P2X, ligand-gated ion channel, 1
ENSG00000074047	GLI2	GLI family zinc finger 2
ENSG00000136040	PLXNC1	plexin C1
ENSG00000077943	ITGA8	integrin, alpha 8
ENSG00000080986	NDC80	NDC80 homolog, kinetochore complex component (S. cerevisiae)
ENSG00000184489	PTP4A3	protein tyrosine phosphatase type IVA, member 3
ENSG00000010327	STAB1	stabilin 1
ENSG00000101445	PPP1R16B	protein phosphatase 1, regulatory (inhibitor) subunit 16B
ENSG00000012223	LTF	lactotransferrin
ENSG00000136286	MYO1G	myosin IG
ENSG00000145113	MUC4	mucin 4, cell surface associated
ENSG00000105048	TNNT1	troponin T type 1 (skeletal, slow)
ENSG00000183691	NOG	noggin
ENSG00000099399	MAGEB2	melanoma antigen family B, 2
ENSG00000171345	KRT19	keratin 19
ENSG00000197172	MAGEA6	melanoma antigen family A, 6
ENSG00000171914	TLN2	talin 2
ENSG00000128591	FLNC	filamin C, gamma
ENSG00000125730	C3	complement component 3
ENSG00000005844	ITGAL	integrin, alpha L (antigen CD11A (p180), lymphocyte function-associated antigen 1; alpha polypeptide)
ENSG00000099958	DERL3	Der1-like domain family, member 3
ENSG00000100365	NCF4	neutrophil cytosolic factor 4, 40kDa
ENSG00000187323	DCC	deleted in colorectal carcinoma
ENSG00000168078	PBK	PDZ binding kinase
ENSG00000139329	LUM	lumican
ENSG00000010671	BTK	Bruton agammaglobulinemia tyrosine kinase
ENSG00000124875	CXCL6	chemokine (C-X-C motif) ligand 6 (granulocyte chemotactic protein 2)
ENSG00000145088	EAF2	ELL associated factor 2
ENSG00000101336	HCK	hemopoietic cell kinase
ENSG00000082074	FYB	FYN binding protein (FYB-120/130)
ENSG00000168081	PNOC	prepronociceptin
ENSG00000160255	ITGB2	integrin, beta 2 (complement component 3 receptor 3 and 4 subunit)
ENSG00000163735	CXCL5	chemokine (C-X-C motif) ligand 5
ENSG00000051523	CYBA	cytochrome b-245, alpha polypeptide
ENSG00000188536	HBA2	hemoglobin, alpha 2
ENSG00000177455	CD19	CD19 molecule
ENSG00000115919	KYNU	kynureninase (L-kynurenine hydrolase)
ENSG00000169429	IL8	interleukin 8
ENSG00000204291	COL15A1	collagen, type XV, alpha 1
ENSG00000169962	TAS1R3	taste receptor, type 1, member 3
ENSG00000143851	PTPN7	protein tyrosine phosphatase, non-receptor type 7
ENSG00000172346	CSDC2	cold shock domain containing C2, RNA binding
ENSG00000129988	LBP	lipopolysaccharide binding protein
ENSG00000134460	IL2RA	interleukin 2 receptor, alpha
ENSG00000167613	LAIR1	leukocyte-associated immunoglobulin-like receptor 1
ENSG00000106415	GLCCI1	glucocorticoid induced transcript 1
ENSG00000170323	FABP4	fatty acid binding protein 4, adipocyte
ENSG00000081189	MEF2C	myocyte enhancer factor 2C
ENSG00000114854	TNNC1	troponin C type 1 (slow)
ENSG00000125810	CD93	CD93 molecule
ENSG00000147381	MAGEA4	melanoma antigen family A, 4
ENSG00000174175	SELP	selectin P (granule membrane protein 140kDa, antigen CD62)
ENSG00000132704	FCRL2	Fc receptor-like 2
ENSG00000167861	C17orf28	chromosome 17 open reading frame 28
ENSG00000074370	ATP2A3	ATPase, Ca++ transporting, ubiquitous
ENSG00000117724	CENPF	centromere protein F, 350/400ka (mitosin)
ENSG00000090376	IRAK3	interleukin-1 receptor-associated kinase 3
ENSG00000072818	ACAP1	ArfGAP with coiled-coil, ankyrin repeat and PH domains 1
ENSG00000137807	KIF23	kinesin family member 23
ENSG00000155926	SLA	Src-like-adaptor
ENSG00000107807	TLX1	T-cell leukemia homeobox 1
ENSG00000139193	CD27	CD27 molecule
ENSG00000205426	KRT81	keratin 81
ENSG00000106688	SLC1A1	solute carrier family 1 (neuronal/epithelial high affinity glutamate transporter, system Xag), member 1
ENSG00000134061	CD180	CD180 molecule
ENSG00000105369	CD79A	CD79a molecule, immunoglobulin-associated alpha
ENSG00000128340	RAC2	ras-related C3 botulinum toxin substrate 2 (rho family, small GTP binding protein Rac2)
ENSG00000012124	CD22	CD22 molecule
ENSG00000119699	TGFB3	transforming growth factor, beta 3
ENSG00000110934	BIN2	bridging integrator 2
ENSG00000137077	CCL21	chemokine (C-C motif) ligand 21
ENSG00000138131	LOXL4	lysyl oxidase-like 4
ENSG00000177272	KCNA3	potassium voltage-gated channel, shaker-related subfamily, member 3
ENSG00000197410	DCHS2	dachsous 2 (Drosophila)
ENSG00000156234	CXCL13	chemokine (C-X-C motif) ligand 13
ENSG00000147168	IL2RG	interleukin 2 receptor, gamma (severe combined immunodeficiency)
ENSG00000076662	ICAM3	intercellular adhesion molecule 3
ENSG00000104415	WISP1	WNT1 inducible signaling pathway protein 1
ENSG00000108622	ICAM2	intercellular adhesion molecule 2
ENSG00000051108	HERPUD1	homocysteine-inducible, endoplasmic reticulum stress-inducible, ubiquitin-like domain member 1
ENSG00000112175	BMP5	bone morphogenetic protein 5
ENSG00000133110	POSTN	periostin, osteoblast specific factor
ENSG00000203710	CR1	complement component (3b/4b) receptor 1 (Knops blood group)
ENSG00000143226	FCGR2A	Fc fragment of IgG, low affinity IIa, receptor (CD32)
ENSG00000143603	KCNN3	potassium intermediate/small conductance calcium-activated channel, subfamily N, member 3
ENSG00000015413	DPEP1	dipeptidase 1 (renal)
ENSG00000134765	DSC1	desmocollin 1
ENSG00000170558	CDH2	cadherin 2, type 1, N-cadherin (neuronal)
ENSG00000105851	PIK3CG	phosphoinositide-3-kinase, catalytic, gamma polypeptide
ENSG00000198759	EGFL6	EGF-like-domain, multiple 6
ENSG00000196549	MME	membrane metallo-endopeptidase
ENSG00000117152	RGS4	regulator of G-protein signaling 4
ENSG00000160683	CXCR5	chemokine (C-X-C motif) receptor 5
ENSG00000115165	CYTIP	cytohesin 1 interacting protein
ENSG00000172578	KLHL6	kelch-like 6 (Drosophila)
ENSG00000142224	IL19	interleukin 19
ENSG00000173432	SAA1	serum amyloid A1
ENSG00000174123	TLR10	toll-like receptor 10
ENSG00000186472	PCLO	piccolo (presynaptic cytomatrix protein)
ENSG00000134516	DOCK2	dedicator of cytokinesis 2
ENSG00000169435	RASSF6	Ras association (RalGDS/AF-6) domain family member 6
ENSG00000141968	VAV1	vav 1 guanine nucleotide exchange factor
ENSG00000197943	PLCG2	phospholipase C, gamma 2 (phosphatidylinositol-specific)
ENSG00000102879	CORO1A	coronin, actin binding protein, 1A
ENSG00000148677	ANKRD1	ankyrin repeat domain 1 (cardiac muscle)
ENSG00000177575	CD163	CD163 molecule
ENSG00000155307	SAMSN1	SAM domain, SH3 domain and nuclear localization signals 1
ENSG00000165168	CYBB	cytochrome b-245, beta polypeptide
ENSG00000110777	POU2AF1	POU class 2 associating factor 1
ENSG00000185686	PRAME	preferentially expressed antigen in melanoma
ENSG00000023445	BIRC3	baculoviral IAP repeat-containing 3
ENSG00000145423	SFRP2	secreted frizzled-related protein 2
ENSG00000170458	CD14	CD14 molecule
ENSG00000162747	FCGR3B	Fc fragment of IgG, low affinity IIIb, receptor (CD16b)
ENSG00000091128	LAMB4	laminin, beta 4
ENSG00000057019	DCBLD2	discoidin, CUB and LCCL domain containing 2
ENSG00000161405	IKZF3	IKAROS family zinc finger 3 (Aiolos)
ENSG00000166501	PRKCB	protein kinase C, beta
ENSG00000054356	PTPRN	protein tyrosine phosphatase, receptor type, N
ENSG00000163739	CXCL1	chemokine (C-X-C motif) ligand 1 (melanoma growth stimulating activity, alpha)
ENSG00000155495	MAGEC1	melanoma antigen family C, 1
ENSG00000134873	CLDN10	claudin 10
ENSG00000187689	AMTN	amelotin
ENSG00000100985	MMP9	matrix metallopeptidase 9 (gelatinase B, 92kDa gelatinase, 92kDa type IV collagenase)
ENSG00000122862	SRGN	serglycin
ENSG00000090382	LYZ	lysozyme (renal amyloidosis)
ENSG00000165966	PDZRN4	PDZ domain containing ring finger 4
ENSG00000101680	LAMA1	laminin, alpha 1
ENSG00000091129	NRCAM	neuronal cell adhesion molecule
ENSG00000090104	RGS1	regulator of G-protein signaling 1
ENSG00000100368	CSF2RB	colony stimulating factor 2 receptor, beta, low-affinity (granulocyte-macrophage)
ENSG00000172349	IL16	interleukin 16 (lymphocyte chemoattractant factor)
ENSG00000137265	IRF4	interferon regulatory factor 4
ENSG00000108342	CSF3	colony stimulating factor 3 (granulocyte)
ENSG00000122224	LY9	lymphocyte antigen 9
ENSG00000175928	LRRN1	leucine rich repeat neuronal 1
ENSG00000101210	EEF1A2	eukaryotic translation elongation factor 1 alpha 2
ENSG00000122188	LAX1	lymphocyte transmembrane adaptor 1
ENSG00000107562	CXCL12	chemokine (C-X-C motif) ligand 12 (stromal cell-derived factor 1)
ENSG00000136960	ENPP2	ectonucleotide pyrophosphatase/phosphodiesterase 2
ENSG00000196092	PAX5	paired box 5
ENSG00000061656	SPAG4	sperm associated antigen 4
ENSG00000140961	OSGIN1	oxidative stress induced growth inhibitor 1
ENSG00000072694	FCGR2B	Fc fragment of IgG, low affinity IIb, receptor (CD32)
ENSG00000058335	RASGRF1	Ras protein-specific guanine nucleotide-releasing factor 1
ENSG00000168421	RHOH	ras homolog gene family, member H
ENSG00000110324	IL10RA	interleukin 10 receptor, alpha
ENSG00000163507	KIAA1524	KIAA1524
ENSG00000081237	PTPRC	protein tyrosine phosphatase, receptor type, C
ENSG00000121966	CXCR4	chemokine (C-X-C motif) receptor 4
ENSG00000154736	ADAMTS5	ADAM metallopeptidase with thrombospondin type 1 motif, 5
ENSG00000104814	MAP4K1	mitogen-activated protein kinase kinase kinase kinase 1
ENSG00000180353	HCLS1	hematopoietic cell-specific Lyn substrate 1
ENSG00000106483	SFRP4	secreted frizzled-related protein 4
ENSG00000168685	IL7R	interleukin 7 receptor
ENSG00000123329	ARHGAP9	Rho GTPase activating protein 9
ENSG00000152208	GRID2	glutamate receptor, ionotropic, delta 2
ENSG00000100219	XBP1	X-box binding protein 1
ENSG00000172867	KRT2	keratin 2
ENSG00000166897	ELFN2	extracellular leucine-rich repeat and fibronectin type III domain containing 2
ENSG00000198794	SCAMP5	secretory carrier membrane protein 5
ENSG00000102096	PIM2	pim-2 oncogene
ENSG00000125378	BMP4	bone morphogenetic protein 4
ENSG00000159184	HOXB13	homeobox B13
ENSG00000048462	TNFRSF17	tumor necrosis factor receptor superfamily, member 17
ENSG00000006074	CCL18	chemokine (C-C motif) ligand 18 (pulmonary and activation-regulated)
ENSG00000198910	L1CAM	L1 cell adhesion molecule
chemokine activity----GO:0008009
C=47;O=8;E=0.76;R=10.46;rawP=7.99e-07;adjP=4.16e-05
ENSG00000163739	CXCL1	chemokine (C-X-C motif) ligand 1 (melanoma growth stimulating activity, alpha)
ENSG00000137077	CCL21	chemokine (C-C motif) ligand 21
ENSG00000163735	CXCL5	chemokine (C-X-C motif) ligand 5
ENSG00000107562	CXCL12	chemokine (C-X-C motif) ligand 12 (stromal cell-derived factor 1)
ENSG00000156234	CXCL13	chemokine (C-X-C motif) ligand 13
ENSG00000006074	CCL18	chemokine (C-C motif) ligand 18 (pulmonary and activation-regulated)
ENSG00000169429	IL8	interleukin 8
ENSG00000124875	CXCL6	chemokine (C-X-C motif) ligand 6 (granulocyte chemotactic protein 2)
chemokine receptor binding----GO:0042379
C=49;O=8;E=0.80;R=10.03;rawP=1.11e-06;adjP=4.16e-05
ENSG00000163739	CXCL1	chemokine (C-X-C motif) ligand 1 (melanoma growth stimulating activity, alpha)
ENSG00000137077	CCL21	chemokine (C-C motif) ligand 21
ENSG00000163735	CXCL5	chemokine (C-X-C motif) ligand 5
ENSG00000107562	CXCL12	chemokine (C-X-C motif) ligand 12 (stromal cell-derived factor 1)
ENSG00000156234	CXCL13	chemokine (C-X-C motif) ligand 13
ENSG00000006074	CCL18	chemokine (C-C motif) ligand 18 (pulmonary and activation-regulated)
ENSG00000169429	IL8	interleukin 8
ENSG00000124875	CXCL6	chemokine (C-X-C motif) ligand 6 (granulocyte chemotactic protein 2)
cytokine activity----GO:0005125
C=196;O=13;E=3.19;R=4.08;rawP=1.98e-05;adjP=0.0006
ENSG00000163735	CXCL5	chemokine (C-X-C motif) ligand 5
ENSG00000172349	IL16	interleukin 16 (lymphocyte chemoattractant factor)
ENSG00000108342	CSF3	colony stimulating factor 3 (granulocyte)
ENSG00000156234	CXCL13	chemokine (C-X-C motif) ligand 13
ENSG00000169429	IL8	interleukin 8
ENSG00000124875	CXCL6	chemokine (C-X-C motif) ligand 6 (granulocyte chemotactic protein 2)
ENSG00000137077	CCL21	chemokine (C-C motif) ligand 21
ENSG00000163739	CXCL1	chemokine (C-X-C motif) ligand 1 (melanoma growth stimulating activity, alpha)
ENSG00000142224	IL19	interleukin 19
ENSG00000125378	BMP4	bone morphogenetic protein 4
ENSG00000107562	CXCL12	chemokine (C-X-C motif) ligand 12 (stromal cell-derived factor 1)
ENSG00000006074	CCL18	chemokine (C-C motif) ligand 18 (pulmonary and activation-regulated)
ENSG00000112175	BMP5	bone morphogenetic protein 5
receptor binding----GO:0005102
C=856;O=31;E=13.93;R=2.23;rawP=2.46e-05;adjP=0.0007
ENSG00000125730	C3	complement component 3
ENSG00000093072	CECR1	cat eye syndrome chromosome region, candidate 1
ENSG00000058335	RASGRF1	Ras protein-specific guanine nucleotide-releasing factor 1
ENSG00000185686	PRAME	preferentially expressed antigen in melanoma
ENSG00000156234	CXCL13	chemokine (C-X-C motif) ligand 13
ENSG00000136040	PLXNC1	plexin C1
ENSG00000124875	CXCL6	chemokine (C-X-C motif) ligand 6 (granulocyte chemotactic protein 2)
ENSG00000076662	ICAM3	intercellular adhesion molecule 3
ENSG00000142224	IL19	interleukin 19
ENSG00000173432	SAA1	serum amyloid A1
ENSG00000108622	ICAM2	intercellular adhesion molecule 2
ENSG00000101680	LAMA1	laminin, alpha 1
ENSG00000134516	DOCK2	dedicator of cytokinesis 2
ENSG00000112175	BMP5	bone morphogenetic protein 5
ENSG00000163735	CXCL5	chemokine (C-X-C motif) ligand 5
ENSG00000168081	PNOC	prepronociceptin
ENSG00000172349	IL16	interleukin 16 (lymphocyte chemoattractant factor)
ENSG00000108342	CSF3	colony stimulating factor 3 (granulocyte)
ENSG00000154736	ADAMTS5	ADAM metallopeptidase with thrombospondin type 1 motif, 5
ENSG00000145113	MUC4	mucin 4, cell surface associated
ENSG00000169429	IL8	interleukin 8
ENSG00000119699	TGFB3	transforming growth factor, beta 3
ENSG00000163739	CXCL1	chemokine (C-X-C motif) ligand 1 (melanoma growth stimulating activity, alpha)
ENSG00000137077	CCL21	chemokine (C-C motif) ligand 21
ENSG00000125378	BMP4	bone morphogenetic protein 4
ENSG00000107562	CXCL12	chemokine (C-X-C motif) ligand 12 (stromal cell-derived factor 1)
ENSG00000129988	LBP	lipopolysaccharide binding protein
ENSG00000006074	CCL18	chemokine (C-C motif) ligand 18 (pulmonary and activation-regulated)
ENSG00000198910	L1CAM	L1 cell adhesion molecule
ENSG00000198759	EGFL6	EGF-like-domain, multiple 6
ENSG00000140961	OSGIN1	oxidative stress induced growth inhibitor 1
pattern binding----GO:0001871
C=153;O=11;E=2.49;R=4.42;rawP=4.15e-05;adjP=0.0009
ENSG00000081237	PTPRC	protein tyrosine phosphatase, receptor type, C
ENSG00000133110	POSTN	periostin, osteoblast specific factor
ENSG00000174175	SELP	selectin P (granule membrane protein 140kDa, antigen CD62)
ENSG00000038427	VCAN	versican
ENSG00000124875	CXCL6	chemokine (C-X-C motif) ligand 6 (granulocyte chemotactic protein 2)
ENSG00000133800	LYVE1	lymphatic vessel endothelial hyaluronan receptor 1
ENSG00000010327	STAB1	stabilin 1
ENSG00000125378	BMP4	bone morphogenetic protein 4
ENSG00000170458	CD14	CD14 molecule
ENSG00000136960	ENPP2	ectonucleotide pyrophosphatase/phosphodiesterase 2
ENSG00000145681	HAPLN1	hyaluronan and proteoglycan link protein 1
polysaccharide binding----GO:0030247
C=153;O=11;E=2.49;R=4.42;rawP=4.15e-05;adjP=0.0009
ENSG00000081237	PTPRC	protein tyrosine phosphatase, receptor type, C
ENSG00000133110	POSTN	periostin, osteoblast specific factor
ENSG00000174175	SELP	selectin P (granule membrane protein 140kDa, antigen CD62)
ENSG00000038427	VCAN	versican
ENSG00000124875	CXCL6	chemokine (C-X-C motif) ligand 6 (granulocyte chemotactic protein 2)
ENSG00000133800	LYVE1	lymphatic vessel endothelial hyaluronan receptor 1
ENSG00000010327	STAB1	stabilin 1
ENSG00000125378	BMP4	bone morphogenetic protein 4
ENSG00000170458	CD14	CD14 molecule
ENSG00000136960	ENPP2	ectonucleotide pyrophosphatase/phosphodiesterase 2
ENSG00000145681	HAPLN1	hyaluronan and proteoglycan link protein 1
metalloendopeptidase activity----GO:0004222
C=103;O=9;E=1.68;R=5.37;rawP=4.59e-05;adjP=0.0009
ENSG00000100985	MMP9	matrix metallopeptidase 9 (gelatinase B, 92kDa gelatinase, 92kDa type IV collagenase)
ENSG00000042980	ADAM28	ADAM metallopeptidase domain 28
ENSG00000154736	ADAMTS5	ADAM metallopeptidase with thrombospondin type 1 motif, 5
ENSG00000125966	MMP24	matrix metallopeptidase 24 (membrane-inserted)
ENSG00000137673	MMP7	matrix metallopeptidase 7 (matrilysin, uterine)
ENSG00000149968	MMP3	matrix metallopeptidase 3 (stromelysin 1, progelatinase)
ENSG00000196611	MMP1	matrix metallopeptidase 1 (interstitial collagenase)
ENSG00000137745	MMP13	matrix metallopeptidase 13 (collagenase 3)
ENSG00000196549	MME	membrane metallo-endopeptidase
cytokine binding----GO:0019955
C=108;O=9;E=1.76;R=5.12;rawP=6.67e-05;adjP=0.0012
ENSG00000100368	CSF2RB	colony stimulating factor 2 receptor, beta, low-affinity (granulocyte-macrophage)
ENSG00000160683	CXCR5	chemokine (C-X-C motif) receptor 5
ENSG00000121966	CXCR4	chemokine (C-X-C motif) receptor 4
ENSG00000168685	IL7R	interleukin 7 receptor
ENSG00000147168	IL2RG	interleukin 2 receptor, gamma (severe combined immunodeficiency)
ENSG00000183691	NOG	noggin
ENSG00000119699	TGFB3	transforming growth factor, beta 3
ENSG00000134460	IL2RA	interleukin 2 receptor, alpha
ENSG00000110324	IL10RA	interleukin 10 receptor, alpha
G-protein-coupled receptor binding----GO:0001664
C=107;O=9;E=1.74;R=5.17;rawP=6.20e-05;adjP=0.0012
ENSG00000163735	CXCL5	chemokine (C-X-C motif) ligand 5
ENSG00000156234	CXCL13	chemokine (C-X-C motif) ligand 13
ENSG00000169429	IL8	interleukin 8
ENSG00000124875	CXCL6	chemokine (C-X-C motif) ligand 6 (granulocyte chemotactic protein 2)
ENSG00000137077	CCL21	chemokine (C-C motif) ligand 21
ENSG00000163739	CXCL1	chemokine (C-X-C motif) ligand 1 (melanoma growth stimulating activity, alpha)
ENSG00000107562	CXCL12	chemokine (C-X-C motif) ligand 12 (stromal cell-derived factor 1)
ENSG00000173432	SAA1	serum amyloid A1
ENSG00000006074	CCL18	chemokine (C-C motif) ligand 18 (pulmonary and activation-regulated)
scavenger receptor activity----GO:0005044
C=45;O=6;E=0.73;R=8.19;rawP=8.37e-05;adjP=0.0013
ENSG00000010327	STAB1	stabilin 1
ENSG00000138131	LOXL4	lysyl oxidase-like 4
ENSG00000177575	CD163	CD163 molecule
ENSG00000136960	ENPP2	ectonucleotide pyrophosphatase/phosphodiesterase 2
ENSG00000137648	TMPRSS4	transmembrane protease, serine 4
ENSG00000205403	CFI	complement factor I
glycosaminoglycan binding----GO:0005539
C=139;O=10;E=2.26;R=4.42;rawP=9.22e-05;adjP=0.0014
ENSG00000081237	PTPRC	protein tyrosine phosphatase, receptor type, C
ENSG00000133110	POSTN	periostin, osteoblast specific factor
ENSG00000174175	SELP	selectin P (granule membrane protein 140kDa, antigen CD62)
ENSG00000038427	VCAN	versican
ENSG00000124875	CXCL6	chemokine (C-X-C motif) ligand 6 (granulocyte chemotactic protein 2)
ENSG00000133800	LYVE1	lymphatic vessel endothelial hyaluronan receptor 1
ENSG00000010327	STAB1	stabilin 1
ENSG00000125378	BMP4	bone morphogenetic protein 4
ENSG00000170458	CD14	CD14 molecule
ENSG00000145681	HAPLN1	hyaluronan and proteoglycan link protein 1
metallopeptidase activity----GO:0008237
C=183;O=11;E=2.98;R=3.69;rawP=0.0002;adjP=0.0026
ENSG00000100985	MMP9	matrix metallopeptidase 9 (gelatinase B, 92kDa gelatinase, 92kDa type IV collagenase)
ENSG00000042980	ADAM28	ADAM metallopeptidase domain 28
ENSG00000154736	ADAMTS5	ADAM metallopeptidase with thrombospondin type 1 motif, 5
ENSG00000125966	MMP24	matrix metallopeptidase 24 (membrane-inserted)
ENSG00000137673	MMP7	matrix metallopeptidase 7 (matrilysin, uterine)
ENSG00000149968	MMP3	matrix metallopeptidase 3 (stromelysin 1, progelatinase)
ENSG00000182752	PAPPA	pregnancy-associated plasma protein A, pappalysin 1
ENSG00000196611	MMP1	matrix metallopeptidase 1 (interstitial collagenase)
ENSG00000015413	DPEP1	dipeptidase 1 (renal)
ENSG00000137745	MMP13	matrix metallopeptidase 13 (collagenase 3)
ENSG00000196549	MME	membrane metallo-endopeptidase
hyaluronic acid binding----GO:0005540
C=19;O=4;E=0.31;R=12.94;rawP=0.0002;adjP=0.0026
ENSG00000133800	LYVE1	lymphatic vessel endothelial hyaluronan receptor 1
ENSG00000010327	STAB1	stabilin 1
ENSG00000038427	VCAN	versican
ENSG00000145681	HAPLN1	hyaluronan and proteoglycan link protein 1
interleukin-7 receptor activity----GO:0004917
C=2;O=2;E=0.03;R=61.46;rawP=0.0003;adjP=0.0032
ENSG00000168685	IL7R	interleukin 7 receptor
ENSG00000147168	IL2RG	interleukin 2 receptor, gamma (severe combined immunodeficiency)
interleukin-7 binding----GO:0019982
C=2;O=2;E=0.03;R=61.46;rawP=0.0003;adjP=0.0032
ENSG00000168685	IL7R	interleukin 7 receptor
ENSG00000147168	IL2RG	interleukin 2 receptor, gamma (severe combined immunodeficiency)
interleukin-7 binding----GO:0019982
C=2;O=2;E=0.03;R=61.46;rawP=0.0003;adjP=0.0032
ENSG00000168685	IL7R	interleukin 7 receptor
ENSG00000147168	IL2RG	interleukin 2 receptor, gamma (severe combined immunodeficiency)
IgG binding----GO:0019864
C=9;O=3;E=0.15;R=20.49;rawP=0.0003;adjP=0.0032
ENSG00000072694	FCGR2B	Fc fragment of IgG, low affinity IIb, receptor (CD32)
ENSG00000162747	FCGR3B	Fc fragment of IgG, low affinity IIIb, receptor (CD16b)
ENSG00000143226	FCGR2A	Fc fragment of IgG, low affinity IIa, receptor (CD32)
lipoteichoic acid binding----GO:0070891
C=2;O=2;E=0.03;R=61.46;rawP=0.0003;adjP=0.0032
ENSG00000170458	CD14	CD14 molecule
ENSG00000129988	LBP	lipopolysaccharide binding protein
carbohydrate binding----GO:0030246
C=349;O=15;E=5.68;R=2.64;rawP=0.0006;adjP=0.0061
ENSG00000081237	PTPRC	protein tyrosine phosphatase, receptor type, C
ENSG00000125810	CD93	CD93 molecule
ENSG00000100626	GALNTL1	UDP-N-acetyl-alpha-D-galactosamine:polypeptide N-acetylgalactosaminyltransferase-like 1
ENSG00000133110	POSTN	periostin, osteoblast specific factor
ENSG00000174175	SELP	selectin P (granule membrane protein 140kDa, antigen CD62)
ENSG00000038427	VCAN	versican
ENSG00000012124	CD22	CD22 molecule
ENSG00000124875	CXCL6	chemokine (C-X-C motif) ligand 6 (granulocyte chemotactic protein 2)
ENSG00000133800	LYVE1	lymphatic vessel endothelial hyaluronan receptor 1
ENSG00000010327	STAB1	stabilin 1
ENSG00000125378	BMP4	bone morphogenetic protein 4
ENSG00000170458	CD14	CD14 molecule
ENSG00000136960	ENPP2	ectonucleotide pyrophosphatase/phosphodiesterase 2
ENSG00000198910	L1CAM	L1 cell adhesion molecule
ENSG00000145681	HAPLN1	hyaluronan and proteoglycan link protein 1
sialic acid binding----GO:0033691
C=3;O=2;E=0.05;R=40.97;rawP=0.0008;adjP=0.0067
ENSG00000174175	SELP	selectin P (granule membrane protein 140kDa, antigen CD62)
ENSG00000198910	L1CAM	L1 cell adhesion molecule
lipopolysaccharide binding----GO:0001530
C=12;O=3;E=0.20;R=15.36;rawP=0.0008;adjP=0.0067
ENSG00000170458	CD14	CD14 molecule
ENSG00000129988	LBP	lipopolysaccharide binding protein
ENSG00000174175	SELP	selectin P (granule membrane protein 140kDa, antigen CD62)
cytokine receptor binding----GO:0005126
C=178;O=10;E=2.90;R=3.45;rawP=0.0007;adjP=0.0067
ENSG00000163735	CXCL5	chemokine (C-X-C motif) ligand 5
ENSG00000108342	CSF3	colony stimulating factor 3 (granulocyte)
ENSG00000156234	CXCL13	chemokine (C-X-C motif) ligand 13
ENSG00000169429	IL8	interleukin 8
ENSG00000119699	TGFB3	transforming growth factor, beta 3
ENSG00000124875	CXCL6	chemokine (C-X-C motif) ligand 6 (granulocyte chemotactic protein 2)
ENSG00000137077	CCL21	chemokine (C-C motif) ligand 21
ENSG00000163739	CXCL1	chemokine (C-X-C motif) ligand 1 (melanoma growth stimulating activity, alpha)
ENSG00000107562	CXCL12	chemokine (C-X-C motif) ligand 12 (stromal cell-derived factor 1)
ENSG00000006074	CCL18	chemokine (C-C motif) ligand 18 (pulmonary and activation-regulated)
interleukin-2 binding----GO:0019976
C=3;O=2;E=0.05;R=40.97;rawP=0.0008;adjP=0.0067
ENSG00000134460	IL2RA	interleukin 2 receptor, alpha
ENSG00000147168	IL2RG	interleukin 2 receptor, gamma (severe combined immunodeficiency)
interleukin-2 receptor activity----GO:0004911
C=3;O=2;E=0.05;R=40.97;rawP=0.0008;adjP=0.0067
ENSG00000134460	IL2RA	interleukin 2 receptor, alpha
ENSG00000147168	IL2RG	interleukin 2 receptor, gamma (severe combined immunodeficiency)
endopeptidase activity----GO:0004175
C=370;O=15;E=6.02;R=2.49;rawP=0.0011;adjP=0.0088
ENSG00000100985	MMP9	matrix metallopeptidase 9 (gelatinase B, 92kDa gelatinase, 92kDa type IV collagenase)
ENSG00000042980	ADAM28	ADAM metallopeptidase domain 28
ENSG00000154736	ADAMTS5	ADAM metallopeptidase with thrombospondin type 1 motif, 5
ENSG00000125966	MMP24	matrix metallopeptidase 24 (membrane-inserted)
ENSG00000163131	CTSS	cathepsin S
ENSG00000137673	MMP7	matrix metallopeptidase 7 (matrilysin, uterine)
ENSG00000149968	MMP3	matrix metallopeptidase 3 (stromelysin 1, progelatinase)
ENSG00000205403	CFI	complement factor I
ENSG00000196611	MMP1	matrix metallopeptidase 1 (interstitial collagenase)
ENSG00000182326	C1S	complement component 1, s subcomponent
ENSG00000137745	MMP13	matrix metallopeptidase 13 (collagenase 3)
ENSG00000104368	PLAT	plasminogen activator, tissue
ENSG00000012223	LTF	lactotransferrin
ENSG00000137648	TMPRSS4	transmembrane protease, serine 4
ENSG00000196549	MME	membrane metallo-endopeptidase
troponin T binding----GO:0031014
C=4;O=2;E=0.07;R=30.73;rawP=0.0015;adjP=0.0112
ENSG00000114854	TNNC1	troponin C type 1 (slow)
ENSG00000105048	TNNT1	troponin T type 1 (skeletal, slow)
growth factor binding----GO:0019838
C=103;O=7;E=1.68;R=4.18;rawP=0.0015;adjP=0.0112
ENSG00000100368	CSF2RB	colony stimulating factor 2 receptor, beta, low-affinity (granulocyte-macrophage)
ENSG00000104415	WISP1	WNT1 inducible signaling pathway protein 1
ENSG00000134460	IL2RA	interleukin 2 receptor, alpha
ENSG00000168685	IL7R	interleukin 7 receptor
ENSG00000110324	IL10RA	interleukin 10 receptor, alpha
ENSG00000147168	IL2RG	interleukin 2 receptor, gamma (severe combined immunodeficiency)
ENSG00000119699	TGFB3	transforming growth factor, beta 3
protein dimerization activity----GO:0046983
C=514;O=18;E=8.36;R=2.15;rawP=0.0019;adjP=0.0136
ENSG00000114854	TNNC1	troponin C type 1 (slow)
ENSG00000005844	ITGAL	integrin, alpha L (antigen CD11A (p180), lymphocyte function-associated antigen 1; alpha polypeptide)
ENSG00000108405	P2RX1	purinergic receptor P2X, ligand-gated ion channel, 1
ENSG00000100365	NCF4	neutrophil cytosolic factor 4, 40kDa
ENSG00000167861	C17orf28	chromosome 17 open reading frame 28
ENSG00000090376	IRAK3	interleukin-1 receptor-associated kinase 3
ENSG00000117724	CENPF	centromere protein F, 350/400ka (mitosin)
ENSG00000107807	TLX1	T-cell leukemia homeobox 1
ENSG00000161405	IKZF3	IKAROS family zinc finger 3 (Aiolos)
ENSG00000051523	CYBA	cytochrome b-245, alpha polypeptide
ENSG00000115919	KYNU	kynureninase (L-kynurenine hydrolase)
ENSG00000100219	XBP1	X-box binding protein 1
ENSG00000183691	NOG	noggin
ENSG00000169962	TAS1R3	taste receptor, type 1, member 3
ENSG00000119699	TGFB3	transforming growth factor, beta 3
ENSG00000125378	BMP4	bone morphogenetic protein 4
ENSG00000102879	CORO1A	coronin, actin binding protein, 1A
ENSG00000165168	CYBB	cytochrome b-245, beta polypeptide
cytokine receptor activity----GO:0004896
C=55;O=5;E=0.89;R=5.59;rawP=0.0020;adjP=0.0136
ENSG00000100368	CSF2RB	colony stimulating factor 2 receptor, beta, low-affinity (granulocyte-macrophage)
ENSG00000134460	IL2RA	interleukin 2 receptor, alpha
ENSG00000168685	IL7R	interleukin 7 receptor
ENSG00000110324	IL10RA	interleukin 10 receptor, alpha
ENSG00000147168	IL2RG	interleukin 2 receptor, gamma (severe combined immunodeficiency)
calcium ion binding----GO:0005509
C=915;O=27;E=14.89;R=1.81;rawP=0.0020;adjP=0.0136
ENSG00000100985	MMP9	matrix metallopeptidase 9 (gelatinase B, 92kDa gelatinase, 92kDa type IV collagenase)
ENSG00000127507	EMR2	egf-like module containing, mucin-like, hormone receptor-like 2
ENSG00000125810	CD93	CD93 molecule
ENSG00000114854	TNNC1	troponin C type 1 (slow)
ENSG00000100626	GALNTL1	UDP-N-acetyl-alpha-D-galactosamine:polypeptide N-acetylgalactosaminyltransferase-like 1
ENSG00000005844	ITGAL	integrin, alpha L (antigen CD11A (p180), lymphocyte function-associated antigen 1; alpha polypeptide)
ENSG00000125966	MMP24	matrix metallopeptidase 24 (membrane-inserted)
ENSG00000077943	ITGA8	integrin, alpha 8
ENSG00000074370	ATP2A3	ATPase, Ca++ transporting, ubiquitous
ENSG00000196611	MMP1	matrix metallopeptidase 1 (interstitial collagenase)
ENSG00000138829	FBN2	fibrillin 2
ENSG00000186472	PCLO	piccolo (presynaptic cytomatrix protein)
ENSG00000184330	S100A7A	S100 calcium binding protein A7A
ENSG00000137673	MMP7	matrix metallopeptidase 7 (matrilysin, uterine)
ENSG00000149968	MMP3	matrix metallopeptidase 3 (stromelysin 1, progelatinase)
ENSG00000166501	PRKCB	protein kinase C, beta
ENSG00000177706	FAM20C	family with sequence similarity 20, member C
ENSG00000117215	PLA2G2D	phospholipase A2, group IID
ENSG00000038427	VCAN	versican
ENSG00000197943	PLCG2	phospholipase C, gamma 2 (phosphatidylinositol-specific)
ENSG00000182326	C1S	complement component 1, s subcomponent
ENSG00000137745	MMP13	matrix metallopeptidase 13 (collagenase 3)
ENSG00000183166	CALN1	calneuron 1
ENSG00000134765	DSC1	desmocollin 1
ENSG00000170558	CDH2	cadherin 2, type 1, N-cadherin (neuronal)
ENSG00000198759	EGFL6	EGF-like-domain, multiple 6
ENSG00000197410	DCHS2	dachsous 2 (Drosophila)
immunoglobulin binding----GO:0019865
C=17;O=3;E=0.28;R=10.85;rawP=0.0024;adjP=0.0159
ENSG00000072694	FCGR2B	Fc fragment of IgG, low affinity IIb, receptor (CD32)
ENSG00000162747	FCGR3B	Fc fragment of IgG, low affinity IIIb, receptor (CD16b)
ENSG00000143226	FCGR2A	Fc fragment of IgG, low affinity IIa, receptor (CD32)
integrin binding----GO:0005178
C=58;O=5;E=0.94;R=5.30;rawP=0.0025;adjP=0.0161
ENSG00000076662	ICAM3	intercellular adhesion molecule 3
ENSG00000154736	ADAMTS5	ADAM metallopeptidase with thrombospondin type 1 motif, 5
ENSG00000108622	ICAM2	intercellular adhesion molecule 2
ENSG00000198910	L1CAM	L1 cell adhesion molecule
ENSG00000198759	EGFL6	EGF-like-domain, multiple 6
superoxide-generating NADPH oxidase activity----GO:0016175
C=5;O=2;E=0.08;R=24.58;rawP=0.0026;adjP=0.0163
ENSG00000051523	CYBA	cytochrome b-245, alpha polypeptide
ENSG00000165168	CYBB	cytochrome b-245, beta polypeptide
heme binding----GO:0020037
C=119;O=7;E=1.94;R=3.62;rawP=0.0033;adjP=0.0201
ENSG00000019186	CYP24A1	cytochrome P450, family 24, subfamily A, polypeptide 1
ENSG00000213931	HBE1	hemoglobin, epsilon 1
ENSG00000051523	CYBA	cytochrome b-245, alpha polypeptide
ENSG00000151790	TDO2	tryptophan 2,3-dioxygenase
ENSG00000188536	HBA2	hemoglobin, alpha 2
ENSG00000134516	DOCK2	dedicator of cytokinesis 2
ENSG00000165168	CYBB	cytochrome b-245, beta polypeptide
Rac guanyl-nucleotide exchange factor activity----GO:0030676
C=6;O=2;E=0.10;R=20.49;rawP=0.0038;adjP=0.0214
ENSG00000141968	VAV1	vav 1 guanine nucleotide exchange factor
ENSG00000134516	DOCK2	dedicator of cytokinesis 2
peptidase activity, acting on L-amino acid peptides----GO:0070011
C=546;O=18;E=8.88;R=2.03;rawP=0.0037;adjP=0.0214
ENSG00000100985	MMP9	matrix metallopeptidase 9 (gelatinase B, 92kDa gelatinase, 92kDa type IV collagenase)
ENSG00000125966	MMP24	matrix metallopeptidase 24 (membrane-inserted)
ENSG00000182752	PAPPA	pregnancy-associated plasma protein A, pappalysin 1
ENSG00000205403	CFI	complement factor I
ENSG00000166562	SEC11C	SEC11 homolog C (S. cerevisiae)
ENSG00000196611	MMP1	matrix metallopeptidase 1 (interstitial collagenase)
ENSG00000104368	PLAT	plasminogen activator, tissue
ENSG00000137648	TMPRSS4	transmembrane protease, serine 4
ENSG00000012223	LTF	lactotransferrin
ENSG00000042980	ADAM28	ADAM metallopeptidase domain 28
ENSG00000154736	ADAMTS5	ADAM metallopeptidase with thrombospondin type 1 motif, 5
ENSG00000137673	MMP7	matrix metallopeptidase 7 (matrilysin, uterine)
ENSG00000163131	CTSS	cathepsin S
ENSG00000149968	MMP3	matrix metallopeptidase 3 (stromelysin 1, progelatinase)
ENSG00000015413	DPEP1	dipeptidase 1 (renal)
ENSG00000182326	C1S	complement component 1, s subcomponent
ENSG00000137745	MMP13	matrix metallopeptidase 13 (collagenase 3)
ENSG00000196549	MME	membrane metallo-endopeptidase
protein heterodimerization activity----GO:0046982
C=189;O=9;E=3.08;R=2.93;rawP=0.0038;adjP=0.0214
ENSG00000005844	ITGAL	integrin, alpha L (antigen CD11A (p180), lymphocyte function-associated antigen 1; alpha polypeptide)
ENSG00000108405	P2RX1	purinergic receptor P2X, ligand-gated ion channel, 1
ENSG00000161405	IKZF3	IKAROS family zinc finger 3 (Aiolos)
ENSG00000051523	CYBA	cytochrome b-245, alpha polypeptide
ENSG00000090376	IRAK3	interleukin-1 receptor-associated kinase 3
ENSG00000119699	TGFB3	transforming growth factor, beta 3
ENSG00000169962	TAS1R3	taste receptor, type 1, member 3
ENSG00000107807	TLX1	T-cell leukemia homeobox 1
ENSG00000165168	CYBB	cytochrome b-245, beta polypeptide

## Sheet: Cellular component
Gene Ontology enrichment analysis (Cellular component) of differentially expressed genes.
extracellular region part----GO:0044421
C=939;O=49;E=15.43;R=3.18;rawP=4.12e-13;adjP=6.55e-11
Ensembl Gene stable ID	Gene symbol	Description
ENSG00000100985	MMP9	matrix metallopeptidase 9 (gelatinase B, 92kDa gelatinase, 92kDa type IV collagenase)
ENSG00000093072	CECR1	cat eye syndrome chromosome region, candidate 1
ENSG00000187689	AMTN	amelotin
ENSG00000109205	ODAM	odontogenic, ameloblast asssociated
ENSG00000000971	CFH	complement factor H
ENSG00000174175	SELP	selectin P (granule membrane protein 140kDa, antigen CD62)
ENSG00000122862	SRGN	serglycin
ENSG00000090382	LYZ	lysozyme (renal amyloidosis)
ENSG00000142224	IL19	interleukin 19
ENSG00000170381	SEMA3E	sema domain, immunoglobulin domain (Ig), short basic domain, secreted, (semaphorin) 3E
ENSG00000173432	SAA1	serum amyloid A1
ENSG00000101680	LAMA1	laminin, alpha 1
ENSG00000104368	PLAT	plasminogen activator, tissue
ENSG00000145681	HAPLN1	hyaluronan and proteoglycan link protein 1
ENSG00000172349	IL16	interleukin 16 (lymphocyte chemoattractant factor)
ENSG00000108342	CSF3	colony stimulating factor 3 (granulocyte)
ENSG00000137673	MMP7	matrix metallopeptidase 7 (matrilysin, uterine)
ENSG00000145113	MUC4	mucin 4, cell surface associated
ENSG00000064886	CHI3L2	chitinase 3-like 2
ENSG00000183691	NOG	noggin
ENSG00000119699	TGFB3	transforming growth factor, beta 3
ENSG00000137077	CCL21	chemokine (C-C motif) ligand 21
ENSG00000107562	CXCL12	chemokine (C-X-C motif) ligand 12 (stromal cell-derived factor 1)
ENSG00000138131	LOXL4	lysyl oxidase-like 4
ENSG00000137745	MMP13	matrix metallopeptidase 13 (collagenase 3)
ENSG00000125730	C3	complement component 3
ENSG00000156234	CXCL13	chemokine (C-X-C motif) ligand 13
ENSG00000125966	MMP24	matrix metallopeptidase 24 (membrane-inserted)
ENSG00000139329	LUM	lumican
ENSG00000205403	CFI	complement factor I
ENSG00000124875	CXCL6	chemokine (C-X-C motif) ligand 6 (granulocyte chemotactic protein 2)
ENSG00000196611	MMP1	matrix metallopeptidase 1 (interstitial collagenase)
ENSG00000138829	FBN2	fibrillin 2
ENSG00000091128	LAMB4	laminin, beta 4
ENSG00000112175	BMP5	bone morphogenetic protein 5
ENSG00000163735	CXCL5	chemokine (C-X-C motif) ligand 5
ENSG00000154736	ADAMTS5	ADAM metallopeptidase with thrombospondin type 1 motif, 5
ENSG00000173372	C1QA	complement component 1, q subcomponent, A chain
ENSG00000133110	POSTN	periostin, osteoblast specific factor
ENSG00000149968	MMP3	matrix metallopeptidase 3 (stromelysin 1, progelatinase)
ENSG00000106483	SFRP4	secreted frizzled-related protein 4
ENSG00000038427	VCAN	versican
ENSG00000169429	IL8	interleukin 8
ENSG00000204291	COL15A1	collagen, type XV, alpha 1
ENSG00000163739	CXCL1	chemokine (C-X-C motif) ligand 1 (melanoma growth stimulating activity, alpha)
ENSG00000129988	LBP	lipopolysaccharide binding protein
ENSG00000125378	BMP4	bone morphogenetic protein 4
ENSG00000198759	EGFL6	EGF-like-domain, multiple 6
ENSG00000006074	CCL18	chemokine (C-C motif) ligand 18 (pulmonary and activation-regulated)
extracellular region----GO:0005576
C=1984;O=75;E=32.60;R=2.30;rawP=1.50e-12;adjP=1.19e-10
ENSG00000093072	CECR1	cat eye syndrome chromosome region, candidate 1
ENSG00000109205	ODAM	odontogenic, ameloblast asssociated
ENSG00000000971	CFH	complement factor H
ENSG00000132465	IGJ	immunoglobulin J polypeptide, linker protein for immunoglobulin alpha and mu polypeptides
ENSG00000142224	IL19	interleukin 19
ENSG00000173432	SAA1	serum amyloid A1
ENSG00000104368	PLAT	plasminogen activator, tissue
ENSG00000012223	LTF	lactotransferrin
ENSG00000145681	HAPLN1	hyaluronan and proteoglycan link protein 1
ENSG00000137673	MMP7	matrix metallopeptidase 7 (matrilysin, uterine)
ENSG00000145113	MUC4	mucin 4, cell surface associated
ENSG00000064886	CHI3L2	chitinase 3-like 2
ENSG00000183691	NOG	noggin
ENSG00000108950	FAM20A	family with sequence similarity 20, member A
ENSG00000170476	MGC29506	hypothetical protein MGC29506
ENSG00000177575	CD163	CD163 molecule
ENSG00000137745	MMP13	matrix metallopeptidase 13 (collagenase 3)
ENSG00000125730	C3	complement component 3
ENSG00000162745	OLFML2B	olfactomedin-like 2B
ENSG00000145423	SFRP2	secreted frizzled-related protein 2
ENSG00000139329	LUM	lumican
ENSG00000132185	FCRLA	Fc receptor-like A
ENSG00000124875	CXCL6	chemokine (C-X-C motif) ligand 6 (granulocyte chemotactic protein 2)
ENSG00000196611	MMP1	matrix metallopeptidase 1 (interstitial collagenase)
ENSG00000170866	LILRA3	leukocyte immunoglobulin-like receptor, subfamily A (without TM domain), member 3
ENSG00000170458	CD14	CD14 molecule
ENSG00000162747	FCGR3B	Fc fragment of IgG, low affinity IIIb, receptor (CD16b)
ENSG00000091128	LAMB4	laminin, beta 4
ENSG00000042980	ADAM28	ADAM metallopeptidase domain 28
ENSG00000163735	CXCL5	chemokine (C-X-C motif) ligand 5
ENSG00000168081	PNOC	prepronociceptin
ENSG00000173372	C1QA	complement component 1, q subcomponent, A chain
ENSG00000149968	MMP3	matrix metallopeptidase 3 (stromelysin 1, progelatinase)
ENSG00000169429	IL8	interleukin 8
ENSG00000204291	COL15A1	collagen, type XV, alpha 1
ENSG00000163739	CXCL1	chemokine (C-X-C motif) ligand 1 (melanoma growth stimulating activity, alpha)
ENSG00000129988	LBP	lipopolysaccharide binding protein
ENSG00000100985	MMP9	matrix metallopeptidase 9 (gelatinase B, 92kDa gelatinase, 92kDa type IV collagenase)
ENSG00000187689	AMTN	amelotin
ENSG00000174175	SELP	selectin P (granule membrane protein 140kDa, antigen CD62)
ENSG00000073849	ST6GAL1	ST6 beta-galactosamide alpha-2,6-sialyltranferase 1
ENSG00000182752	PAPPA	pregnancy-associated plasma protein A, pappalysin 1
ENSG00000122862	SRGN	serglycin
ENSG00000090382	LYZ	lysozyme (renal amyloidosis)
ENSG00000165457	FOLR2	folate receptor 2 (fetal)
ENSG00000170381	SEMA3E	sema domain, immunoglobulin domain (Ig), short basic domain, secreted, (semaphorin) 3E
ENSG00000139193	CD27	CD27 molecule
ENSG00000101680	LAMA1	laminin, alpha 1
ENSG00000172349	IL16	interleukin 16 (lymphocyte chemoattractant factor)
ENSG00000108342	CSF3	colony stimulating factor 3 (granulocyte)
ENSG00000163131	CTSS	cathepsin S
ENSG00000177706	FAM20C	family with sequence similarity 20, member C
ENSG00000119699	TGFB3	transforming growth factor, beta 3
ENSG00000137077	CCL21	chemokine (C-C motif) ligand 21
ENSG00000107562	CXCL12	chemokine (C-X-C motif) ligand 12 (stromal cell-derived factor 1)
ENSG00000138131	LOXL4	lysyl oxidase-like 4
ENSG00000136960	ENPP2	ectonucleotide pyrophosphatase/phosphodiesterase 2
ENSG00000125966	MMP24	matrix metallopeptidase 24 (membrane-inserted)
ENSG00000156234	CXCL13	chemokine (C-X-C motif) ligand 13
ENSG00000205403	CFI	complement factor I
ENSG00000104415	WISP1	WNT1 inducible signaling pathway protein 1
ENSG00000138829	FBN2	fibrillin 2
ENSG00000112175	BMP5	bone morphogenetic protein 5
ENSG00000154736	ADAMTS5	ADAM metallopeptidase with thrombospondin type 1 motif, 5
ENSG00000133110	POSTN	periostin, osteoblast specific factor
ENSG00000117215	PLA2G2D	phospholipase A2, group IID
ENSG00000168685	IL7R	interleukin 7 receptor
ENSG00000106483	SFRP4	secreted frizzled-related protein 4
ENSG00000038427	VCAN	versican
ENSG00000137558	PI15	peptidase inhibitor 15
ENSG00000182326	C1S	complement component 1, s subcomponent
ENSG00000125378	BMP4	bone morphogenetic protein 4
ENSG00000181617	C4orf7	chromosome 4 open reading frame 7
ENSG00000198759	EGFL6	EGF-like-domain, multiple 6
ENSG00000006074	CCL18	chemokine (C-C motif) ligand 18 (pulmonary and activation-regulated)
extracellular space----GO:0005615
C=670;O=35;E=11.01;R=3.18;rawP=1.36e-09;adjP=6.24e-08
ENSG00000100985	MMP9	matrix metallopeptidase 9 (gelatinase B, 92kDa gelatinase, 92kDa type IV collagenase)
ENSG00000093072	CECR1	cat eye syndrome chromosome region, candidate 1
ENSG00000000971	CFH	complement factor H
ENSG00000174175	SELP	selectin P (granule membrane protein 140kDa, antigen CD62)
ENSG00000122862	SRGN	serglycin
ENSG00000090382	LYZ	lysozyme (renal amyloidosis)
ENSG00000142224	IL19	interleukin 19
ENSG00000170381	SEMA3E	sema domain, immunoglobulin domain (Ig), short basic domain, secreted, (semaphorin) 3E
ENSG00000173432	SAA1	serum amyloid A1
ENSG00000104368	PLAT	plasminogen activator, tissue
ENSG00000172349	IL16	interleukin 16 (lymphocyte chemoattractant factor)
ENSG00000108342	CSF3	colony stimulating factor 3 (granulocyte)
ENSG00000137673	MMP7	matrix metallopeptidase 7 (matrilysin, uterine)
ENSG00000064886	CHI3L2	chitinase 3-like 2
ENSG00000183691	NOG	noggin
ENSG00000119699	TGFB3	transforming growth factor, beta 3
ENSG00000137077	CCL21	chemokine (C-C motif) ligand 21
ENSG00000107562	CXCL12	chemokine (C-X-C motif) ligand 12 (stromal cell-derived factor 1)
ENSG00000138131	LOXL4	lysyl oxidase-like 4
ENSG00000137745	MMP13	matrix metallopeptidase 13 (collagenase 3)
ENSG00000125730	C3	complement component 3
ENSG00000156234	CXCL13	chemokine (C-X-C motif) ligand 13
ENSG00000205403	CFI	complement factor I
ENSG00000124875	CXCL6	chemokine (C-X-C motif) ligand 6 (granulocyte chemotactic protein 2)
ENSG00000112175	BMP5	bone morphogenetic protein 5
ENSG00000163735	CXCL5	chemokine (C-X-C motif) ligand 5
ENSG00000149968	MMP3	matrix metallopeptidase 3 (stromelysin 1, progelatinase)
ENSG00000173372	C1QA	complement component 1, q subcomponent, A chain
ENSG00000106483	SFRP4	secreted frizzled-related protein 4
ENSG00000169429	IL8	interleukin 8
ENSG00000163739	CXCL1	chemokine (C-X-C motif) ligand 1 (melanoma growth stimulating activity, alpha)
ENSG00000129988	LBP	lipopolysaccharide binding protein
ENSG00000125378	BMP4	bone morphogenetic protein 4
ENSG00000198759	EGFL6	EGF-like-domain, multiple 6
ENSG00000006074	CCL18	chemokine (C-C motif) ligand 18 (pulmonary and activation-regulated)
plasma membrane----GO:0005886
C=3650;O=103;E=59.98;R=1.72;rawP=1.57e-09;adjP=6.24e-08
ENSG00000160683	CXCR5	chemokine (C-X-C motif) receptor 5
ENSG00000166250	ASAM	adipocyte-specific adhesion molecule
ENSG00000131042	LILRB2	leukocyte immunoglobulin-like receptor, subfamily B (with TM and ITIM domains), member 2
ENSG00000108405	P2RX1	purinergic receptor P2X, ligand-gated ion channel, 1
ENSG00000136040	PLXNC1	plexin C1
ENSG00000182162	P2RY8	purinergic receptor P2Y, G-protein coupled, 8
ENSG00000077943	ITGA8	integrin, alpha 8
ENSG00000184489	PTP4A3	protein tyrosine phosphatase type IVA, member 3
ENSG00000010327	STAB1	stabilin 1
ENSG00000174123	TLR10	toll-like receptor 10
ENSG00000179826	MRGPRX3	MAS-related GPR, member X3
ENSG00000154451	GBP5	guanylate binding protein 5
ENSG00000101445	PPP1R16B	protein phosphatase 1, regulatory (inhibitor) subunit 16B
ENSG00000186472	PCLO	piccolo (presynaptic cytomatrix protein)
ENSG00000101098	RIMS4	regulating synaptic membrane exocytosis 4
ENSG00000170961	HAS2	hyaluronan synthase 2
ENSG00000143119	CD53	CD53 molecule
ENSG00000141968	VAV1	vav 1 guanine nucleotide exchange factor
ENSG00000145113	MUC4	mucin 4, cell surface associated
ENSG00000197943	PLCG2	phospholipase C, gamma 2 (phosphatidylinositol-specific)
ENSG00000133800	LYVE1	lymphatic vessel endothelial hyaluronan receptor 1
ENSG00000102879	CORO1A	coronin, actin binding protein, 1A
ENSG00000171345	KRT19	keratin 19
ENSG00000177575	CD163	CD163 molecule
ENSG00000171914	TLN2	talin 2
ENSG00000165168	CYBB	cytochrome b-245, beta polypeptide
ENSG00000128591	FLNC	filamin C, gamma
ENSG00000185686	PRAME	preferentially expressed antigen in melanoma
ENSG00000005844	ITGAL	integrin, alpha L (antigen CD11A (p180), lymphocyte function-associated antigen 1; alpha polypeptide)
ENSG00000112303	VNN2	vanin 2
ENSG00000100365	NCF4	neutrophil cytosolic factor 4, 40kDa
ENSG00000160856	FCRL3	Fc receptor-like 3
ENSG00000171051	FPR1	formyl peptide receptor 1
ENSG00000153292	GPR110	G protein-coupled receptor 110
ENSG00000118308	LRMP	lymphoid-restricted membrane protein
ENSG00000170866	LILRA3	leukocyte immunoglobulin-like receptor, subfamily A (without TM domain), member 3
ENSG00000170458	CD14	CD14 molecule
ENSG00000162747	FCGR3B	Fc fragment of IgG, low affinity IIIb, receptor (CD16b)
ENSG00000156738	MS4A1	membrane-spanning 4-domains, subfamily A, member 1
ENSG00000057019	DCBLD2	discoidin, CUB and LCCL domain containing 2
ENSG00000042980	ADAM28	ADAM metallopeptidase domain 28
ENSG00000160255	ITGB2	integrin, beta 2 (complement component 3 receptor 3 and 4 subunit)
ENSG00000051523	CYBA	cytochrome b-245, alpha polypeptide
ENSG00000166501	PRKCB	protein kinase C, beta
ENSG00000123338	NCKAP1L	NCK-associated protein 1-like
ENSG00000177455	CD19	CD19 molecule
ENSG00000054356	PTPRN	protein tyrosine phosphatase, receptor type, N
ENSG00000162511	LAPTM5	lysosomal protein transmembrane 5
ENSG00000169962	TAS1R3	taste receptor, type 1, member 3
ENSG00000162739	SLAMF6	SLAM family member 6
ENSG00000134460	IL2RA	interleukin 2 receptor, alpha
ENSG00000167613	LAIR1	leukocyte-associated immunoglobulin-like receptor 1
ENSG00000134873	CLDN10	claudin 10
ENSG00000125810	CD93	CD93 molecule
ENSG00000127507	EMR2	egf-like module containing, mucin-like, hormone receptor-like 2
ENSG00000187689	AMTN	amelotin
ENSG00000155465	SLC7A7	solute carrier family 7 (cationic amino acid transporter, y+ system), member 7
ENSG00000159618	GPR114	G protein-coupled receptor 114
ENSG00000174175	SELP	selectin P (granule membrane protein 140kDa, antigen CD62)
ENSG00000132704	FCRL2	Fc receptor-like 2
ENSG00000165457	FOLR2	folate receptor 2 (fetal)
ENSG00000139193	CD27	CD27 molecule
ENSG00000106688	SLC1A1	solute carrier family 1 (neuronal/epithelial high affinity glutamate transporter, system Xag), member 1
ENSG00000091129	NRCAM	neuronal cell adhesion molecule
ENSG00000090104	RGS1	regulator of G-protein signaling 1
ENSG00000163534	FCRL1	Fc receptor-like 1
ENSG00000134061	CD180	CD180 molecule
ENSG00000100368	CSF2RB	colony stimulating factor 2 receptor, beta, low-affinity (granulocyte-macrophage)
ENSG00000105369	CD79A	CD79a molecule, immunoglobulin-associated alpha
ENSG00000151012	SLC7A11	solute carrier family 7, (cationic amino acid transporter, y+ system) member 11
ENSG00000012124	CD22	CD22 molecule
ENSG00000119699	TGFB3	transforming growth factor, beta 3
ENSG00000143297	FCRL5	Fc receptor-like 5
ENSG00000122188	LAX1	lymphocyte transmembrane adaptor 1
ENSG00000136960	ENPP2	ectonucleotide pyrophosphatase/phosphodiesterase 2
ENSG00000177272	KCNA3	potassium voltage-gated channel, shaker-related subfamily, member 3
ENSG00000185862	EVI2B	ecotropic viral integration site 2B
ENSG00000058335	RASGRF1	Ras protein-specific guanine nucleotide-releasing factor 1
ENSG00000072694	FCGR2B	Fc fragment of IgG, low affinity IIb, receptor (CD32)
ENSG00000125966	MMP24	matrix metallopeptidase 24 (membrane-inserted)
ENSG00000147168	IL2RG	interleukin 2 receptor, gamma (severe combined immunodeficiency)
ENSG00000007312	CD79B	CD79b molecule, immunoglobulin-associated beta
ENSG00000076662	ICAM3	intercellular adhesion molecule 3
ENSG00000004468	CD38	CD38 molecule
ENSG00000108622	ICAM2	intercellular adhesion molecule 2
ENSG00000168421	RHOH	ras homolog gene family, member H
ENSG00000198681	MAGEA1	melanoma antigen family A, 1 (directs expression of antigen MZ2-E)
ENSG00000110324	IL10RA	interleukin 10 receptor, alpha
ENSG00000081237	PTPRC	protein tyrosine phosphatase, receptor type, C
ENSG00000104894	CD37	CD37 molecule
ENSG00000121966	CXCR4	chemokine (C-X-C motif) receptor 4
ENSG00000168685	IL7R	interleukin 7 receptor
ENSG00000152208	GRID2	glutamate receptor, ionotropic, delta 2
ENSG00000203710	CR1	complement component (3b/4b) receptor 1 (Knops blood group)
ENSG00000143226	FCGR2A	Fc fragment of IgG, low affinity IIa, receptor (CD32)
ENSG00000143603	KCNN3	potassium intermediate/small conductance calcium-activated channel, subfamily N, member 3
ENSG00000198794	SCAMP5	secretory carrier membrane protein 5
ENSG00000015413	DPEP1	dipeptidase 1 (renal)
ENSG00000048462	TNFRSF17	tumor necrosis factor receptor superfamily, member 17
ENSG00000134765	DSC1	desmocollin 1
ENSG00000170558	CDH2	cadherin 2, type 1, N-cadherin (neuronal)
ENSG00000198910	L1CAM	L1 cell adhesion molecule
ENSG00000196549	MME	membrane metallo-endopeptidase
extracellular matrix----GO:0031012
C=335;O=21;E=5.50;R=3.81;rawP=1.69e-07;adjP=5.37e-06
ENSG00000100985	MMP9	matrix metallopeptidase 9 (gelatinase B, 92kDa gelatinase, 92kDa type IV collagenase)
ENSG00000187689	AMTN	amelotin
ENSG00000109205	ODAM	odontogenic, ameloblast asssociated
ENSG00000125966	MMP24	matrix metallopeptidase 24 (membrane-inserted)
ENSG00000139329	LUM	lumican
ENSG00000196611	MMP1	matrix metallopeptidase 1 (interstitial collagenase)
ENSG00000138829	FBN2	fibrillin 2
ENSG00000101680	LAMA1	laminin, alpha 1
ENSG00000091128	LAMB4	laminin, beta 4
ENSG00000145681	HAPLN1	hyaluronan and proteoglycan link protein 1
ENSG00000137673	MMP7	matrix metallopeptidase 7 (matrilysin, uterine)
ENSG00000154736	ADAMTS5	ADAM metallopeptidase with thrombospondin type 1 motif, 5
ENSG00000145113	MUC4	mucin 4, cell surface associated
ENSG00000149968	MMP3	matrix metallopeptidase 3 (stromelysin 1, progelatinase)
ENSG00000133110	POSTN	periostin, osteoblast specific factor
ENSG00000038427	VCAN	versican
ENSG00000204291	COL15A1	collagen, type XV, alpha 1
ENSG00000119699	TGFB3	transforming growth factor, beta 3
ENSG00000125378	BMP4	bone morphogenetic protein 4
ENSG00000137745	MMP13	matrix metallopeptidase 13 (collagenase 3)
ENSG00000198759	EGFL6	EGF-like-domain, multiple 6
proteinaceous extracellular matrix----GO:0005578
C=311;O=20;E=5.11;R=3.91;rawP=2.23e-07;adjP=5.91e-06
ENSG00000100985	MMP9	matrix metallopeptidase 9 (gelatinase B, 92kDa gelatinase, 92kDa type IV collagenase)
ENSG00000187689	AMTN	amelotin
ENSG00000109205	ODAM	odontogenic, ameloblast asssociated
ENSG00000125966	MMP24	matrix metallopeptidase 24 (membrane-inserted)
ENSG00000139329	LUM	lumican
ENSG00000196611	MMP1	matrix metallopeptidase 1 (interstitial collagenase)
ENSG00000138829	FBN2	fibrillin 2
ENSG00000101680	LAMA1	laminin, alpha 1
ENSG00000091128	LAMB4	laminin, beta 4
ENSG00000145681	HAPLN1	hyaluronan and proteoglycan link protein 1
ENSG00000137673	MMP7	matrix metallopeptidase 7 (matrilysin, uterine)
ENSG00000154736	ADAMTS5	ADAM metallopeptidase with thrombospondin type 1 motif, 5
ENSG00000145113	MUC4	mucin 4, cell surface associated
ENSG00000149968	MMP3	matrix metallopeptidase 3 (stromelysin 1, progelatinase)
ENSG00000133110	POSTN	periostin, osteoblast specific factor
ENSG00000038427	VCAN	versican
ENSG00000204291	COL15A1	collagen, type XV, alpha 1
ENSG00000125378	BMP4	bone morphogenetic protein 4
ENSG00000137745	MMP13	matrix metallopeptidase 13 (collagenase 3)
ENSG00000198759	EGFL6	EGF-like-domain, multiple 6
integral to plasma membrane----GO:0005887
C=1183;O=42;E=19.44;R=2.16;rawP=1.70e-06;adjP=3.86e-05
ENSG00000160683	CXCR5	chemokine (C-X-C motif) receptor 5
ENSG00000131042	LILRB2	leukocyte immunoglobulin-like receptor, subfamily B (with TM and ITIM domains), member 2
ENSG00000108405	P2RX1	purinergic receptor P2X, ligand-gated ion channel, 1
ENSG00000155465	SLC7A7	solute carrier family 7 (cationic amino acid transporter, y+ system), member 7
ENSG00000174175	SELP	selectin P (granule membrane protein 140kDa, antigen CD62)
ENSG00000077943	ITGA8	integrin, alpha 8
ENSG00000010327	STAB1	stabilin 1
ENSG00000139193	CD27	CD27 molecule
ENSG00000091129	NRCAM	neuronal cell adhesion molecule
ENSG00000106688	SLC1A1	solute carrier family 1 (neuronal/epithelial high affinity glutamate transporter, system Xag), member 1
ENSG00000170961	HAS2	hyaluronan synthase 2
ENSG00000100368	CSF2RB	colony stimulating factor 2 receptor, beta, low-affinity (granulocyte-macrophage)
ENSG00000145113	MUC4	mucin 4, cell surface associated
ENSG00000012124	CD22	CD22 molecule
ENSG00000133800	LYVE1	lymphatic vessel endothelial hyaluronan receptor 1
ENSG00000177575	CD163	CD163 molecule
ENSG00000136960	ENPP2	ectonucleotide pyrophosphatase/phosphodiesterase 2
ENSG00000177272	KCNA3	potassium voltage-gated channel, shaker-related subfamily, member 3
ENSG00000165168	CYBB	cytochrome b-245, beta polypeptide
ENSG00000185862	EVI2B	ecotropic viral integration site 2B
ENSG00000005844	ITGAL	integrin, alpha L (antigen CD11A (p180), lymphocyte function-associated antigen 1; alpha polypeptide)
ENSG00000125966	MMP24	matrix metallopeptidase 24 (membrane-inserted)
ENSG00000100365	NCF4	neutrophil cytosolic factor 4, 40kDa
ENSG00000118308	LRMP	lymphoid-restricted membrane protein
ENSG00000007312	CD79B	CD79b molecule, immunoglobulin-associated beta
ENSG00000147168	IL2RG	interleukin 2 receptor, gamma (severe combined immunodeficiency)
ENSG00000076662	ICAM3	intercellular adhesion molecule 3
ENSG00000108622	ICAM2	intercellular adhesion molecule 2
ENSG00000156738	MS4A1	membrane-spanning 4-domains, subfamily A, member 1
ENSG00000057019	DCBLD2	discoidin, CUB and LCCL domain containing 2
ENSG00000081237	PTPRC	protein tyrosine phosphatase, receptor type, C
ENSG00000160255	ITGB2	integrin, beta 2 (complement component 3 receptor 3 and 4 subunit)
ENSG00000104894	CD37	CD37 molecule
ENSG00000121966	CXCR4	chemokine (C-X-C motif) receptor 4
ENSG00000051523	CYBA	cytochrome b-245, alpha polypeptide
ENSG00000123338	NCKAP1L	NCK-associated protein 1-like
ENSG00000152208	GRID2	glutamate receptor, ionotropic, delta 2
ENSG00000203710	CR1	complement component (3b/4b) receptor 1 (Knops blood group)
ENSG00000177455	CD19	CD19 molecule
ENSG00000054356	PTPRN	protein tyrosine phosphatase, receptor type, N
ENSG00000162511	LAPTM5	lysosomal protein transmembrane 5
ENSG00000196549	MME	membrane metallo-endopeptidase
intrinsic to plasma membrane----GO:0031226
C=1206;O=42;E=19.82;R=2.12;rawP=2.77e-06;adjP=5.51e-05
ENSG00000160683	CXCR5	chemokine (C-X-C motif) receptor 5
ENSG00000131042	LILRB2	leukocyte immunoglobulin-like receptor, subfamily B (with TM and ITIM domains), member 2
ENSG00000108405	P2RX1	purinergic receptor P2X, ligand-gated ion channel, 1
ENSG00000155465	SLC7A7	solute carrier family 7 (cationic amino acid transporter, y+ system), member 7
ENSG00000174175	SELP	selectin P (granule membrane protein 140kDa, antigen CD62)
ENSG00000077943	ITGA8	integrin, alpha 8
ENSG00000010327	STAB1	stabilin 1
ENSG00000139193	CD27	CD27 molecule
ENSG00000091129	NRCAM	neuronal cell adhesion molecule
ENSG00000106688	SLC1A1	solute carrier family 1 (neuronal/epithelial high affinity glutamate transporter, system Xag), member 1
ENSG00000170961	HAS2	hyaluronan synthase 2
ENSG00000100368	CSF2RB	colony stimulating factor 2 receptor, beta, low-affinity (granulocyte-macrophage)
ENSG00000145113	MUC4	mucin 4, cell surface associated
ENSG00000012124	CD22	CD22 molecule
ENSG00000133800	LYVE1	lymphatic vessel endothelial hyaluronan receptor 1
ENSG00000177575	CD163	CD163 molecule
ENSG00000136960	ENPP2	ectonucleotide pyrophosphatase/phosphodiesterase 2
ENSG00000177272	KCNA3	potassium voltage-gated channel, shaker-related subfamily, member 3
ENSG00000165168	CYBB	cytochrome b-245, beta polypeptide
ENSG00000185862	EVI2B	ecotropic viral integration site 2B
ENSG00000005844	ITGAL	integrin, alpha L (antigen CD11A (p180), lymphocyte function-associated antigen 1; alpha polypeptide)
ENSG00000125966	MMP24	matrix metallopeptidase 24 (membrane-inserted)
ENSG00000100365	NCF4	neutrophil cytosolic factor 4, 40kDa
ENSG00000118308	LRMP	lymphoid-restricted membrane protein
ENSG00000007312	CD79B	CD79b molecule, immunoglobulin-associated beta
ENSG00000147168	IL2RG	interleukin 2 receptor, gamma (severe combined immunodeficiency)
ENSG00000076662	ICAM3	intercellular adhesion molecule 3
ENSG00000108622	ICAM2	intercellular adhesion molecule 2
ENSG00000156738	MS4A1	membrane-spanning 4-domains, subfamily A, member 1
ENSG00000057019	DCBLD2	discoidin, CUB and LCCL domain containing 2
ENSG00000081237	PTPRC	protein tyrosine phosphatase, receptor type, C
ENSG00000160255	ITGB2	integrin, beta 2 (complement component 3 receptor 3 and 4 subunit)
ENSG00000104894	CD37	CD37 molecule
ENSG00000121966	CXCR4	chemokine (C-X-C motif) receptor 4
ENSG00000051523	CYBA	cytochrome b-245, alpha polypeptide
ENSG00000123338	NCKAP1L	NCK-associated protein 1-like
ENSG00000152208	GRID2	glutamate receptor, ionotropic, delta 2
ENSG00000203710	CR1	complement component (3b/4b) receptor 1 (Knops blood group)
ENSG00000177455	CD19	CD19 molecule
ENSG00000054356	PTPRN	protein tyrosine phosphatase, receptor type, N
ENSG00000162511	LAPTM5	lysosomal protein transmembrane 5
ENSG00000196549	MME	membrane metallo-endopeptidase
plasma membrane part----GO:0044459
C=1918;O=57;E=31.52;R=1.81;rawP=5.52e-06;adjP=9.75e-05
ENSG00000160683	CXCR5	chemokine (C-X-C motif) receptor 5
ENSG00000187689	AMTN	amelotin
ENSG00000166250	ASAM	adipocyte-specific adhesion molecule
ENSG00000131042	LILRB2	leukocyte immunoglobulin-like receptor, subfamily B (with TM and ITIM domains), member 2
ENSG00000108405	P2RX1	purinergic receptor P2X, ligand-gated ion channel, 1
ENSG00000155465	SLC7A7	solute carrier family 7 (cationic amino acid transporter, y+ system), member 7
ENSG00000174175	SELP	selectin P (granule membrane protein 140kDa, antigen CD62)
ENSG00000077943	ITGA8	integrin, alpha 8
ENSG00000010327	STAB1	stabilin 1
ENSG00000139193	CD27	CD27 molecule
ENSG00000186472	PCLO	piccolo (presynaptic cytomatrix protein)
ENSG00000091129	NRCAM	neuronal cell adhesion molecule
ENSG00000101098	RIMS4	regulating synaptic membrane exocytosis 4
ENSG00000106688	SLC1A1	solute carrier family 1 (neuronal/epithelial high affinity glutamate transporter, system Xag), member 1
ENSG00000170961	HAS2	hyaluronan synthase 2
ENSG00000100368	CSF2RB	colony stimulating factor 2 receptor, beta, low-affinity (granulocyte-macrophage)
ENSG00000105369	CD79A	CD79a molecule, immunoglobulin-associated alpha
ENSG00000145113	MUC4	mucin 4, cell surface associated
ENSG00000012124	CD22	CD22 molecule
ENSG00000119699	TGFB3	transforming growth factor, beta 3
ENSG00000133800	LYVE1	lymphatic vessel endothelial hyaluronan receptor 1
ENSG00000102879	CORO1A	coronin, actin binding protein, 1A
ENSG00000177575	CD163	CD163 molecule
ENSG00000171914	TLN2	talin 2
ENSG00000136960	ENPP2	ectonucleotide pyrophosphatase/phosphodiesterase 2
ENSG00000177272	KCNA3	potassium voltage-gated channel, shaker-related subfamily, member 3
ENSG00000165168	CYBB	cytochrome b-245, beta polypeptide
ENSG00000185862	EVI2B	ecotropic viral integration site 2B
ENSG00000005844	ITGAL	integrin, alpha L (antigen CD11A (p180), lymphocyte function-associated antigen 1; alpha polypeptide)
ENSG00000125966	MMP24	matrix metallopeptidase 24 (membrane-inserted)
ENSG00000100365	NCF4	neutrophil cytosolic factor 4, 40kDa
ENSG00000147168	IL2RG	interleukin 2 receptor, gamma (severe combined immunodeficiency)
ENSG00000007312	CD79B	CD79b molecule, immunoglobulin-associated beta
ENSG00000118308	LRMP	lymphoid-restricted membrane protein
ENSG00000076662	ICAM3	intercellular adhesion molecule 3
ENSG00000108622	ICAM2	intercellular adhesion molecule 2
ENSG00000156738	MS4A1	membrane-spanning 4-domains, subfamily A, member 1
ENSG00000057019	DCBLD2	discoidin, CUB and LCCL domain containing 2
ENSG00000160255	ITGB2	integrin, beta 2 (complement component 3 receptor 3 and 4 subunit)
ENSG00000081237	PTPRC	protein tyrosine phosphatase, receptor type, C
ENSG00000104894	CD37	CD37 molecule
ENSG00000121966	CXCR4	chemokine (C-X-C motif) receptor 4
ENSG00000051523	CYBA	cytochrome b-245, alpha polypeptide
ENSG00000123338	NCKAP1L	NCK-associated protein 1-like
ENSG00000168685	IL7R	interleukin 7 receptor
ENSG00000152208	GRID2	glutamate receptor, ionotropic, delta 2
ENSG00000203710	CR1	complement component (3b/4b) receptor 1 (Knops blood group)
ENSG00000177455	CD19	CD19 molecule
ENSG00000054356	PTPRN	protein tyrosine phosphatase, receptor type, N
ENSG00000162511	LAPTM5	lysosomal protein transmembrane 5
ENSG00000198794	SCAMP5	secretory carrier membrane protein 5
ENSG00000134460	IL2RA	interleukin 2 receptor, alpha
ENSG00000134765	DSC1	desmocollin 1
ENSG00000170558	CDH2	cadherin 2, type 1, N-cadherin (neuronal)
ENSG00000198910	L1CAM	L1 cell adhesion molecule
ENSG00000134873	CLDN10	claudin 10
ENSG00000196549	MME	membrane metallo-endopeptidase
cell surface----GO:0009986
C=305;O=17;E=5.01;R=3.39;rawP=1.24e-05;adjP=0.0002
ENSG00000125810	CD93	CD93 molecule
ENSG00000005844	ITGAL	integrin, alpha L (antigen CD11A (p180), lymphocyte function-associated antigen 1; alpha polypeptide)
ENSG00000174175	SELP	selectin P (granule membrane protein 140kDa, antigen CD62)
ENSG00000147168	IL2RG	interleukin 2 receptor, gamma (severe combined immunodeficiency)
ENSG00000004468	CD38	CD38 molecule
ENSG00000091129	NRCAM	neuronal cell adhesion molecule
ENSG00000143119	CD53	CD53 molecule
ENSG00000057019	DCBLD2	discoidin, CUB and LCCL domain containing 2
ENSG00000081237	PTPRC	protein tyrosine phosphatase, receptor type, C
ENSG00000105369	CD79A	CD79a molecule, immunoglobulin-associated alpha
ENSG00000168685	IL7R	interleukin 7 receptor
ENSG00000177455	CD19	CD19 molecule
ENSG00000012124	CD22	CD22 molecule
ENSG00000119699	TGFB3	transforming growth factor, beta 3
ENSG00000166897	ELFN2	extracellular leucine-rich repeat and fibronectin type III domain containing 2
ENSG00000134460	IL2RA	interleukin 2 receptor, alpha
ENSG00000198910	L1CAM	L1 cell adhesion molecule
external side of plasma membrane----GO:0009897
C=131;O=10;E=2.15;R=4.65;rawP=6.11e-05;adjP=0.0009
ENSG00000081237	PTPRC	protein tyrosine phosphatase, receptor type, C
ENSG00000105369	CD79A	CD79a molecule, immunoglobulin-associated alpha
ENSG00000168685	IL7R	interleukin 7 receptor
ENSG00000174175	SELP	selectin P (granule membrane protein 140kDa, antigen CD62)
ENSG00000012124	CD22	CD22 molecule
ENSG00000177455	CD19	CD19 molecule
ENSG00000147168	IL2RG	interleukin 2 receptor, gamma (severe combined immunodeficiency)
ENSG00000134460	IL2RA	interleukin 2 receptor, alpha
ENSG00000091129	NRCAM	neuronal cell adhesion molecule
ENSG00000198910	L1CAM	L1 cell adhesion molecule
membrane----GO:0016020
C=7186;O=149;E=118.08;R=1.26;rawP=7.93e-05;adjP=0.0011
ENSG00000019186	CYP24A1	cytochrome P450, family 24, subfamily A, polypeptide 1
ENSG00000108405	P2RX1	purinergic receptor P2X, ligand-gated ion channel, 1
ENSG00000136040	PLXNC1	plexin C1
ENSG00000182162	P2RY8	purinergic receptor P2Y, G-protein coupled, 8
ENSG00000077943	ITGA8	integrin, alpha 8
ENSG00000101194	SLC17A9	solute carrier family 17, member 9
ENSG00000184489	PTP4A3	protein tyrosine phosphatase type IVA, member 3
ENSG00000026751	SLAMF7	SLAM family member 7
ENSG00000010327	STAB1	stabilin 1
ENSG00000101445	PPP1R16B	protein phosphatase 1, regulatory (inhibitor) subunit 16B
ENSG00000170961	HAS2	hyaluronan synthase 2
ENSG00000175040	CHST2	carbohydrate (N-acetylglucosamine-6-O) sulfotransferase 2
ENSG00000134285	FKBP11	FK506 binding protein 11, 19 kDa
ENSG00000110900	TSPAN11	tetraspanin 11
ENSG00000145113	MUC4	mucin 4, cell surface associated
ENSG00000171345	KRT19	keratin 19
ENSG00000171914	TLN2	talin 2
ENSG00000121895	TMEM156	transmembrane protein 156
ENSG00000128591	FLNC	filamin C, gamma
ENSG00000005844	ITGAL	integrin, alpha L (antigen CD11A (p180), lymphocyte function-associated antigen 1; alpha polypeptide)
ENSG00000099958	DERL3	Der1-like domain family, member 3
ENSG00000100365	NCF4	neutrophil cytosolic factor 4, 40kDa
ENSG00000187323	DCC	deleted in colorectal carcinoma
ENSG00000153292	GPR110	G protein-coupled receptor 110
ENSG00000010671	BTK	Bruton agammaglobulinemia tyrosine kinase
ENSG00000118308	LRMP	lymphoid-restricted membrane protein
ENSG00000166927	MS4A7	membrane-spanning 4-domains, subfamily A, member 7
ENSG00000101336	HCK	hemopoietic cell kinase
ENSG00000160255	ITGB2	integrin, beta 2 (complement component 3 receptor 3 and 4 subunit)
ENSG00000051523	CYBA	cytochrome b-245, alpha polypeptide
ENSG00000123338	NCKAP1L	NCK-associated protein 1-like
ENSG00000177455	CD19	CD19 molecule
ENSG00000169962	TAS1R3	taste receptor, type 1, member 3
ENSG00000162739	SLAMF6	SLAM family member 6
ENSG00000134460	IL2RA	interleukin 2 receptor, alpha
ENSG00000167613	LAIR1	leukocyte-associated immunoglobulin-like receptor 1
ENSG00000125810	CD93	CD93 molecule
ENSG00000127507	EMR2	egf-like module containing, mucin-like, hormone receptor-like 2
ENSG00000155465	SLC7A7	solute carrier family 7 (cationic amino acid transporter, y+ system), member 7
ENSG00000159618	GPR114	G protein-coupled receptor 114
ENSG00000167861	C17orf28	chromosome 17 open reading frame 28
ENSG00000174175	SELP	selectin P (granule membrane protein 140kDa, antigen CD62)
ENSG00000132704	FCRL2	Fc receptor-like 2
ENSG00000182752	PAPPA	pregnancy-associated plasma protein A, pappalysin 1
ENSG00000074370	ATP2A3	ATPase, Ca++ transporting, ubiquitous
ENSG00000073849	ST6GAL1	ST6 beta-galactosamide alpha-2,6-sialyltranferase 1
ENSG00000139193	CD27	CD27 molecule
ENSG00000106688	SLC1A1	solute carrier family 1 (neuronal/epithelial high affinity glutamate transporter, system Xag), member 1
ENSG00000163534	FCRL1	Fc receptor-like 1
ENSG00000134061	CD180	CD180 molecule
ENSG00000105369	CD79A	CD79a molecule, immunoglobulin-associated alpha
ENSG00000151012	SLC7A11	solute carrier family 7, (cationic amino acid transporter, y+ system) member 11
ENSG00000012124	CD22	CD22 molecule
ENSG00000119699	TGFB3	transforming growth factor, beta 3
ENSG00000143297	FCRL5	Fc receptor-like 5
ENSG00000138131	LOXL4	lysyl oxidase-like 4
ENSG00000183166	CALN1	calneuron 1
ENSG00000197410	DCHS2	dachsous 2 (Drosophila)
ENSG00000177272	KCNA3	potassium voltage-gated channel, shaker-related subfamily, member 3
ENSG00000185862	EVI2B	ecotropic viral integration site 2B
ENSG00000147168	IL2RG	interleukin 2 receptor, gamma (severe combined immunodeficiency)
ENSG00000007312	CD79B	CD79b molecule, immunoglobulin-associated beta
ENSG00000166562	SEC11C	SEC11 homolog C (S. cerevisiae)
ENSG00000076662	ICAM3	intercellular adhesion molecule 3
ENSG00000004468	CD38	CD38 molecule
ENSG00000108622	ICAM2	intercellular adhesion molecule 2
ENSG00000198681	MAGEA1	melanoma antigen family A, 1 (directs expression of antigen MZ2-E)
ENSG00000051108	HERPUD1	homocysteine-inducible, endoplasmic reticulum stress-inducible, ubiquitin-like domain member 1
ENSG00000203710	CR1	complement component (3b/4b) receptor 1 (Knops blood group)
ENSG00000143226	FCGR2A	Fc fragment of IgG, low affinity IIa, receptor (CD32)
ENSG00000143603	KCNN3	potassium intermediate/small conductance calcium-activated channel, subfamily N, member 3
ENSG00000015413	DPEP1	dipeptidase 1 (renal)
ENSG00000134765	DSC1	desmocollin 1
ENSG00000170558	CDH2	cadherin 2, type 1, N-cadherin (neuronal)
ENSG00000198759	EGFL6	EGF-like-domain, multiple 6
ENSG00000196549	MME	membrane metallo-endopeptidase
ENSG00000166250	ASAM	adipocyte-specific adhesion molecule
ENSG00000160683	CXCR5	chemokine (C-X-C motif) receptor 5
ENSG00000100626	GALNTL1	UDP-N-acetyl-alpha-D-galactosamine:polypeptide N-acetylgalactosaminyltransferase-like 1
ENSG00000131042	LILRB2	leukocyte immunoglobulin-like receptor, subfamily B (with TM and ITIM domains), member 2
ENSG00000174123	TLR10	toll-like receptor 10
ENSG00000154451	GBP5	guanylate binding protein 5
ENSG00000179826	MRGPRX3	MAS-related GPR, member X3
ENSG00000101098	RIMS4	regulating synaptic membrane exocytosis 4
ENSG00000137648	TMPRSS4	transmembrane protease, serine 4
ENSG00000134516	DOCK2	dedicator of cytokinesis 2
ENSG00000186472	PCLO	piccolo (presynaptic cytomatrix protein)
ENSG00000143119	CD53	CD53 molecule
ENSG00000141968	VAV1	vav 1 guanine nucleotide exchange factor
ENSG00000197943	PLCG2	phospholipase C, gamma 2 (phosphatidylinositol-specific)
ENSG00000133800	LYVE1	lymphatic vessel endothelial hyaluronan receptor 1
ENSG00000102879	CORO1A	coronin, actin binding protein, 1A
ENSG00000177575	CD163	CD163 molecule
ENSG00000165168	CYBB	cytochrome b-245, beta polypeptide
ENSG00000112303	VNN2	vanin 2
ENSG00000162745	OLFML2B	olfactomedin-like 2B
ENSG00000185686	PRAME	preferentially expressed antigen in melanoma
ENSG00000023445	BIRC3	baculoviral IAP repeat-containing 3
ENSG00000160856	FCRL3	Fc receptor-like 3
ENSG00000138821	SLC39A8	solute carrier family 39 (zinc transporter), member 8
ENSG00000171051	FPR1	formyl peptide receptor 1
ENSG00000170866	LILRA3	leukocyte immunoglobulin-like receptor, subfamily A (without TM domain), member 3
ENSG00000170458	CD14	CD14 molecule
ENSG00000162747	FCGR3B	Fc fragment of IgG, low affinity IIIb, receptor (CD16b)
ENSG00000156738	MS4A1	membrane-spanning 4-domains, subfamily A, member 1
ENSG00000057019	DCBLD2	discoidin, CUB and LCCL domain containing 2
ENSG00000042980	ADAM28	ADAM metallopeptidase domain 28
ENSG00000166501	PRKCB	protein kinase C, beta
ENSG00000182022	CHST15	carbohydrate (N-acetylgalactosamine 4-sulfate 6-O) sulfotransferase 15
ENSG00000054356	PTPRN	protein tyrosine phosphatase, receptor type, N
ENSG00000162511	LAPTM5	lysosomal protein transmembrane 5
ENSG00000134873	CLDN10	claudin 10
ENSG00000106565	TMEM176B	transmembrane protein 176B
ENSG00000187689	AMTN	amelotin
ENSG00000197629	MPEG1	macrophage expressed 1
ENSG00000113532	ST8SIA4	ST8 alpha-N-acetyl-neuraminide alpha-2,8-sialyltransferase 4
ENSG00000165457	FOLR2	folate receptor 2 (fetal)
ENSG00000170381	SEMA3E	sema domain, immunoglobulin domain (Ig), short basic domain, secreted, (semaphorin) 3E
ENSG00000091490	SEL1L3	sel-1 suppressor of lin-12-like 3 (C. elegans)
ENSG00000091129	NRCAM	neuronal cell adhesion molecule
ENSG00000090104	RGS1	regulator of G-protein signaling 1
ENSG00000100368	CSF2RB	colony stimulating factor 2 receptor, beta, low-affinity (granulocyte-macrophage)
ENSG00000163131	CTSS	cathepsin S
ENSG00000122224	LY9	lymphocyte antigen 9
ENSG00000175928	LRRN1	leucine rich repeat neuronal 1
ENSG00000002933	TMEM176A	transmembrane protein 176A
ENSG00000122188	LAX1	lymphocyte transmembrane adaptor 1
ENSG00000135916	ITM2C	integral membrane protein 2C
ENSG00000136960	ENPP2	ectonucleotide pyrophosphatase/phosphodiesterase 2
ENSG00000061656	SPAG4	sperm associated antigen 4
ENSG00000058335	RASGRF1	Ras protein-specific guanine nucleotide-releasing factor 1
ENSG00000072694	FCGR2B	Fc fragment of IgG, low affinity IIb, receptor (CD32)
ENSG00000125966	MMP24	matrix metallopeptidase 24 (membrane-inserted)
ENSG00000205403	CFI	complement factor I
ENSG00000007129	CEACAM21	carcinoembryonic antigen-related cell adhesion molecule 21
ENSG00000153066	TXNDC11	thioredoxin domain containing 11
ENSG00000168421	RHOH	ras homolog gene family, member H
ENSG00000110324	IL10RA	interleukin 10 receptor, alpha
ENSG00000163507	KIAA1524	KIAA1524
ENSG00000081237	PTPRC	protein tyrosine phosphatase, receptor type, C
ENSG00000104894	CD37	CD37 molecule
ENSG00000121966	CXCR4	chemokine (C-X-C motif) receptor 4
ENSG00000180353	HCLS1	hematopoietic cell-specific Lyn substrate 1
ENSG00000168685	IL7R	interleukin 7 receptor
ENSG00000152208	GRID2	glutamate receptor, ionotropic, delta 2
ENSG00000166897	ELFN2	extracellular leucine-rich repeat and fibronectin type III domain containing 2
ENSG00000198794	SCAMP5	secretory carrier membrane protein 5
ENSG00000048462	TNFRSF17	tumor necrosis factor receptor superfamily, member 17
ENSG00000198910	L1CAM	L1 cell adhesion molecule
intrinsic to membrane----GO:0031224
C=5451;O=118;E=89.57;R=1.32;rawP=0.0002;adjP=0.0024
ENSG00000160683	CXCR5	chemokine (C-X-C motif) receptor 5
ENSG00000166250	ASAM	adipocyte-specific adhesion molecule
ENSG00000131042	LILRB2	leukocyte immunoglobulin-like receptor, subfamily B (with TM and ITIM domains), member 2
ENSG00000100626	GALNTL1	UDP-N-acetyl-alpha-D-galactosamine:polypeptide N-acetylgalactosaminyltransferase-like 1
ENSG00000108405	P2RX1	purinergic receptor P2X, ligand-gated ion channel, 1
ENSG00000136040	PLXNC1	plexin C1
ENSG00000182162	P2RY8	purinergic receptor P2Y, G-protein coupled, 8
ENSG00000077943	ITGA8	integrin, alpha 8
ENSG00000101194	SLC17A9	solute carrier family 17, member 9
ENSG00000026751	SLAMF7	SLAM family member 7
ENSG00000010327	STAB1	stabilin 1
ENSG00000174123	TLR10	toll-like receptor 10
ENSG00000179826	MRGPRX3	MAS-related GPR, member X3
ENSG00000101445	PPP1R16B	protein phosphatase 1, regulatory (inhibitor) subunit 16B
ENSG00000137648	TMPRSS4	transmembrane protease, serine 4
ENSG00000170961	HAS2	hyaluronan synthase 2
ENSG00000175040	CHST2	carbohydrate (N-acetylglucosamine-6-O) sulfotransferase 2
ENSG00000143119	CD53	CD53 molecule
ENSG00000134285	FKBP11	FK506 binding protein 11, 19 kDa
ENSG00000110900	TSPAN11	tetraspanin 11
ENSG00000145113	MUC4	mucin 4, cell surface associated
ENSG00000133800	LYVE1	lymphatic vessel endothelial hyaluronan receptor 1
ENSG00000177575	CD163	CD163 molecule
ENSG00000121895	TMEM156	transmembrane protein 156
ENSG00000165168	CYBB	cytochrome b-245, beta polypeptide
ENSG00000005844	ITGAL	integrin, alpha L (antigen CD11A (p180), lymphocyte function-associated antigen 1; alpha polypeptide)
ENSG00000099958	DERL3	Der1-like domain family, member 3
ENSG00000112303	VNN2	vanin 2
ENSG00000100365	NCF4	neutrophil cytosolic factor 4, 40kDa
ENSG00000160856	FCRL3	Fc receptor-like 3
ENSG00000187323	DCC	deleted in colorectal carcinoma
ENSG00000138821	SLC39A8	solute carrier family 39 (zinc transporter), member 8
ENSG00000171051	FPR1	formyl peptide receptor 1
ENSG00000153292	GPR110	G protein-coupled receptor 110
ENSG00000118308	LRMP	lymphoid-restricted membrane protein
ENSG00000170458	CD14	CD14 molecule
ENSG00000166927	MS4A7	membrane-spanning 4-domains, subfamily A, member 7
ENSG00000162747	FCGR3B	Fc fragment of IgG, low affinity IIIb, receptor (CD16b)
ENSG00000101336	HCK	hemopoietic cell kinase
ENSG00000156738	MS4A1	membrane-spanning 4-domains, subfamily A, member 1
ENSG00000057019	DCBLD2	discoidin, CUB and LCCL domain containing 2
ENSG00000042980	ADAM28	ADAM metallopeptidase domain 28
ENSG00000160255	ITGB2	integrin, beta 2 (complement component 3 receptor 3 and 4 subunit)
ENSG00000051523	CYBA	cytochrome b-245, alpha polypeptide
ENSG00000123338	NCKAP1L	NCK-associated protein 1-like
ENSG00000182022	CHST15	carbohydrate (N-acetylgalactosamine 4-sulfate 6-O) sulfotransferase 15
ENSG00000177455	CD19	CD19 molecule
ENSG00000054356	PTPRN	protein tyrosine phosphatase, receptor type, N
ENSG00000162511	LAPTM5	lysosomal protein transmembrane 5
ENSG00000169962	TAS1R3	taste receptor, type 1, member 3
ENSG00000162739	SLAMF6	SLAM family member 6
ENSG00000134460	IL2RA	interleukin 2 receptor, alpha
ENSG00000167613	LAIR1	leukocyte-associated immunoglobulin-like receptor 1
ENSG00000134873	CLDN10	claudin 10
ENSG00000106565	TMEM176B	transmembrane protein 176B
ENSG00000125810	CD93	CD93 molecule
ENSG00000127507	EMR2	egf-like module containing, mucin-like, hormone receptor-like 2
ENSG00000155465	SLC7A7	solute carrier family 7 (cationic amino acid transporter, y+ system), member 7
ENSG00000159618	GPR114	G protein-coupled receptor 114
ENSG00000197629	MPEG1	macrophage expressed 1
ENSG00000167861	C17orf28	chromosome 17 open reading frame 28
ENSG00000174175	SELP	selectin P (granule membrane protein 140kDa, antigen CD62)
ENSG00000132704	FCRL2	Fc receptor-like 2
ENSG00000074370	ATP2A3	ATPase, Ca++ transporting, ubiquitous
ENSG00000073849	ST6GAL1	ST6 beta-galactosamide alpha-2,6-sialyltranferase 1
ENSG00000113532	ST8SIA4	ST8 alpha-N-acetyl-neuraminide alpha-2,8-sialyltransferase 4
ENSG00000165457	FOLR2	folate receptor 2 (fetal)
ENSG00000139193	CD27	CD27 molecule
ENSG00000091490	SEL1L3	sel-1 suppressor of lin-12-like 3 (C. elegans)
ENSG00000106688	SLC1A1	solute carrier family 1 (neuronal/epithelial high affinity glutamate transporter, system Xag), member 1
ENSG00000091129	NRCAM	neuronal cell adhesion molecule
ENSG00000163534	FCRL1	Fc receptor-like 1
ENSG00000134061	CD180	CD180 molecule
ENSG00000100368	CSF2RB	colony stimulating factor 2 receptor, beta, low-affinity (granulocyte-macrophage)
ENSG00000105369	CD79A	CD79a molecule, immunoglobulin-associated alpha
ENSG00000122224	LY9	lymphocyte antigen 9
ENSG00000151012	SLC7A11	solute carrier family 7, (cationic amino acid transporter, y+ system) member 11
ENSG00000175928	LRRN1	leucine rich repeat neuronal 1
ENSG00000012124	CD22	CD22 molecule
ENSG00000143297	FCRL5	Fc receptor-like 5
ENSG00000002933	TMEM176A	transmembrane protein 176A
ENSG00000122188	LAX1	lymphocyte transmembrane adaptor 1
ENSG00000183166	CALN1	calneuron 1
ENSG00000135916	ITM2C	integral membrane protein 2C
ENSG00000136960	ENPP2	ectonucleotide pyrophosphatase/phosphodiesterase 2
ENSG00000197410	DCHS2	dachsous 2 (Drosophila)
ENSG00000177272	KCNA3	potassium voltage-gated channel, shaker-related subfamily, member 3
ENSG00000061656	SPAG4	sperm associated antigen 4
ENSG00000185862	EVI2B	ecotropic viral integration site 2B
ENSG00000072694	FCGR2B	Fc fragment of IgG, low affinity IIb, receptor (CD32)
ENSG00000125966	MMP24	matrix metallopeptidase 24 (membrane-inserted)
ENSG00000147168	IL2RG	interleukin 2 receptor, gamma (severe combined immunodeficiency)
ENSG00000007312	CD79B	CD79b molecule, immunoglobulin-associated beta
ENSG00000166562	SEC11C	SEC11 homolog C (S. cerevisiae)
ENSG00000076662	ICAM3	intercellular adhesion molecule 3
ENSG00000007129	CEACAM21	carcinoembryonic antigen-related cell adhesion molecule 21
ENSG00000004468	CD38	CD38 molecule
ENSG00000108622	ICAM2	intercellular adhesion molecule 2
ENSG00000153066	TXNDC11	thioredoxin domain containing 11
ENSG00000110324	IL10RA	interleukin 10 receptor, alpha
ENSG00000051108	HERPUD1	homocysteine-inducible, endoplasmic reticulum stress-inducible, ubiquitin-like domain member 1
ENSG00000163507	KIAA1524	KIAA1524
ENSG00000081237	PTPRC	protein tyrosine phosphatase, receptor type, C
ENSG00000104894	CD37	CD37 molecule
ENSG00000121966	CXCR4	chemokine (C-X-C motif) receptor 4
ENSG00000168685	IL7R	interleukin 7 receptor
ENSG00000152208	GRID2	glutamate receptor, ionotropic, delta 2
ENSG00000203710	CR1	complement component (3b/4b) receptor 1 (Knops blood group)
ENSG00000143226	FCGR2A	Fc fragment of IgG, low affinity IIa, receptor (CD32)
ENSG00000166897	ELFN2	extracellular leucine-rich repeat and fibronectin type III domain containing 2
ENSG00000143603	KCNN3	potassium intermediate/small conductance calcium-activated channel, subfamily N, member 3
ENSG00000198794	SCAMP5	secretory carrier membrane protein 5
ENSG00000015413	DPEP1	dipeptidase 1 (renal)
ENSG00000048462	TNFRSF17	tumor necrosis factor receptor superfamily, member 17
ENSG00000134765	DSC1	desmocollin 1
ENSG00000170558	CDH2	cadherin 2, type 1, N-cadherin (neuronal)
ENSG00000198910	L1CAM	L1 cell adhesion molecule
ENSG00000196549	MME	membrane metallo-endopeptidase
NADPH oxidase complex----GO:0043020
C=9;O=3;E=0.15;R=20.29;rawP=0.0003;adjP=0.0034
ENSG00000100365	NCF4	neutrophil cytosolic factor 4, 40kDa
ENSG00000051523	CYBA	cytochrome b-245, alpha polypeptide
ENSG00000165168	CYBB	cytochrome b-245, beta polypeptide
integral to membrane----GO:0016021
C=5261;O=112;E=86.45;R=1.30;rawP=0.0006;adjP=0.0064
ENSG00000160683	CXCR5	chemokine (C-X-C motif) receptor 5
ENSG00000166250	ASAM	adipocyte-specific adhesion molecule
ENSG00000131042	LILRB2	leukocyte immunoglobulin-like receptor, subfamily B (with TM and ITIM domains), member 2
ENSG00000100626	GALNTL1	UDP-N-acetyl-alpha-D-galactosamine:polypeptide N-acetylgalactosaminyltransferase-like 1
ENSG00000108405	P2RX1	purinergic receptor P2X, ligand-gated ion channel, 1
ENSG00000136040	PLXNC1	plexin C1
ENSG00000182162	P2RY8	purinergic receptor P2Y, G-protein coupled, 8
ENSG00000077943	ITGA8	integrin, alpha 8
ENSG00000101194	SLC17A9	solute carrier family 17, member 9
ENSG00000026751	SLAMF7	SLAM family member 7
ENSG00000010327	STAB1	stabilin 1
ENSG00000174123	TLR10	toll-like receptor 10
ENSG00000179826	MRGPRX3	MAS-related GPR, member X3
ENSG00000137648	TMPRSS4	transmembrane protease, serine 4
ENSG00000170961	HAS2	hyaluronan synthase 2
ENSG00000175040	CHST2	carbohydrate (N-acetylglucosamine-6-O) sulfotransferase 2
ENSG00000143119	CD53	CD53 molecule
ENSG00000134285	FKBP11	FK506 binding protein 11, 19 kDa
ENSG00000110900	TSPAN11	tetraspanin 11
ENSG00000145113	MUC4	mucin 4, cell surface associated
ENSG00000133800	LYVE1	lymphatic vessel endothelial hyaluronan receptor 1
ENSG00000177575	CD163	CD163 molecule
ENSG00000121895	TMEM156	transmembrane protein 156
ENSG00000165168	CYBB	cytochrome b-245, beta polypeptide
ENSG00000005844	ITGAL	integrin, alpha L (antigen CD11A (p180), lymphocyte function-associated antigen 1; alpha polypeptide)
ENSG00000099958	DERL3	Der1-like domain family, member 3
ENSG00000100365	NCF4	neutrophil cytosolic factor 4, 40kDa
ENSG00000160856	FCRL3	Fc receptor-like 3
ENSG00000187323	DCC	deleted in colorectal carcinoma
ENSG00000138821	SLC39A8	solute carrier family 39 (zinc transporter), member 8
ENSG00000171051	FPR1	formyl peptide receptor 1
ENSG00000153292	GPR110	G protein-coupled receptor 110
ENSG00000118308	LRMP	lymphoid-restricted membrane protein
ENSG00000170458	CD14	CD14 molecule
ENSG00000166927	MS4A7	membrane-spanning 4-domains, subfamily A, member 7
ENSG00000156738	MS4A1	membrane-spanning 4-domains, subfamily A, member 1
ENSG00000057019	DCBLD2	discoidin, CUB and LCCL domain containing 2
ENSG00000042980	ADAM28	ADAM metallopeptidase domain 28
ENSG00000160255	ITGB2	integrin, beta 2 (complement component 3 receptor 3 and 4 subunit)
ENSG00000051523	CYBA	cytochrome b-245, alpha polypeptide
ENSG00000123338	NCKAP1L	NCK-associated protein 1-like
ENSG00000182022	CHST15	carbohydrate (N-acetylgalactosamine 4-sulfate 6-O) sulfotransferase 15
ENSG00000177455	CD19	CD19 molecule
ENSG00000054356	PTPRN	protein tyrosine phosphatase, receptor type, N
ENSG00000162511	LAPTM5	lysosomal protein transmembrane 5
ENSG00000169962	TAS1R3	taste receptor, type 1, member 3
ENSG00000162739	SLAMF6	SLAM family member 6
ENSG00000134460	IL2RA	interleukin 2 receptor, alpha
ENSG00000167613	LAIR1	leukocyte-associated immunoglobulin-like receptor 1
ENSG00000134873	CLDN10	claudin 10
ENSG00000106565	TMEM176B	transmembrane protein 176B
ENSG00000125810	CD93	CD93 molecule
ENSG00000127507	EMR2	egf-like module containing, mucin-like, hormone receptor-like 2
ENSG00000155465	SLC7A7	solute carrier family 7 (cationic amino acid transporter, y+ system), member 7
ENSG00000159618	GPR114	G protein-coupled receptor 114
ENSG00000197629	MPEG1	macrophage expressed 1
ENSG00000167861	C17orf28	chromosome 17 open reading frame 28
ENSG00000174175	SELP	selectin P (granule membrane protein 140kDa, antigen CD62)
ENSG00000132704	FCRL2	Fc receptor-like 2
ENSG00000074370	ATP2A3	ATPase, Ca++ transporting, ubiquitous
ENSG00000073849	ST6GAL1	ST6 beta-galactosamide alpha-2,6-sialyltranferase 1
ENSG00000113532	ST8SIA4	ST8 alpha-N-acetyl-neuraminide alpha-2,8-sialyltransferase 4
ENSG00000139193	CD27	CD27 molecule
ENSG00000091490	SEL1L3	sel-1 suppressor of lin-12-like 3 (C. elegans)
ENSG00000106688	SLC1A1	solute carrier family 1 (neuronal/epithelial high affinity glutamate transporter, system Xag), member 1
ENSG00000091129	NRCAM	neuronal cell adhesion molecule
ENSG00000163534	FCRL1	Fc receptor-like 1
ENSG00000134061	CD180	CD180 molecule
ENSG00000100368	CSF2RB	colony stimulating factor 2 receptor, beta, low-affinity (granulocyte-macrophage)
ENSG00000105369	CD79A	CD79a molecule, immunoglobulin-associated alpha
ENSG00000122224	LY9	lymphocyte antigen 9
ENSG00000151012	SLC7A11	solute carrier family 7, (cationic amino acid transporter, y+ system) member 11
ENSG00000175928	LRRN1	leucine rich repeat neuronal 1
ENSG00000012124	CD22	CD22 molecule
ENSG00000143297	FCRL5	Fc receptor-like 5
ENSG00000002933	TMEM176A	transmembrane protein 176A
ENSG00000122188	LAX1	lymphocyte transmembrane adaptor 1
ENSG00000183166	CALN1	calneuron 1
ENSG00000135916	ITM2C	integral membrane protein 2C
ENSG00000136960	ENPP2	ectonucleotide pyrophosphatase/phosphodiesterase 2
ENSG00000197410	DCHS2	dachsous 2 (Drosophila)
ENSG00000177272	KCNA3	potassium voltage-gated channel, shaker-related subfamily, member 3
ENSG00000061656	SPAG4	sperm associated antigen 4
ENSG00000185862	EVI2B	ecotropic viral integration site 2B
ENSG00000072694	FCGR2B	Fc fragment of IgG, low affinity IIb, receptor (CD32)
ENSG00000125966	MMP24	matrix metallopeptidase 24 (membrane-inserted)
ENSG00000147168	IL2RG	interleukin 2 receptor, gamma (severe combined immunodeficiency)
ENSG00000007312	CD79B	CD79b molecule, immunoglobulin-associated beta
ENSG00000166562	SEC11C	SEC11 homolog C (S. cerevisiae)
ENSG00000076662	ICAM3	intercellular adhesion molecule 3
ENSG00000007129	CEACAM21	carcinoembryonic antigen-related cell adhesion molecule 21
ENSG00000004468	CD38	CD38 molecule
ENSG00000108622	ICAM2	intercellular adhesion molecule 2
ENSG00000153066	TXNDC11	thioredoxin domain containing 11
ENSG00000110324	IL10RA	interleukin 10 receptor, alpha
ENSG00000051108	HERPUD1	homocysteine-inducible, endoplasmic reticulum stress-inducible, ubiquitin-like domain member 1
ENSG00000163507	KIAA1524	KIAA1524
ENSG00000081237	PTPRC	protein tyrosine phosphatase, receptor type, C
ENSG00000104894	CD37	CD37 molecule
ENSG00000121966	CXCR4	chemokine (C-X-C motif) receptor 4
ENSG00000168685	IL7R	interleukin 7 receptor
ENSG00000152208	GRID2	glutamate receptor, ionotropic, delta 2
ENSG00000203710	CR1	complement component (3b/4b) receptor 1 (Knops blood group)
ENSG00000143226	FCGR2A	Fc fragment of IgG, low affinity IIa, receptor (CD32)
ENSG00000143603	KCNN3	potassium intermediate/small conductance calcium-activated channel, subfamily N, member 3
ENSG00000166897	ELFN2	extracellular leucine-rich repeat and fibronectin type III domain containing 2
ENSG00000198794	SCAMP5	secretory carrier membrane protein 5
ENSG00000048462	TNFRSF17	tumor necrosis factor receptor superfamily, member 17
ENSG00000134765	DSC1	desmocollin 1
ENSG00000170558	CDH2	cadherin 2, type 1, N-cadherin (neuronal)
ENSG00000198910	L1CAM	L1 cell adhesion molecule
ENSG00000196549	MME	membrane metallo-endopeptidase
membrane part----GO:0044425
C=6381;O=130;E=104.85;R=1.24;rawP=0.0010;adjP=0.0099
ENSG00000108405	P2RX1	purinergic receptor P2X, ligand-gated ion channel, 1
ENSG00000136040	PLXNC1	plexin C1
ENSG00000182162	P2RY8	purinergic receptor P2Y, G-protein coupled, 8
ENSG00000077943	ITGA8	integrin, alpha 8
ENSG00000101194	SLC17A9	solute carrier family 17, member 9
ENSG00000026751	SLAMF7	SLAM family member 7
ENSG00000010327	STAB1	stabilin 1
ENSG00000101445	PPP1R16B	protein phosphatase 1, regulatory (inhibitor) subunit 16B
ENSG00000170961	HAS2	hyaluronan synthase 2
ENSG00000175040	CHST2	carbohydrate (N-acetylglucosamine-6-O) sulfotransferase 2
ENSG00000134285	FKBP11	FK506 binding protein 11, 19 kDa
ENSG00000110900	TSPAN11	tetraspanin 11
ENSG00000145113	MUC4	mucin 4, cell surface associated
ENSG00000171914	TLN2	talin 2
ENSG00000121895	TMEM156	transmembrane protein 156
ENSG00000128591	FLNC	filamin C, gamma
ENSG00000005844	ITGAL	integrin, alpha L (antigen CD11A (p180), lymphocyte function-associated antigen 1; alpha polypeptide)
ENSG00000099958	DERL3	Der1-like domain family, member 3
ENSG00000100365	NCF4	neutrophil cytosolic factor 4, 40kDa
ENSG00000187323	DCC	deleted in colorectal carcinoma
ENSG00000153292	GPR110	G protein-coupled receptor 110
ENSG00000010671	BTK	Bruton agammaglobulinemia tyrosine kinase
ENSG00000118308	LRMP	lymphoid-restricted membrane protein
ENSG00000166927	MS4A7	membrane-spanning 4-domains, subfamily A, member 7
ENSG00000101336	HCK	hemopoietic cell kinase
ENSG00000160255	ITGB2	integrin, beta 2 (complement component 3 receptor 3 and 4 subunit)
ENSG00000051523	CYBA	cytochrome b-245, alpha polypeptide
ENSG00000123338	NCKAP1L	NCK-associated protein 1-like
ENSG00000177455	CD19	CD19 molecule
ENSG00000169962	TAS1R3	taste receptor, type 1, member 3
ENSG00000162739	SLAMF6	SLAM family member 6
ENSG00000134460	IL2RA	interleukin 2 receptor, alpha
ENSG00000167613	LAIR1	leukocyte-associated immunoglobulin-like receptor 1
ENSG00000125810	CD93	CD93 molecule
ENSG00000127507	EMR2	egf-like module containing, mucin-like, hormone receptor-like 2
ENSG00000155465	SLC7A7	solute carrier family 7 (cationic amino acid transporter, y+ system), member 7
ENSG00000159618	GPR114	G protein-coupled receptor 114
ENSG00000167861	C17orf28	chromosome 17 open reading frame 28
ENSG00000174175	SELP	selectin P (granule membrane protein 140kDa, antigen CD62)
ENSG00000132704	FCRL2	Fc receptor-like 2
ENSG00000074370	ATP2A3	ATPase, Ca++ transporting, ubiquitous
ENSG00000073849	ST6GAL1	ST6 beta-galactosamide alpha-2,6-sialyltranferase 1
ENSG00000139193	CD27	CD27 molecule
ENSG00000106688	SLC1A1	solute carrier family 1 (neuronal/epithelial high affinity glutamate transporter, system Xag), member 1
ENSG00000163534	FCRL1	Fc receptor-like 1
ENSG00000134061	CD180	CD180 molecule
ENSG00000105369	CD79A	CD79a molecule, immunoglobulin-associated alpha
ENSG00000151012	SLC7A11	solute carrier family 7, (cationic amino acid transporter, y+ system) member 11
ENSG00000012124	CD22	CD22 molecule
ENSG00000119699	TGFB3	transforming growth factor, beta 3
ENSG00000143297	FCRL5	Fc receptor-like 5
ENSG00000183166	CALN1	calneuron 1
ENSG00000197410	DCHS2	dachsous 2 (Drosophila)
ENSG00000177272	KCNA3	potassium voltage-gated channel, shaker-related subfamily, member 3
ENSG00000185862	EVI2B	ecotropic viral integration site 2B
ENSG00000147168	IL2RG	interleukin 2 receptor, gamma (severe combined immunodeficiency)
ENSG00000007312	CD79B	CD79b molecule, immunoglobulin-associated beta
ENSG00000166562	SEC11C	SEC11 homolog C (S. cerevisiae)
ENSG00000076662	ICAM3	intercellular adhesion molecule 3
ENSG00000004468	CD38	CD38 molecule
ENSG00000108622	ICAM2	intercellular adhesion molecule 2
ENSG00000051108	HERPUD1	homocysteine-inducible, endoplasmic reticulum stress-inducible, ubiquitin-like domain member 1
ENSG00000203710	CR1	complement component (3b/4b) receptor 1 (Knops blood group)
ENSG00000143226	FCGR2A	Fc fragment of IgG, low affinity IIa, receptor (CD32)
ENSG00000143603	KCNN3	potassium intermediate/small conductance calcium-activated channel, subfamily N, member 3
ENSG00000015413	DPEP1	dipeptidase 1 (renal)
ENSG00000134765	DSC1	desmocollin 1
ENSG00000170558	CDH2	cadherin 2, type 1, N-cadherin (neuronal)
ENSG00000196549	MME	membrane metallo-endopeptidase
ENSG00000166250	ASAM	adipocyte-specific adhesion molecule
ENSG00000160683	CXCR5	chemokine (C-X-C motif) receptor 5
ENSG00000100626	GALNTL1	UDP-N-acetyl-alpha-D-galactosamine:polypeptide N-acetylgalactosaminyltransferase-like 1
ENSG00000131042	LILRB2	leukocyte immunoglobulin-like receptor, subfamily B (with TM and ITIM domains), member 2
ENSG00000174123	TLR10	toll-like receptor 10
ENSG00000179826	MRGPRX3	MAS-related GPR, member X3
ENSG00000101098	RIMS4	regulating synaptic membrane exocytosis 4
ENSG00000137648	TMPRSS4	transmembrane protease, serine 4
ENSG00000134516	DOCK2	dedicator of cytokinesis 2
ENSG00000186472	PCLO	piccolo (presynaptic cytomatrix protein)
ENSG00000143119	CD53	CD53 molecule
ENSG00000133800	LYVE1	lymphatic vessel endothelial hyaluronan receptor 1
ENSG00000102879	CORO1A	coronin, actin binding protein, 1A
ENSG00000177575	CD163	CD163 molecule
ENSG00000165168	CYBB	cytochrome b-245, beta polypeptide
ENSG00000112303	VNN2	vanin 2
ENSG00000023445	BIRC3	baculoviral IAP repeat-containing 3
ENSG00000160856	FCRL3	Fc receptor-like 3
ENSG00000138821	SLC39A8	solute carrier family 39 (zinc transporter), member 8
ENSG00000171051	FPR1	formyl peptide receptor 1
ENSG00000170458	CD14	CD14 molecule
ENSG00000162747	FCGR3B	Fc fragment of IgG, low affinity IIIb, receptor (CD16b)
ENSG00000156738	MS4A1	membrane-spanning 4-domains, subfamily A, member 1
ENSG00000057019	DCBLD2	discoidin, CUB and LCCL domain containing 2
ENSG00000042980	ADAM28	ADAM metallopeptidase domain 28
ENSG00000166501	PRKCB	protein kinase C, beta
ENSG00000182022	CHST15	carbohydrate (N-acetylgalactosamine 4-sulfate 6-O) sulfotransferase 15
ENSG00000162511	LAPTM5	lysosomal protein transmembrane 5
ENSG00000054356	PTPRN	protein tyrosine phosphatase, receptor type, N
ENSG00000106565	TMEM176B	transmembrane protein 176B
ENSG00000134873	CLDN10	claudin 10
ENSG00000187689	AMTN	amelotin
ENSG00000197629	MPEG1	macrophage expressed 1
ENSG00000165457	FOLR2	folate receptor 2 (fetal)
ENSG00000113532	ST8SIA4	ST8 alpha-N-acetyl-neuraminide alpha-2,8-sialyltransferase 4
ENSG00000091490	SEL1L3	sel-1 suppressor of lin-12-like 3 (C. elegans)
ENSG00000091129	NRCAM	neuronal cell adhesion molecule
ENSG00000100368	CSF2RB	colony stimulating factor 2 receptor, beta, low-affinity (granulocyte-macrophage)
ENSG00000122224	LY9	lymphocyte antigen 9
ENSG00000175928	LRRN1	leucine rich repeat neuronal 1
ENSG00000002933	TMEM176A	transmembrane protein 176A
ENSG00000122188	LAX1	lymphocyte transmembrane adaptor 1
ENSG00000136960	ENPP2	ectonucleotide pyrophosphatase/phosphodiesterase 2
ENSG00000135916	ITM2C	integral membrane protein 2C
ENSG00000061656	SPAG4	sperm associated antigen 4
ENSG00000072694	FCGR2B	Fc fragment of IgG, low affinity IIb, receptor (CD32)
ENSG00000125966	MMP24	matrix metallopeptidase 24 (membrane-inserted)
ENSG00000007129	CEACAM21	carcinoembryonic antigen-related cell adhesion molecule 21
ENSG00000153066	TXNDC11	thioredoxin domain containing 11
ENSG00000163507	KIAA1524	KIAA1524
ENSG00000110324	IL10RA	interleukin 10 receptor, alpha
ENSG00000081237	PTPRC	protein tyrosine phosphatase, receptor type, C
ENSG00000104894	CD37	CD37 molecule
ENSG00000121966	CXCR4	chemokine (C-X-C motif) receptor 4
ENSG00000180353	HCLS1	hematopoietic cell-specific Lyn substrate 1
ENSG00000168685	IL7R	interleukin 7 receptor
ENSG00000152208	GRID2	glutamate receptor, ionotropic, delta 2
ENSG00000166897	ELFN2	extracellular leucine-rich repeat and fibronectin type III domain containing 2
ENSG00000198794	SCAMP5	secretory carrier membrane protein 5
ENSG00000048462	TNFRSF17	tumor necrosis factor receptor superfamily, member 17
ENSG00000198910	L1CAM	L1 cell adhesion molecule
extracellular matrix part----GO:0044420
C=109;O=7;E=1.79;R=3.91;rawP=0.0021;adjP=0.0196
ENSG00000187689	AMTN	amelotin
ENSG00000109205	ODAM	odontogenic, ameloblast asssociated
ENSG00000101680	LAMA1	laminin, alpha 1
ENSG00000198759	EGFL6	EGF-like-domain, multiple 6
ENSG00000139329	LUM	lumican
ENSG00000204291	COL15A1	collagen, type XV, alpha 1
ENSG00000091128	LAMB4	laminin, beta 4
